# Supplementary material for: Activation of Dormant Secondary Metabolite Production by Introducing Neomycin Resistance into the Deep-Sea Fungus, Aspergillus versicolor ZBY-3
Source: PubMed Central journal article supplement (PMC4145319; doi:10.3390/md12084326), 2014-07-29

## Supplementary Information

|                                                                                                                                  |     |
|----------------------------------------------------------------------------------------------------------------------------------|-----|
| <b>S1.</b> Physicochemical and spectroscopic data of five known compounds <b>1</b> , <b>2</b> and <b>4–6</b>                     | S2  |
| <b>Figure S1.</b> HPLC-PDAD-UV analysis of the EtOAc extracts of the control ZBY-3 strain and selected mutants                   | S4  |
| <b>Figure S2.</b> HPLC-ESI-MS analysis of the EtOAc extracts of the control ZBY-3 strain and selected mutants                    | S12 |
| <b>Figure S3.</b> HPLC-PDAD-UV analysis of <b>1–6</b> and the EtOAc extracts of the mutant u2n2h3-3 and the control ZBY-3 strain | S48 |
| <b>Figure S4.</b> HPLC-ESI-MS analysis of <b>1–6</b> and the EtOAc extracts of the mutant u2n2h3-3 and the control ZBY-3 strain  | S50 |
| <b>Figure S5.</b> Positive ESI-MS and HR-ESI-MS spectra of <b>3</b>                                                              | S56 |
| <b>Figure S6.</b> <sup>1</sup> H NMR spectrum of <b>3</b> in CD <sub>3</sub> OD                                                  | S57 |
| <b>Figure S7.</b> <sup>13</sup> C NMR spectrum of <b>3</b> in CD <sub>3</sub> OD                                                 | S58 |
| <b>Figure S8.</b> <sup>1</sup> H- <sup>1</sup> H COSY spectrum of <b>3</b> in CD <sub>3</sub> OD                                 | S59 |
| <b>Figure S9.</b> HMQC spectrum of <b>3</b> in CD <sub>3</sub> OD                                                                | S60 |
| <b>Figure S10.</b> HMBC spectrum of <b>3</b> in CD <sub>3</sub> OD                                                               | S61 |

**S1. Physicochemical and Spectroscopic Data of Five Known Compounds 1, 2 and 4–6**

Cyclo(D-Pro-D-Phe) (**1**): Crystalline powder (MeOH), m.p. 150–151 °C,  $[\alpha]_D^{25} +10.9$  (*c* 0.14, MeOH). Positive ion ESIMS *m/z*: 245  $[M + H]^+$ , 267  $[M + Na]^+$ , 283  $[M + K]^+$ ; negative ion ESIMS *m/z*: 243  $[M - H]^-$ . Positive HRESIMS *m/z*: measured 245.1283  $[M + H]^+$ , calcd for  $C_{14}H_{17}N_2O_2$   $[M + H]^+$  245.1290; measured 267.1101  $[M + Na]^+$ , calcd for  $C_{14}H_{16}N_2O_2Na$   $[M + Na]^+$  267.1109.  $^1H$  NMR (400 MHz,  $CDCl_3$ )  $\delta$ : 7.39–7.20 (5H, m, H-2'–H-6'), 5.63 (1H, br s, 8-NH), 4.28 (1H, dd, *J* = 10.7, 2.8 Hz, H-9), 4.08 (1H, br t, *J* = 7.5 Hz, H-6), 3.71–3.53 (3H, m, H<sub>2</sub>-3, Ha-10), 2.77 (1H, dd, *J* = 14.5, 10.8 Hz, Hb-10), 2.38–2.30 (1H, m, Hb-5), 2.07–1.84 (3H, m, H<sub>2</sub>-4, Ha-5).  $^{13}C$  NMR (100 MHz,  $CDCl_3$ )  $\delta$ : 169.6 (C-1), 165.2 (C-7), 136.0 (C-1'), 129.5 (2C, C-2',6'), 129.2 (2C, C-3'5'), 127.7 (C-4'), 59.3 (C-6), 56.3 (C-9), 45.6 (C-3), 36.9 (C-10), 28.5 (C-5), 22.7 (C-4).

Cyclo-(D-Pro-D-Tyr) (**2**): Crystalline solid (MeOH), m.p. 147–149 °C,  $[\alpha]_D^{25} +11.9$  (*c* 0.32, MeOH). Positive ion ESIMS *m/z*: 261  $[M + H]^+$ , 283  $[M + Na]^+$ , 299  $[M + K]^+$ ; negative ion ESIMS *m/z*: 259  $[M - H]^-$ . Positive HRESIMS *m/z*: measured 261.1231  $[M + H]^+$ , calcd for  $C_{14}H_{17}N_2O_3$   $[M + H]^+$  261.1239; measured 283.1049  $[M + Na]^+$ , calcd for  $C_{14}H_{16}N_2O_3Na$   $[M + Na]^+$  283.1059; measured 543.2210  $[2M + Na]^+$ , calcd for  $C_{28}H_{32}N_4O_6Na$   $[2M + Na]^+$  543.2220.  $^1H$  NMR (400 MHz,  $CDCl_3$ )  $\delta$ : 7.08 (2H, d, *J* = 8.3 Hz, H-2',6'), 6.80 (2H, d, *J* = 8.3 Hz, H-3',5'), 5.63 (1H, br s, 8-NH), 4.21 (1H, br d, *J* = 8.8 Hz, H-9), 4.09 (1H, t, *J* = 7.50 Hz, H-6), 3.69–3.49 (3H, m, H<sub>2</sub>-3, Hb-10), 2.73 (1H, dd, *J* = 14.5, 10.6 Hz, Ha-10), 2.43–2.22 (1H, m, Hb-5), 1.99–1.86 (3H, m, H<sub>2</sub>-4, Hb-5).  $^{13}C$  NMR (100 MHz,  $CDCl_3$ )  $\delta$ : 169.6 (C-1), 165.2 (C-7), 155.4 (C-4'), 130.5 (2C, C-2',6'), 127.7 (C-1'), 116.3 (2C, C-3',5'), 59.6 (C-6), 56.3 (C-9), 45.6 (C-3), 36.0 (C-10), 28.5 (C-5), 22.8 (C-4).

Cyclo(L-Ile-L-Pro) (**4**): Crystalline powder (MeOH), m.p. 107–110 °C.  $[\alpha]_D^{25} +59.1$  (*c* 0.46, MeOH). Positive ion ESIMS *m/z*: 211  $[M + H]^+$ , 233  $[M + Na]^+$ ; negative ion ESIMS *m/z*: 209  $[M - H]^-$ , 245  $[M + HCOO]^-$ .  $^1H$  NMR (400 MHz,  $CDCl_3$ )  $\delta$ : 5.97 (1H, br s, 8-NH), 4.07 (1H, br t, *J* = 8.1 Hz, H-6), 3.96 (1H, br s, H-9), 3.67–3.50 (2H, H<sub>2</sub>-3), 2.42–2.35 (1H, m, H-10), 2.35–2.26 (1H, m, Ha-5), 2.10–1.97 (2H, m, Ha-4, Hb-5), 1.96–1.82 (1H, m, Hb-4), 1.48–1.36 (1H, m, Ha-11), 1.26–1.10 (1H, m, Hb-11), 1.05 (3H, d, *J* = 7.2 Hz, H<sub>3</sub>-13), 0.92 (3H, t, *J* = 7.4 Hz, H<sub>3</sub>-12).  $^{13}C$  NMR (100 MHz,  $CDCl_3$ )  $\delta$ : 170.0 (C-1), 165.1 (C-7), 60.6 (C-9), 58.9 (C-6), 45.3 (C-3), 35.4 (C-10), 28.7 (C-5), 24.1 (C-11), 22.5 (C-4), 16.1 (C-13), 12.2 (C-12).

Cyclo(L-Leu-L-Pro) (**5**): Crystalline powder (MeOH), m.p. 148–149 °C,  $[\alpha]_D^{25} +105.8$  (*c* 0.77, MeOH). Positive ion ESIMS *m/z*: 211  $[M + H]^+$ , 233  $[M + Na]^+$ ; negative ion ESIMS *m/z*: 209  $[M - H]^-$ , 255  $[M + HCOO]^-$ .  $^1H$  NMR (400 MHz,  $CDCl_3$ )  $\delta$ : 6.18 (1H, s, 8-NH), 4.11 (1H, t, *J* = 7.5 Hz, H-6), 4.01 (1H, dd, *J* = 9.6, 3.4 Hz, H-9), 3.63–3.49 (2H, m, H<sub>2</sub>-3), 2.34 (1H, dtd, *J* = 9.7, 6.8, 2.9 Hz, Hb-5), 2.18–1.97 (3H, m, Hb-4, Ha-5, Ha-10), 1.96–1.84 (1H, m, Ha-4), 1.82–1.69 (1H, m, H-11), 1.52 (1H, ddd, *J* = 14.5, 9.6, 4.9 Hz, Hb-10), 0.99 (3H, d, *J* = 6.6 Hz, H<sub>3</sub>-13), 0.94 (3H, d, *J* = 6.6 Hz, H<sub>3</sub>-12).  $^{13}C$  NMR (100 MHz,  $CDCl_3$ )  $\delta$ : 170.4 (C-1), 166.3 (C-7), 59.1 (C-6), 53.5 (C-9), 45.6 (C-3), 38.7 (C-10), 28.2 (C-5), 24.8 (C-11), 23.4 (C-4), 22.9 (C-12), 21.3 (C-13).

3 $\beta$ ,5 $\alpha$ ,9 $\alpha$ -Trihydroxy-(22*E*,24*R*)-ergosta-7,22-dien-6-one (**6**): Crystalline powder ( $CH_2Cl_2$ ), m.p. 218–219 °C.  $[\alpha]_D^{25} -37$  (*c* 0.22,  $CHCl_3$ ). Positive ion ESIMS *m/z*: 467  $[M + Na]^+$ , 483  $[M + K]^+$ ; negative ion ESIMS *m/z*: 443  $[M - H]^-$ , 479  $[M + Cl]^-$ .  $^1H$  NMR (400 MHz,  $CD_3OD$ )  $\delta$ : 5.59 (1H, d,

$J = 2.0$  Hz, H-7), 5.27 (1H, dd,  $J = 15.2, 7.1$  Hz, H-23), 5.21 (1H, dd,  $J = 15.2, 7.7$  Hz, H-22), 3.97–3.89 (1H, m, H-3), 1.06 (3H, d,  $J = 6.6$  Hz, H<sub>3</sub>-21), 1.00 (3H, s, H<sub>3</sub>-19), 0.95 (3H, d,  $J = 6.8$  Hz, H<sub>3</sub>-28), 0.87 (3H, d,  $J = 7.0$  Hz, H<sub>3</sub>-27), 0.85 (3H, d,  $J = 7.0$  Hz, H<sub>3</sub>-26), 0.67 (3H, s, H<sub>3</sub>-18). <sup>13</sup>C NMR (100 MHz, CD<sub>3</sub>OD)  $\delta$ : 200.1 (C-6), 165.0 (C-8), 136.7 (C-22), 133.6 (C-23), 120.9 (C-7), 80.2 (C-5), 76.1 (C-9), 67.8 (C-3), 57.4 (C-17), 52.8 (C-14), 46.2 (C-13), 44.4 (C-24), 42.7 (C-10), 41.7 (C-20), 37.1 (C-4), 36.2 (C-12), 34.4 (C-25), 31.0 (C-2), 29.3 (C-11), 29.1 (C-16), 26.6 (C-1), 23.4 (C-15), 21.6 (C-21), 20.54 (C-19), 20.47 (C-26), 20.1 (C-27), 18.2 (C-28), 12.6 (C-18).

**Figure S1.** HPLC-PDAD-UV analysis of the EtOAc extracts of the control ZBY-3 strain and selected mutants. (A) HPLC profiles detected at 210 nm; (B) Enlarged HPLC profiles detected at 210 nm (from 35 min to 60 min); (C) HPLC profiles detected at 254 nm; (D) Enlarged HPLC profiles detected at 254 nm (from 35 min to 60 min); (E) HPLC profiles detected at 290 nm; (F) Enlarged HPLC profiles detected at 290 nm (from 35 min to 60 min); (G1) UV spectra of selected new peaks in the mutant extracts, and UV absorptions of the control G59 extract at the corresponding retention times ( $t_R$ ); (G2) UV spectra of selected new peaks in the mutant extracts, and UV absorptions of the control G59 extract at the corresponding retention times ( $t_R$ ).

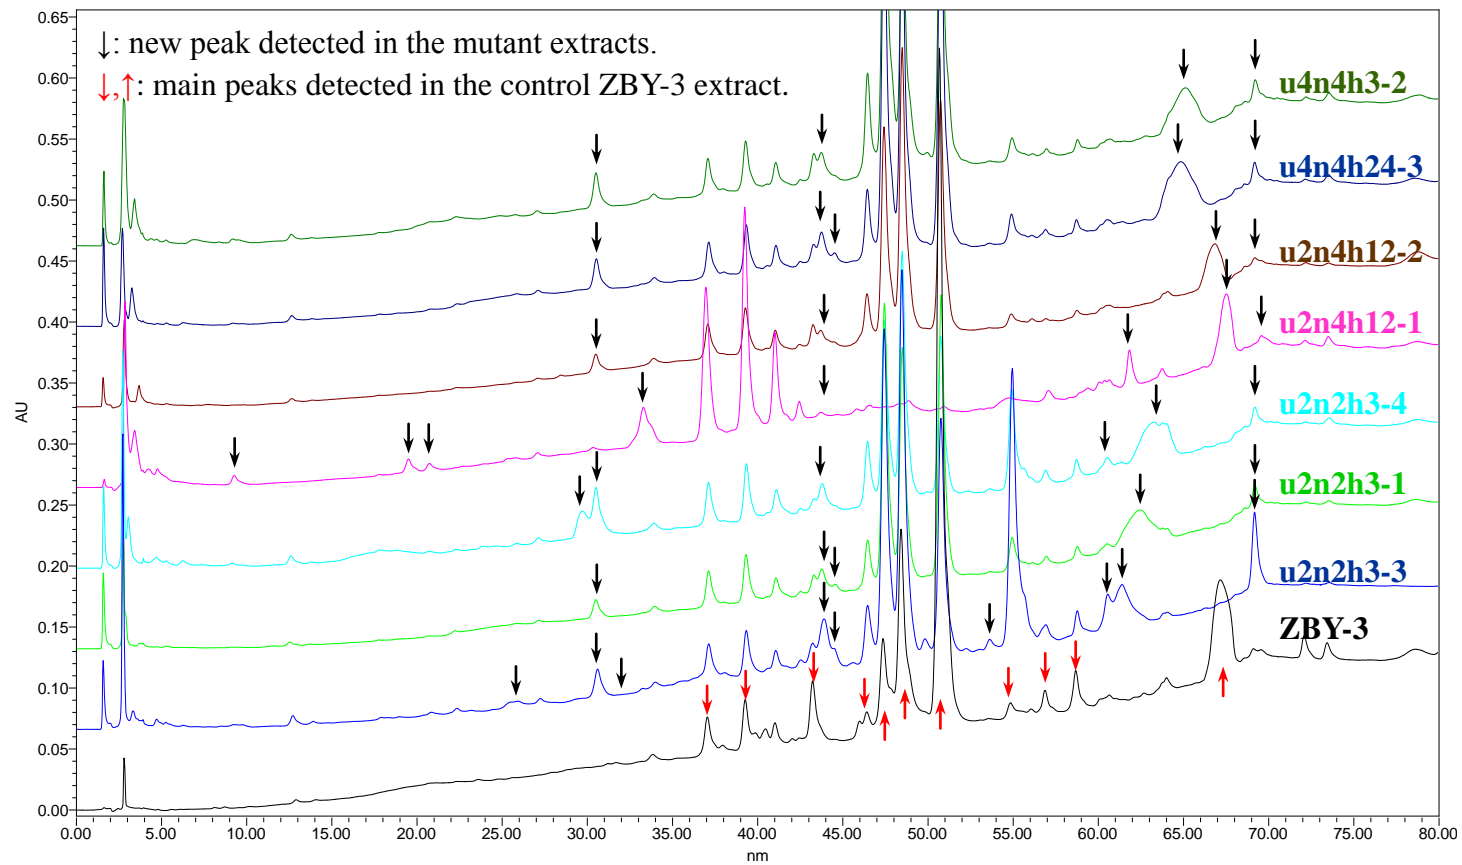

(A)

Figure S1. Cont.

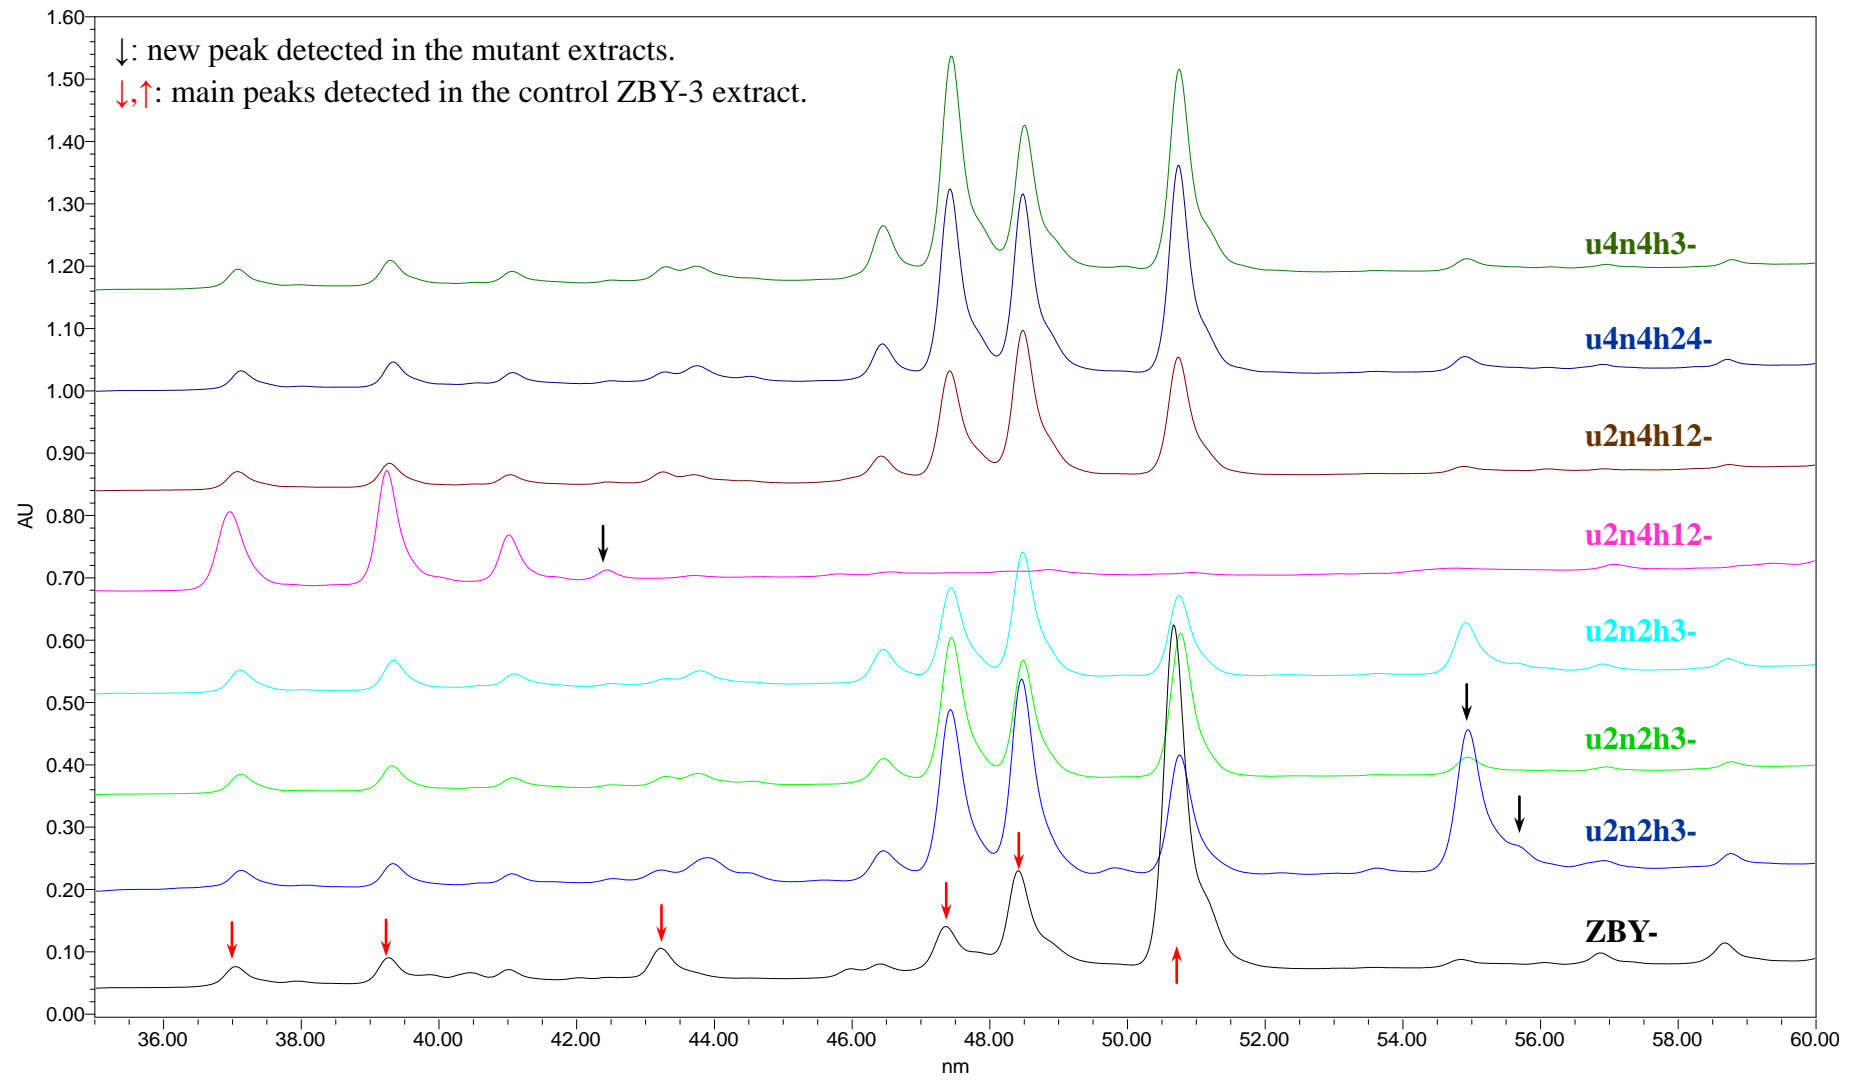

(B)

Figure S1. Cont.

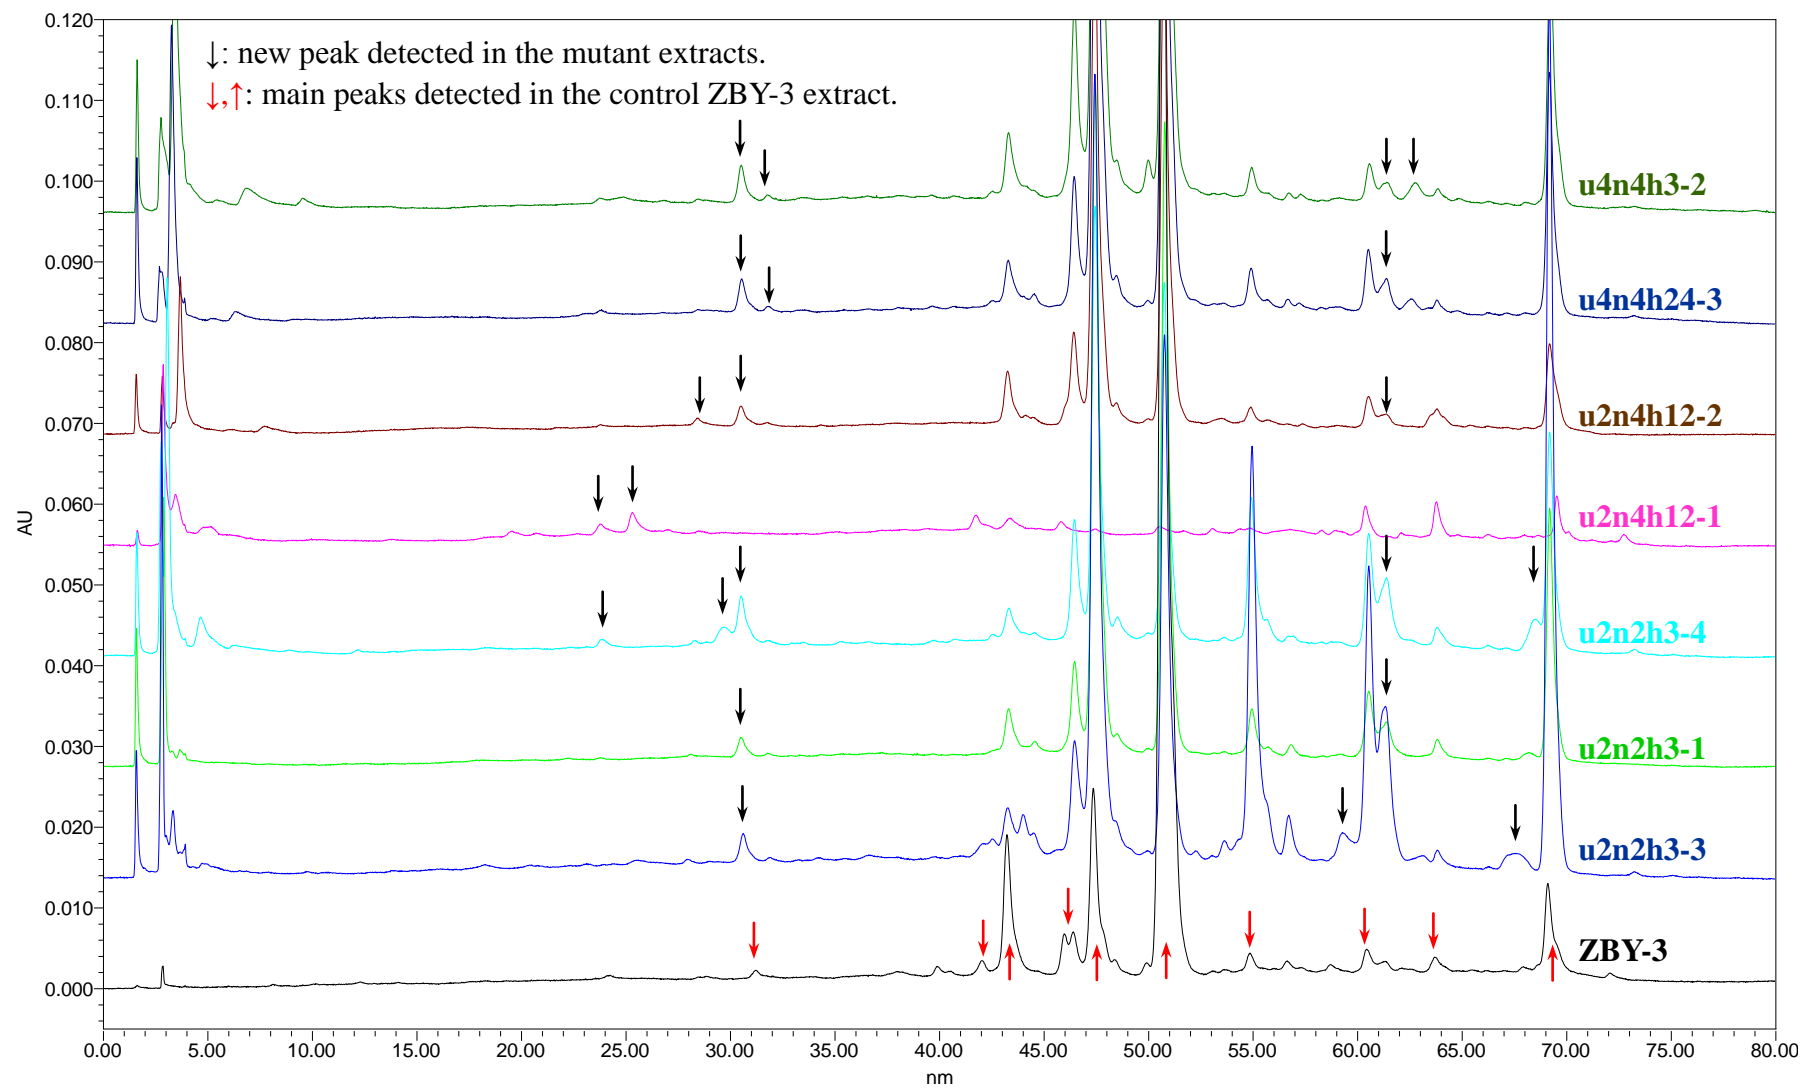

(C)

Figure S1. Cont.

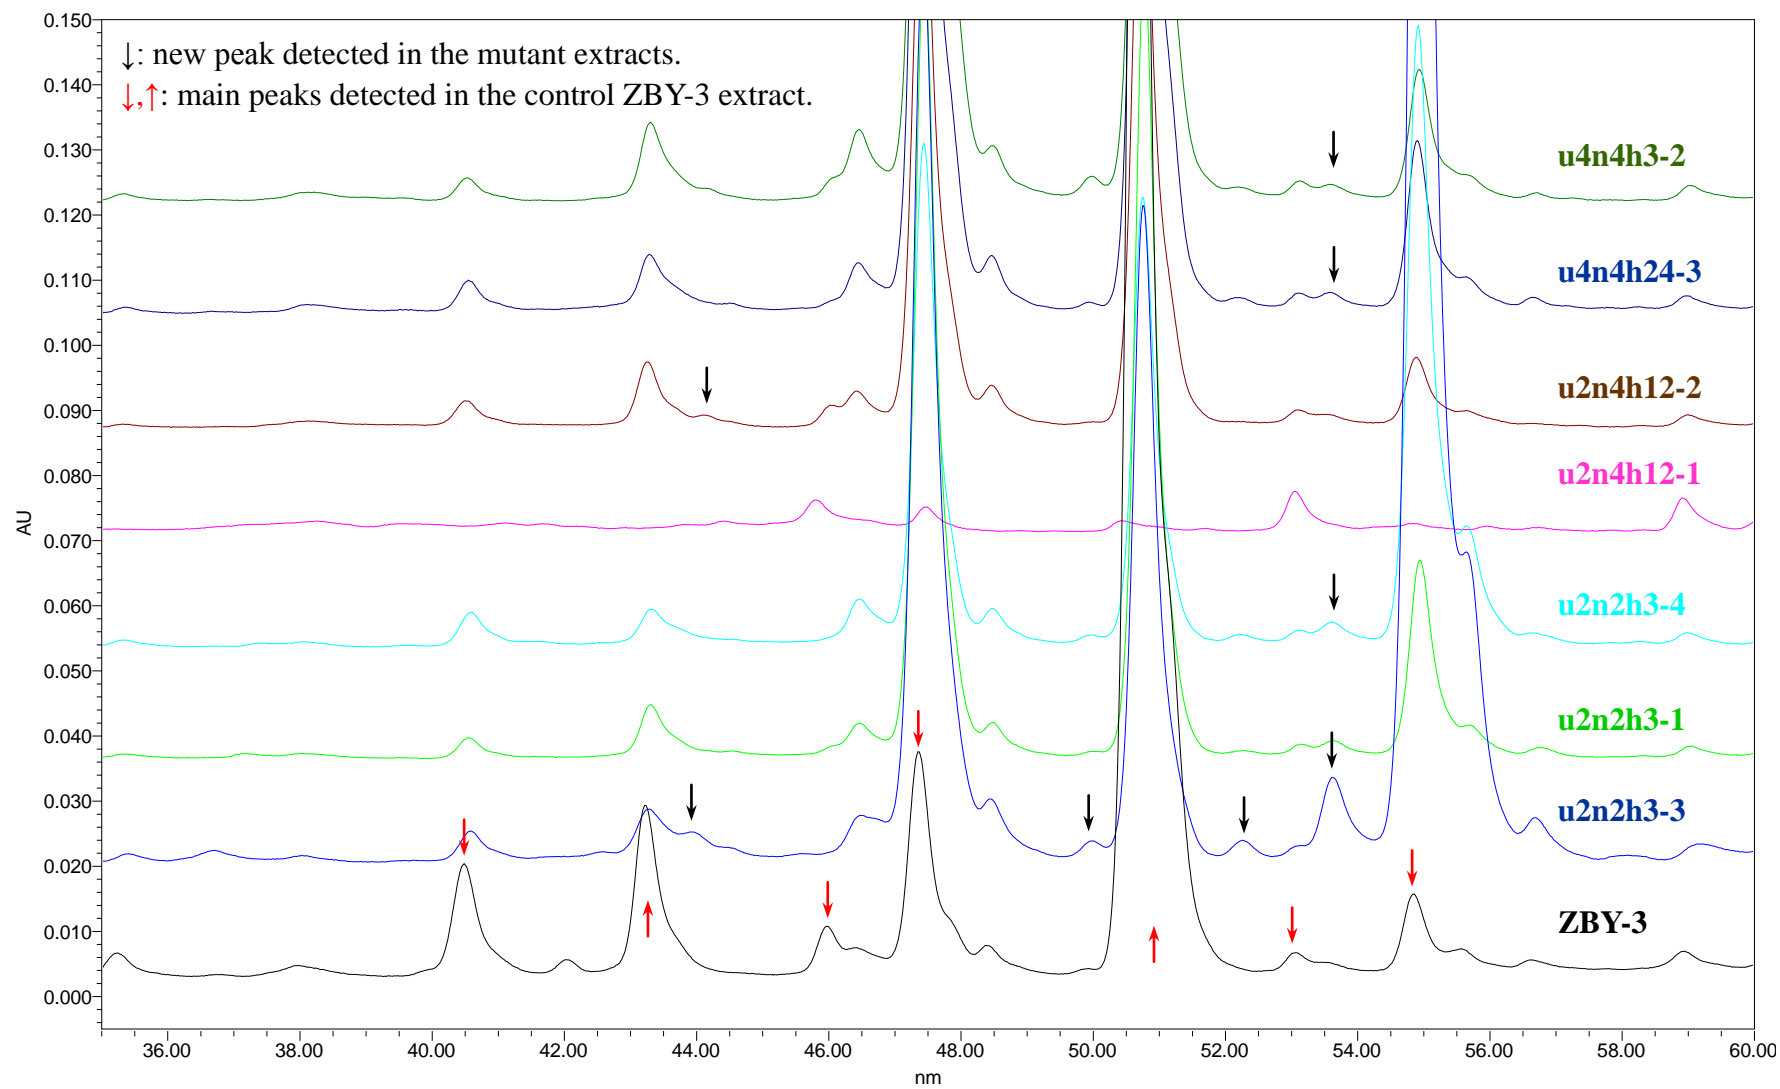

(D)

Figure S1. Cont.

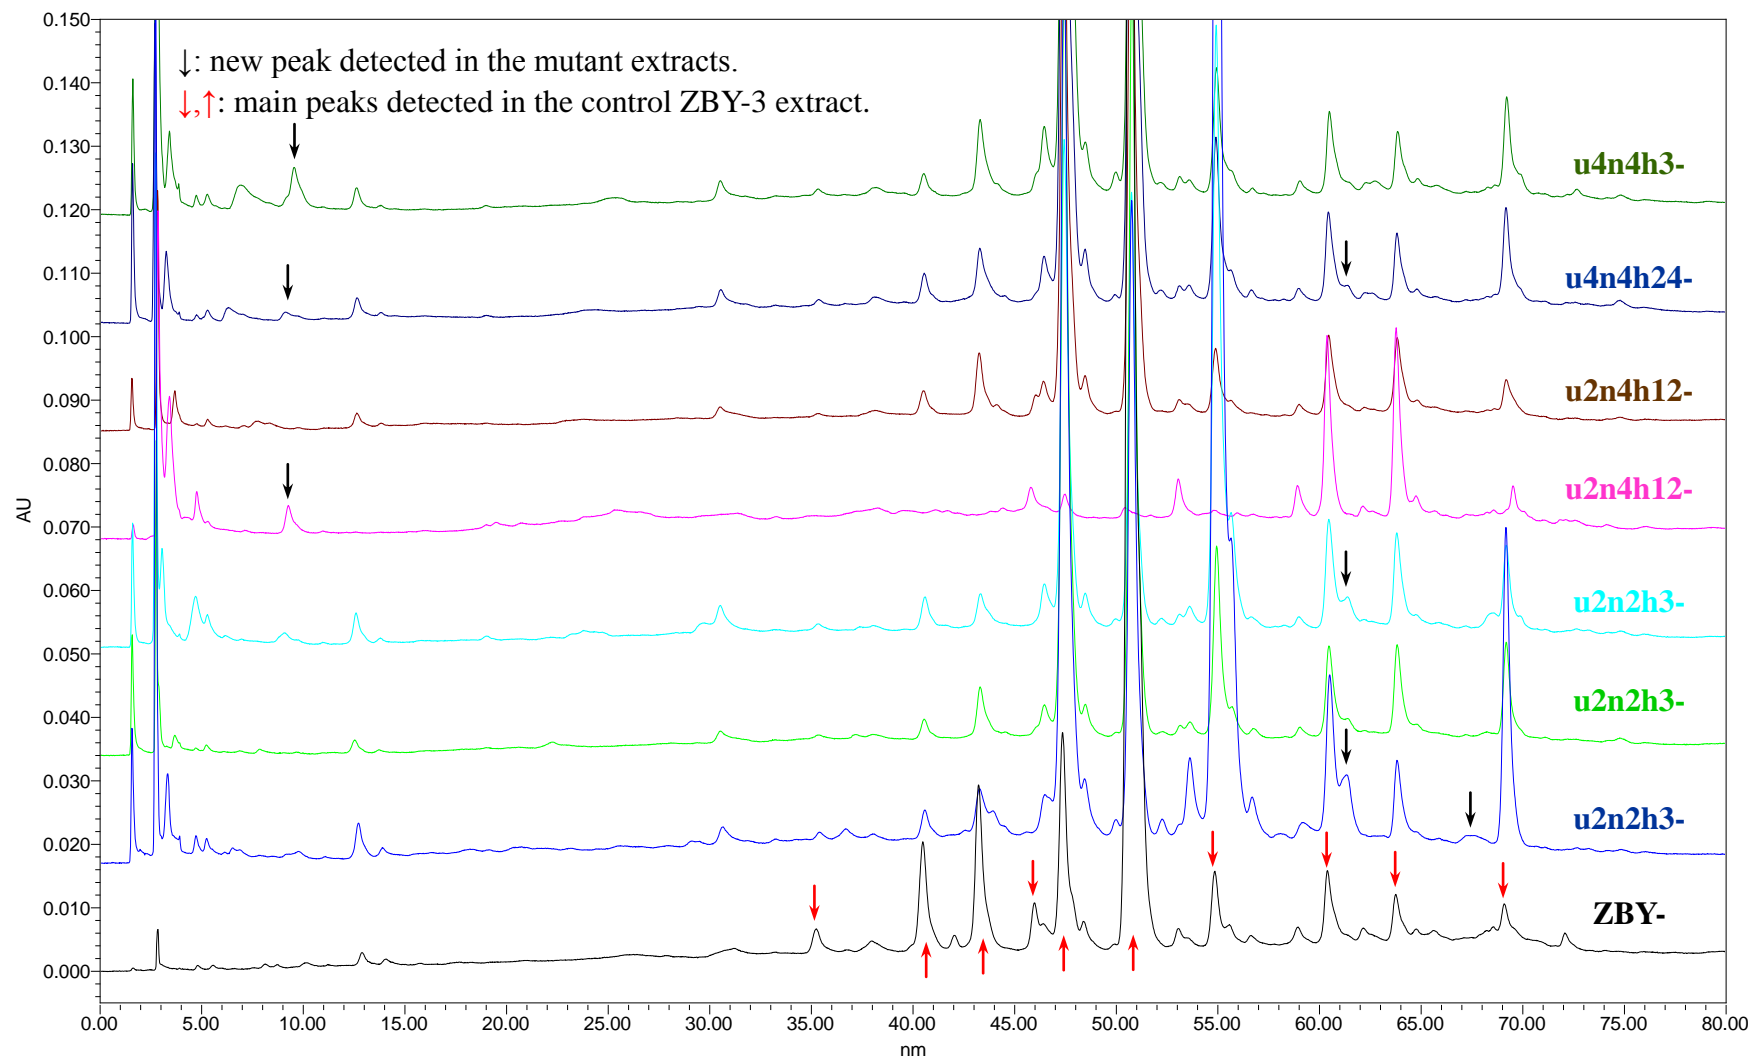

(E)



Figure S1. Cont.

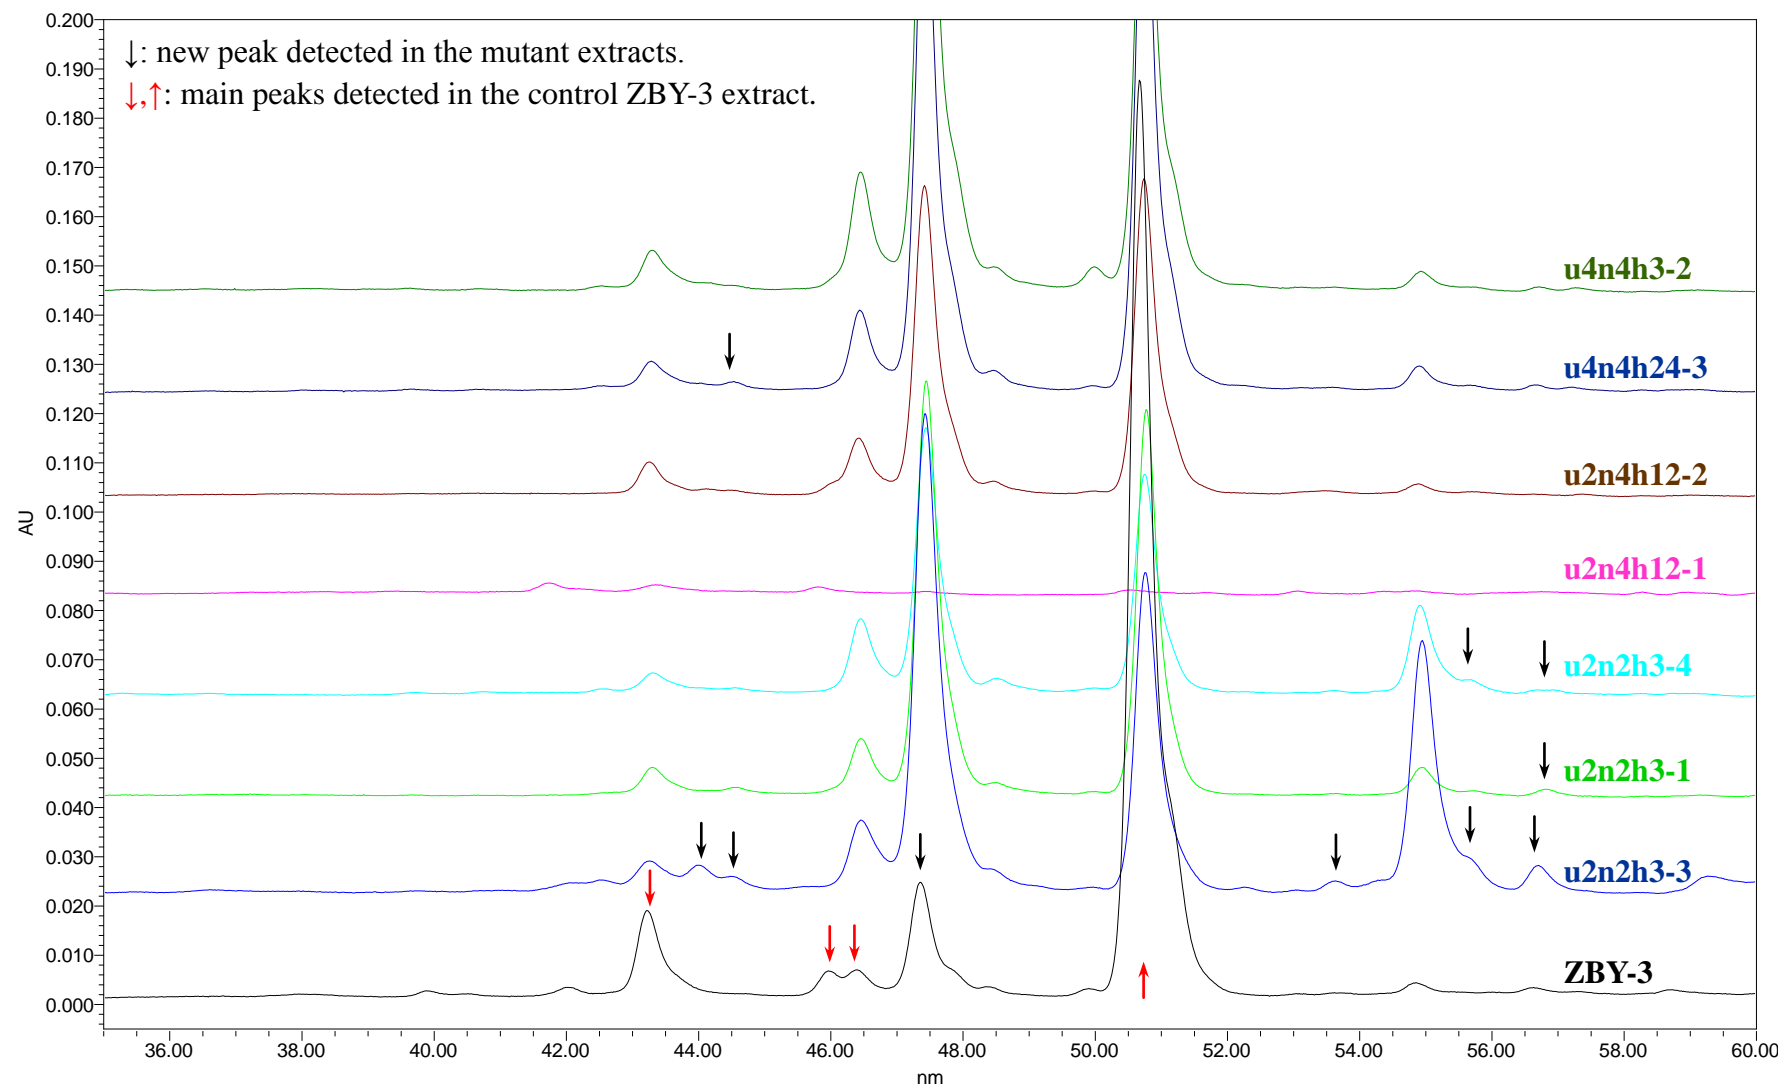

(F)

Figure S1. Cont.

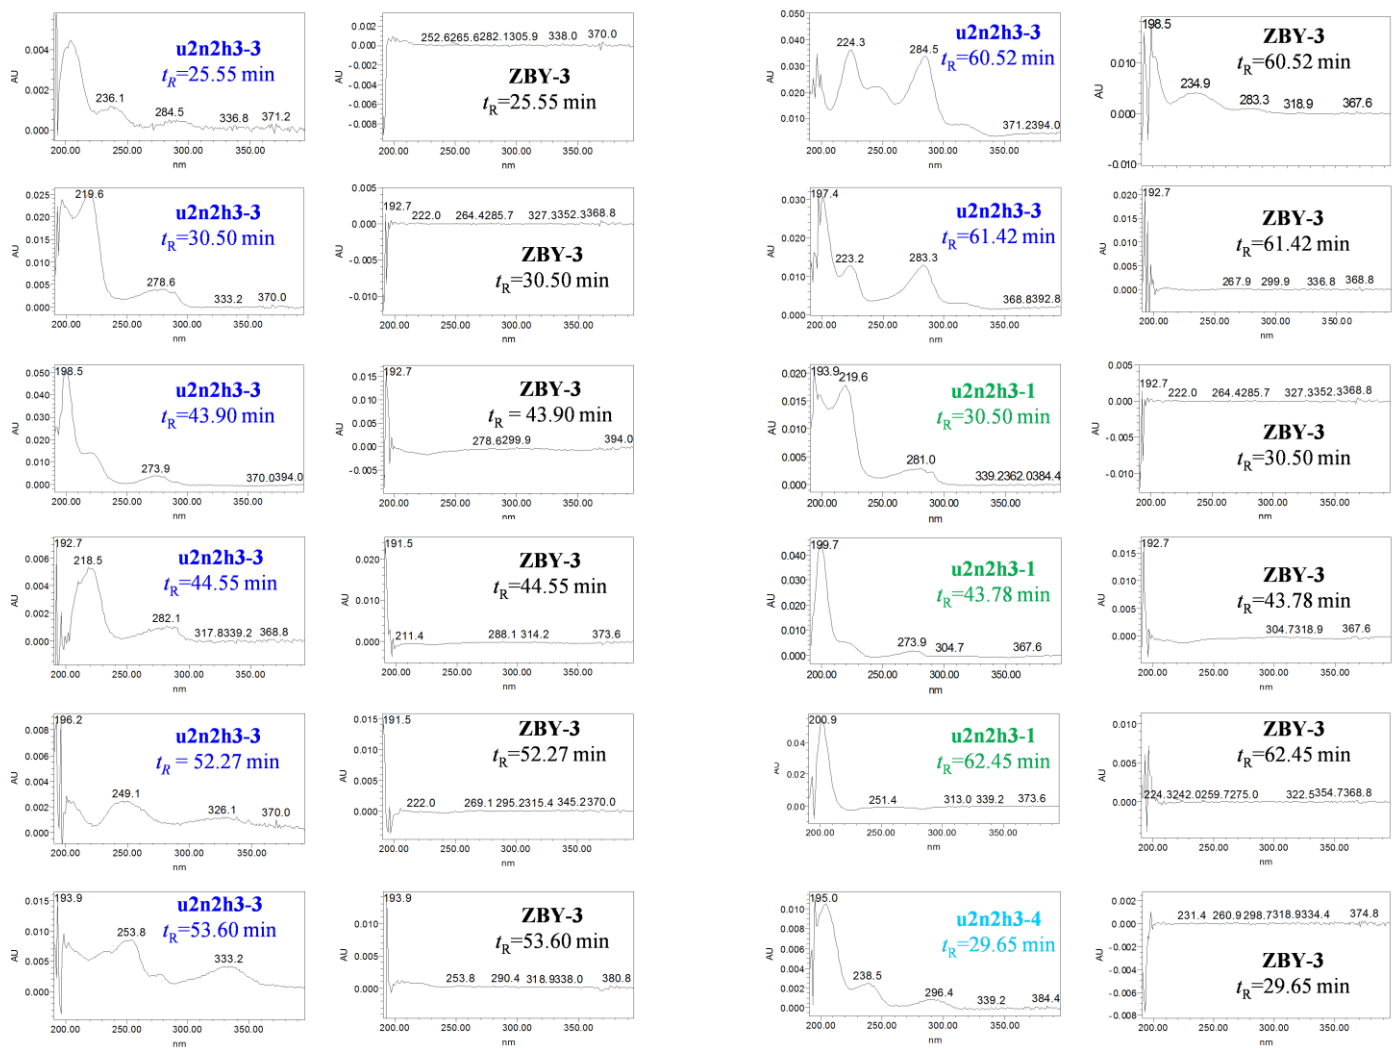

(G1)

Figure S1. Cont.

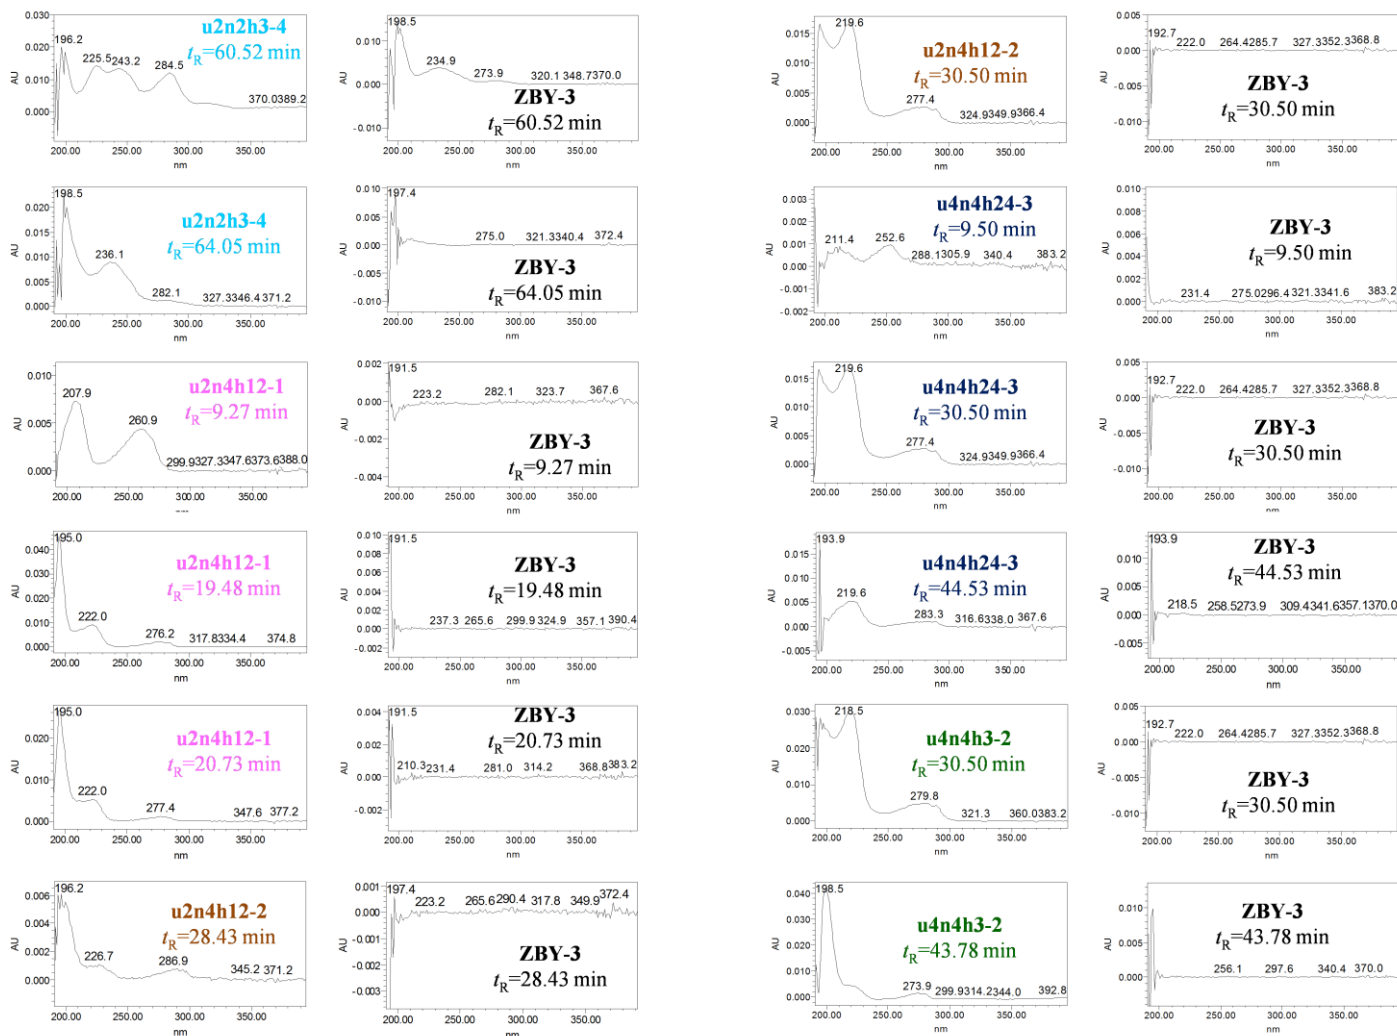

(G2)

**Figure S2.** HPLC-ESI-MS analysis of the EtOAc extracts of the control ZBY-3 strain and selected mutants. **(A)** Total ion chromatograms detected by positive ESI-MS; **(B1)** Total ion chromatograms detected by negative ESI-MS; **(B2)** Total ion chromatograms (TIC) for the ZBY-3 strain and a mutant u2n2h3-3; **(C1)** Extracted positive ion ( $m/z$  200.0–300.0) chromatograms; **(C2)** Extracted positive ion ( $m/z$  300.0–400.0) chromatograms; **(C3)** Extracted positive ion ( $m/z$  400.0–500.0) chromatograms; **(C4)** Extracted positive ion ( $m/z$  500.0–600.0) chromatograms; **(C5)** Extracted positive ion ( $m/z$  600.0–700.0) chromatograms; **(C6)** Extracted positive ion ( $m/z$  700.0–800.0) chromatograms; **(C7)** Extracted positive ion ( $m/z$  800.0–900.0) chromatograms; **(C8)** Extracted positive ion ( $m/z$  900.0–1000.0) chromatograms; **(D1)** Extracted negative ion ( $m/z$  200.0–300.0) chromatograms; **(D2)** Extracted negative ion ( $m/z$  300.0–400.0) chromatograms; **(D3)** Extracted negative ion ( $m/z$  400.0–500.0) chromatograms; **(D4)** Extracted negative ion ( $m/z$  500.0–600.0) chromatograms; **(D5)** Extracted negative ion ( $m/z$  600.0–700.0) chromatograms; **(D6)** Extracted negative ion ( $m/z$  700.0–800.0) chromatograms; **(D7)** Extracted negative ion ( $m/z$  800.0–900.0) chromatograms; **(D8)** Extracted negative ion ( $m/z$  900.0–1000.0) chromatograms; **(E1)** Extracted ion chromatograms (EIC,  $m/z$  200.0–300.0) for the ZBY-3 strain and a mutant u2n2h3-3; **(E2)** Extracted ion chromatograms (EIC,  $m/z$  300.0–400.0) for the ZBY-3 strain and a mutant u2n2h3-3; **(E3)** Extracted ion chromatograms (EIC,  $m/z$  400.0–500.0) for the ZBY-3 strain and a mutant u2n2h3-3; **(E4)** Extracted ion chromatograms (EIC,  $m/z$  500.0–600.0) for the ZBY-3 strain and a mutant u2n2h3-3; **(E5)** Extracted ion chromatograms (EIC,  $m/z$  600.0–700.0) for the ZBY-3 strain and a mutant u2n2h3-3; **(E6)** Extracted ion chromatograms (EIC,  $m/z$  700.0–800.0) for the ZBY-3 strain and a mutant u2n2h3-3; **(E7)** Extracted ion chromatograms (EIC,  $m/z$  800.0–900.0) for the ZBY-3 strain and a mutant u2n2h3-3; **(E8)** Extracted ion chromatograms (EIC,  $m/z$  900.0–1000.0) for the ZBY-3 strain and a mutant u2n2h3-3; **(F1)** HPLC-positive ion ESI-MS analysis ( $m/z$  300.0–400.0;  $t_R = 25.71$ – $26.41$  min); **(F2)** HPLC-positive ion ESI-MS analysis ( $m/z$  500.0–600.0;  $t_R = 69.11$  min); **(F3)** HPLC-positive ion ESI-MS analysis ( $m/z$  700.0–800.0;  $t_R = 70.19$  min); **(F4)** HPLC-positive ion ESI-MS analysis ( $m/z$  700.0–800.0;  $t_R = 76.98$  min); **(F5)** HPLC-positive ion ESI-MS analysis ( $m/z$  300.0–400.0;  $t_R = 38.68$  min); **(F6)** HPLC-positive ion ESI-MS analysis ( $m/z$  500.0–600.0;  $t_R = 69.33$  min); **(F7)** HPLC-positive ion ESI-MS analysis ( $m/z$  200.0–300.0;  $t_R = 14.95$  and  $19.19$  min); **(F8)** HPLC-positive ion ESI-MS analysis ( $m/z$  300.0–400.0;  $t_R = 40.49$ ,  $46.68$  and  $51.12$  min); **(F9)** HPLC-positive ion ESI-MS analysis ( $m/z$  900.0–1000.0;  $t_R = 51.15$  and  $55.79$  min); **(F10)** HPLC-positive ion ESI-MS analysis ( $m/z$  200.0–300.0;  $t_R = 21.85$  and  $23.90$  min); **(F11)** HPLC-positive ion ESI-MS analysis ( $m/z$  400.0–500.0;  $t_R = 42.52$  and  $61.51$  min); **(F12)** HPLC-positive ion ESI-MS analysis ( $m/z$  300.0–400.0;  $t_R = 4.41$  and  $20.04$  min); **(F13)** HPLC-positive ion ESI-MS analysis ( $m/z$  300.0–400.0;  $t_R = 21.97$  and  $24.83$  min); **(F14)** HPLC-positive ion ESI-MS analysis ( $m/z$  400.0–500.0;  $t_R = 39.28$  and  $74.98$  min); **(F15)** HPLC-negative ion ESI-MS analysis ( $m/z$  300.0–400.0;  $t_R = 51.45$  and  $56.09$  min); **(F16)** HPLC-negative ion ESI-MS analysis ( $m/z$  300.0–500.0;  $t_R = 15.25$  and  $23.03$  min); **(F17)** HPLC-negative ion ESI-MS analysis ( $m/z$  500.0–700.0;  $t_R = 71.67$  and  $78.44$  min).

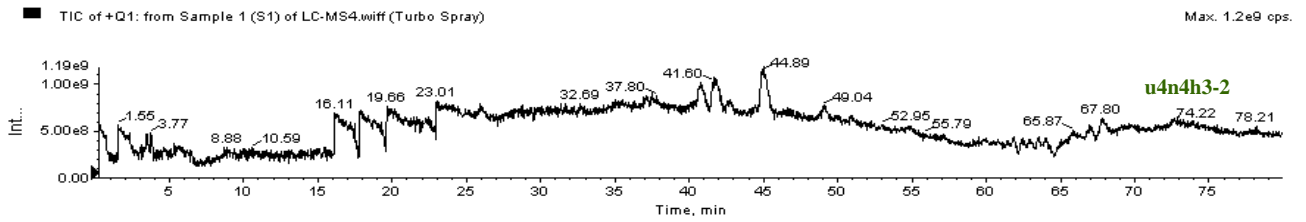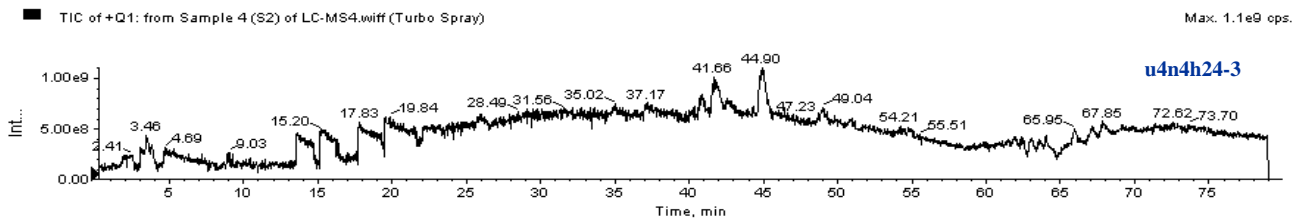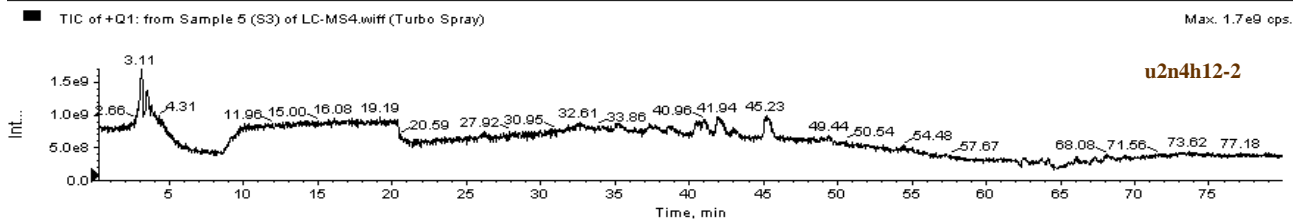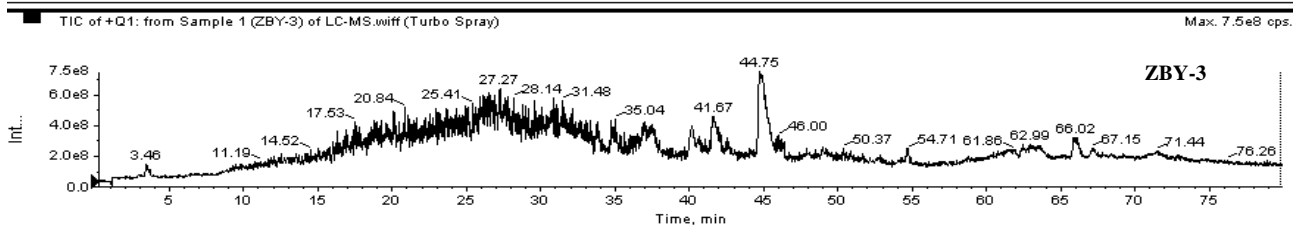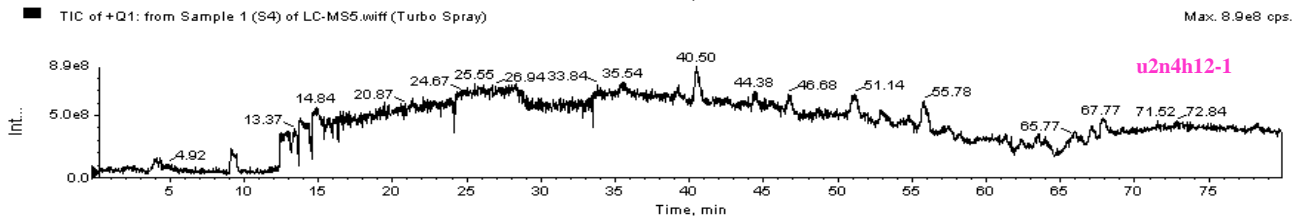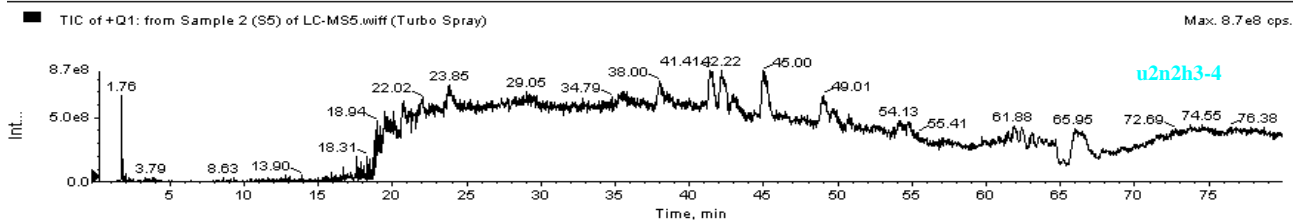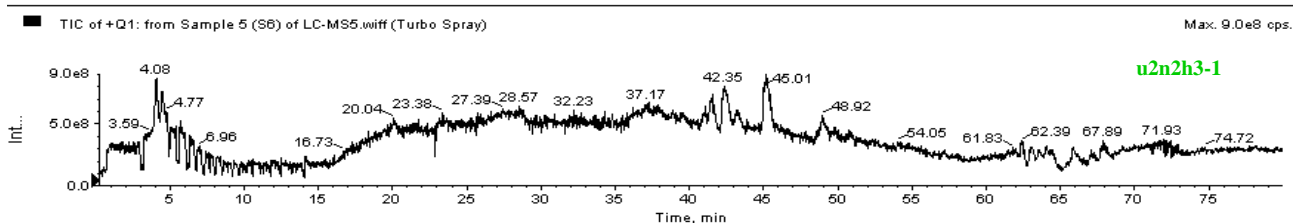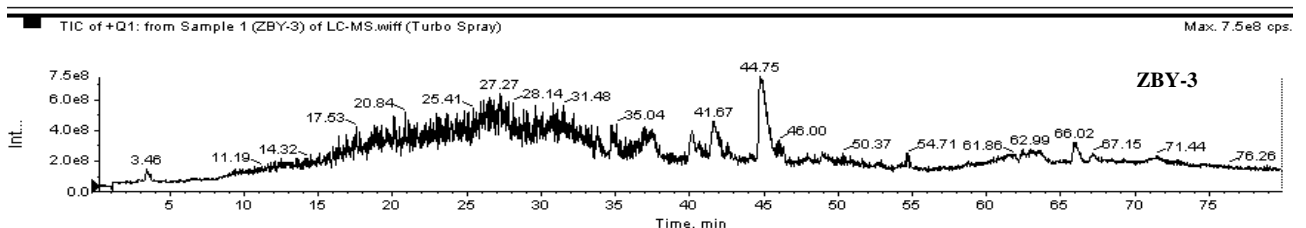

(A)

Figure S2. Cont.

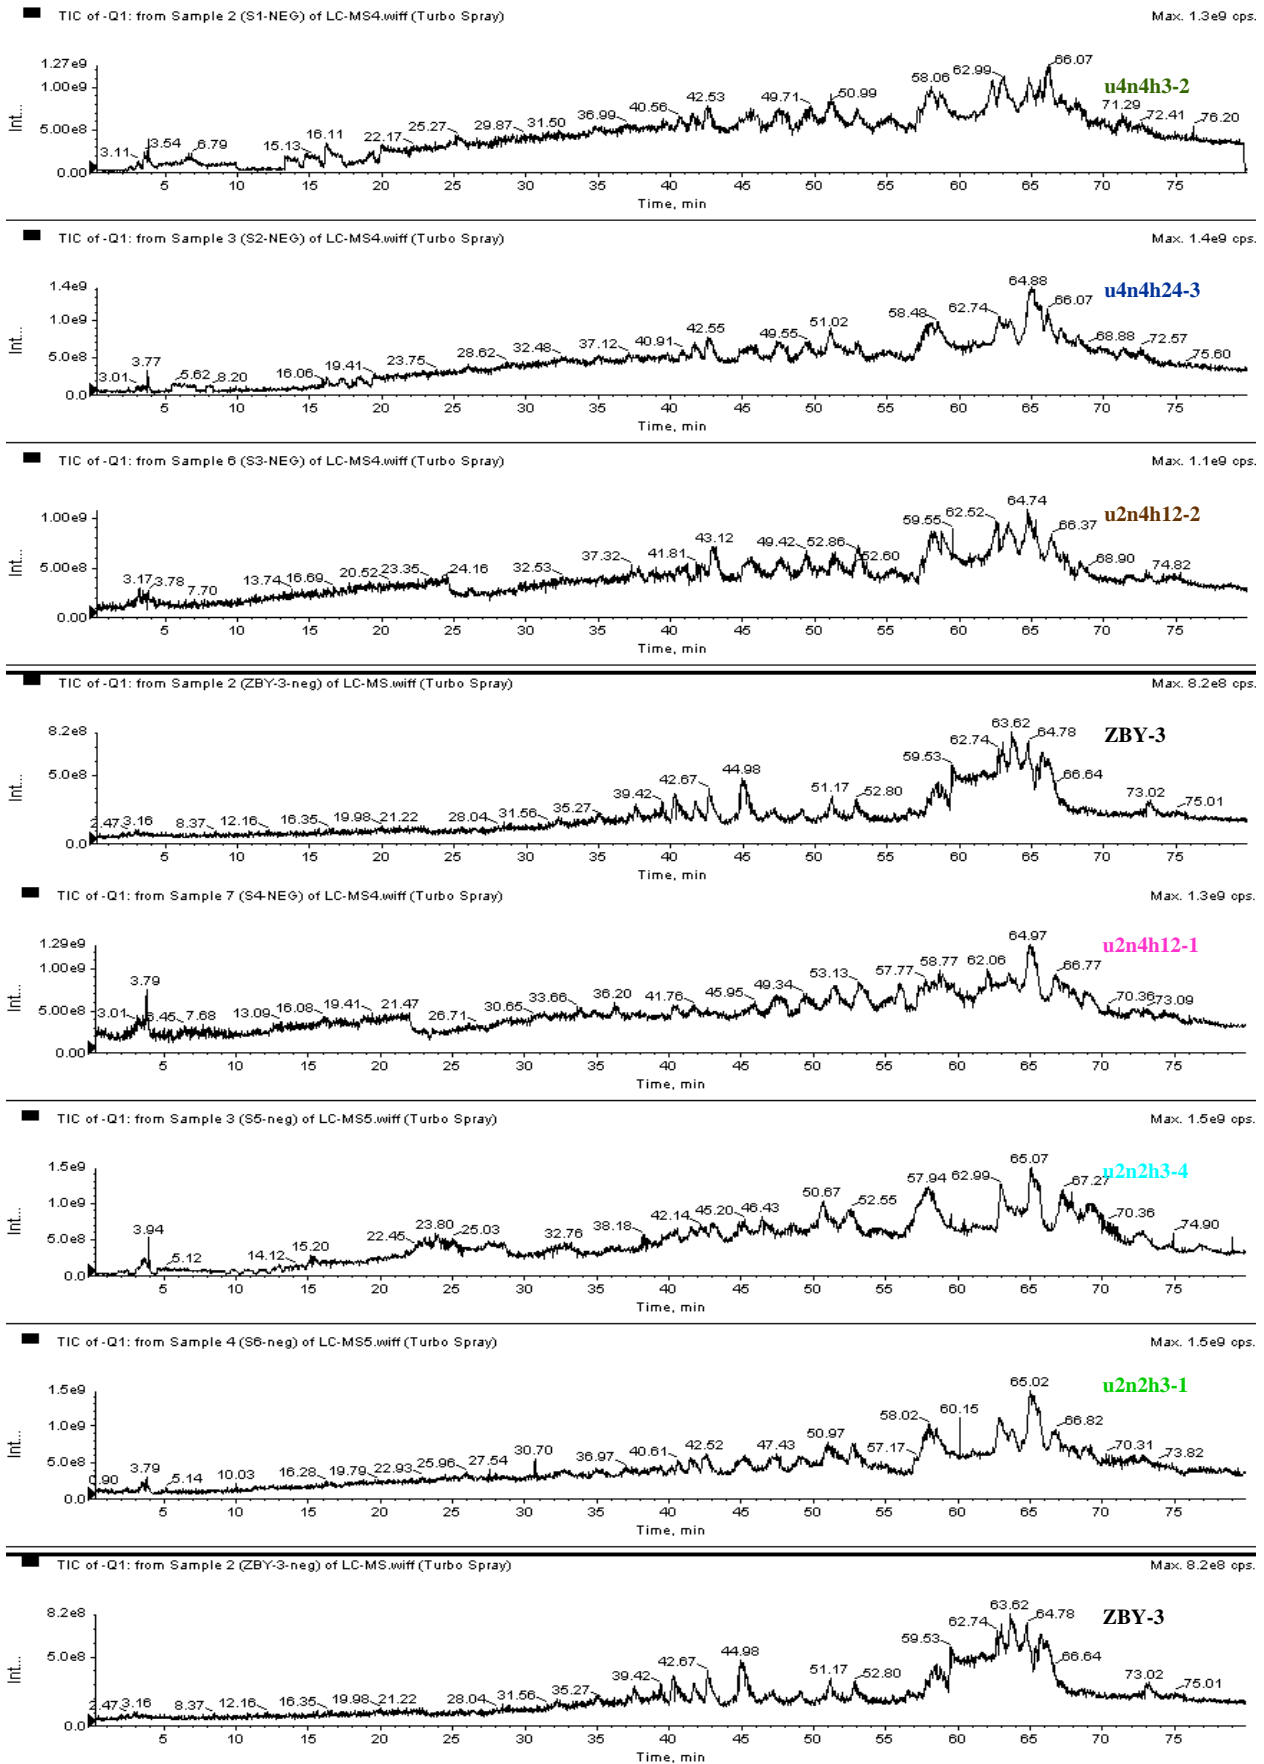

(B1)

Figure S2. Cont.

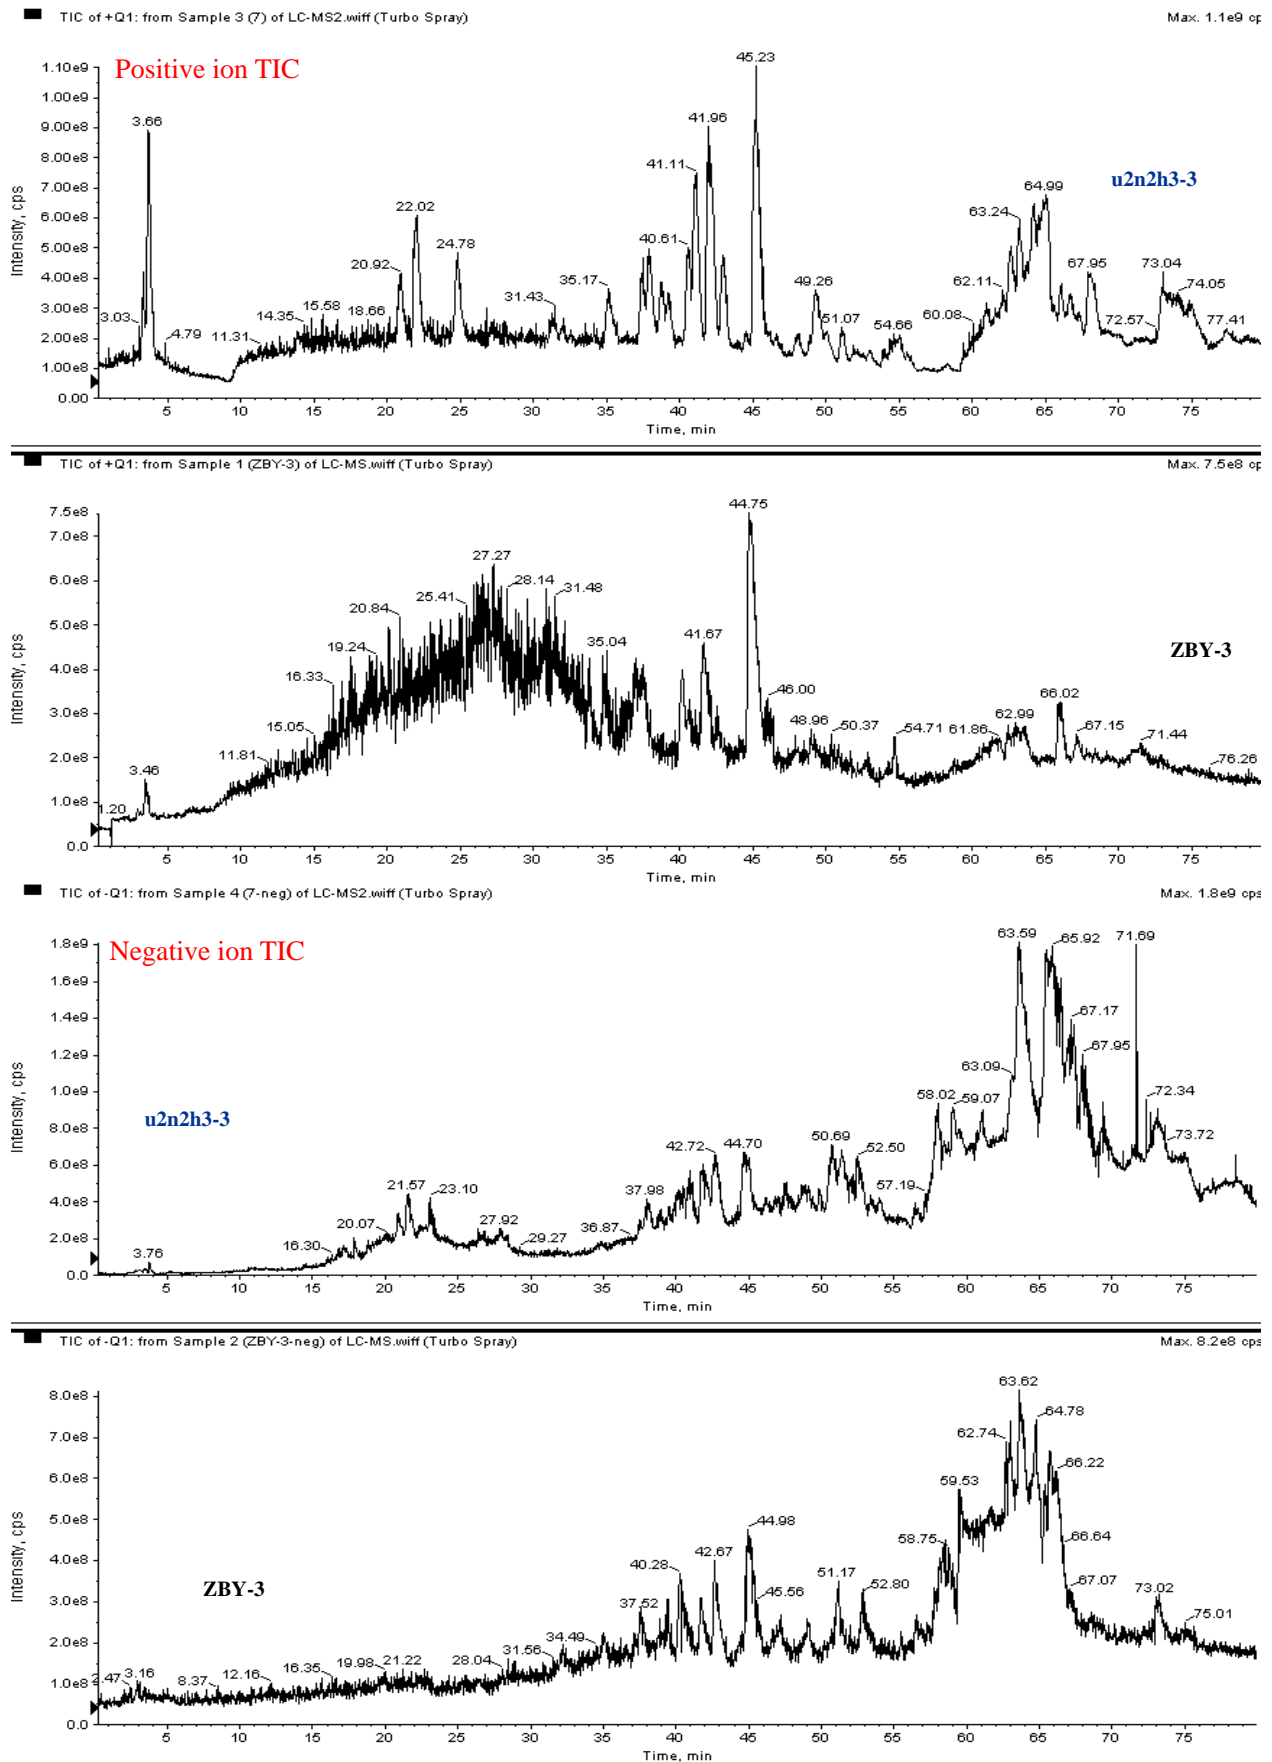

(B2)

Figure S2. Cont.

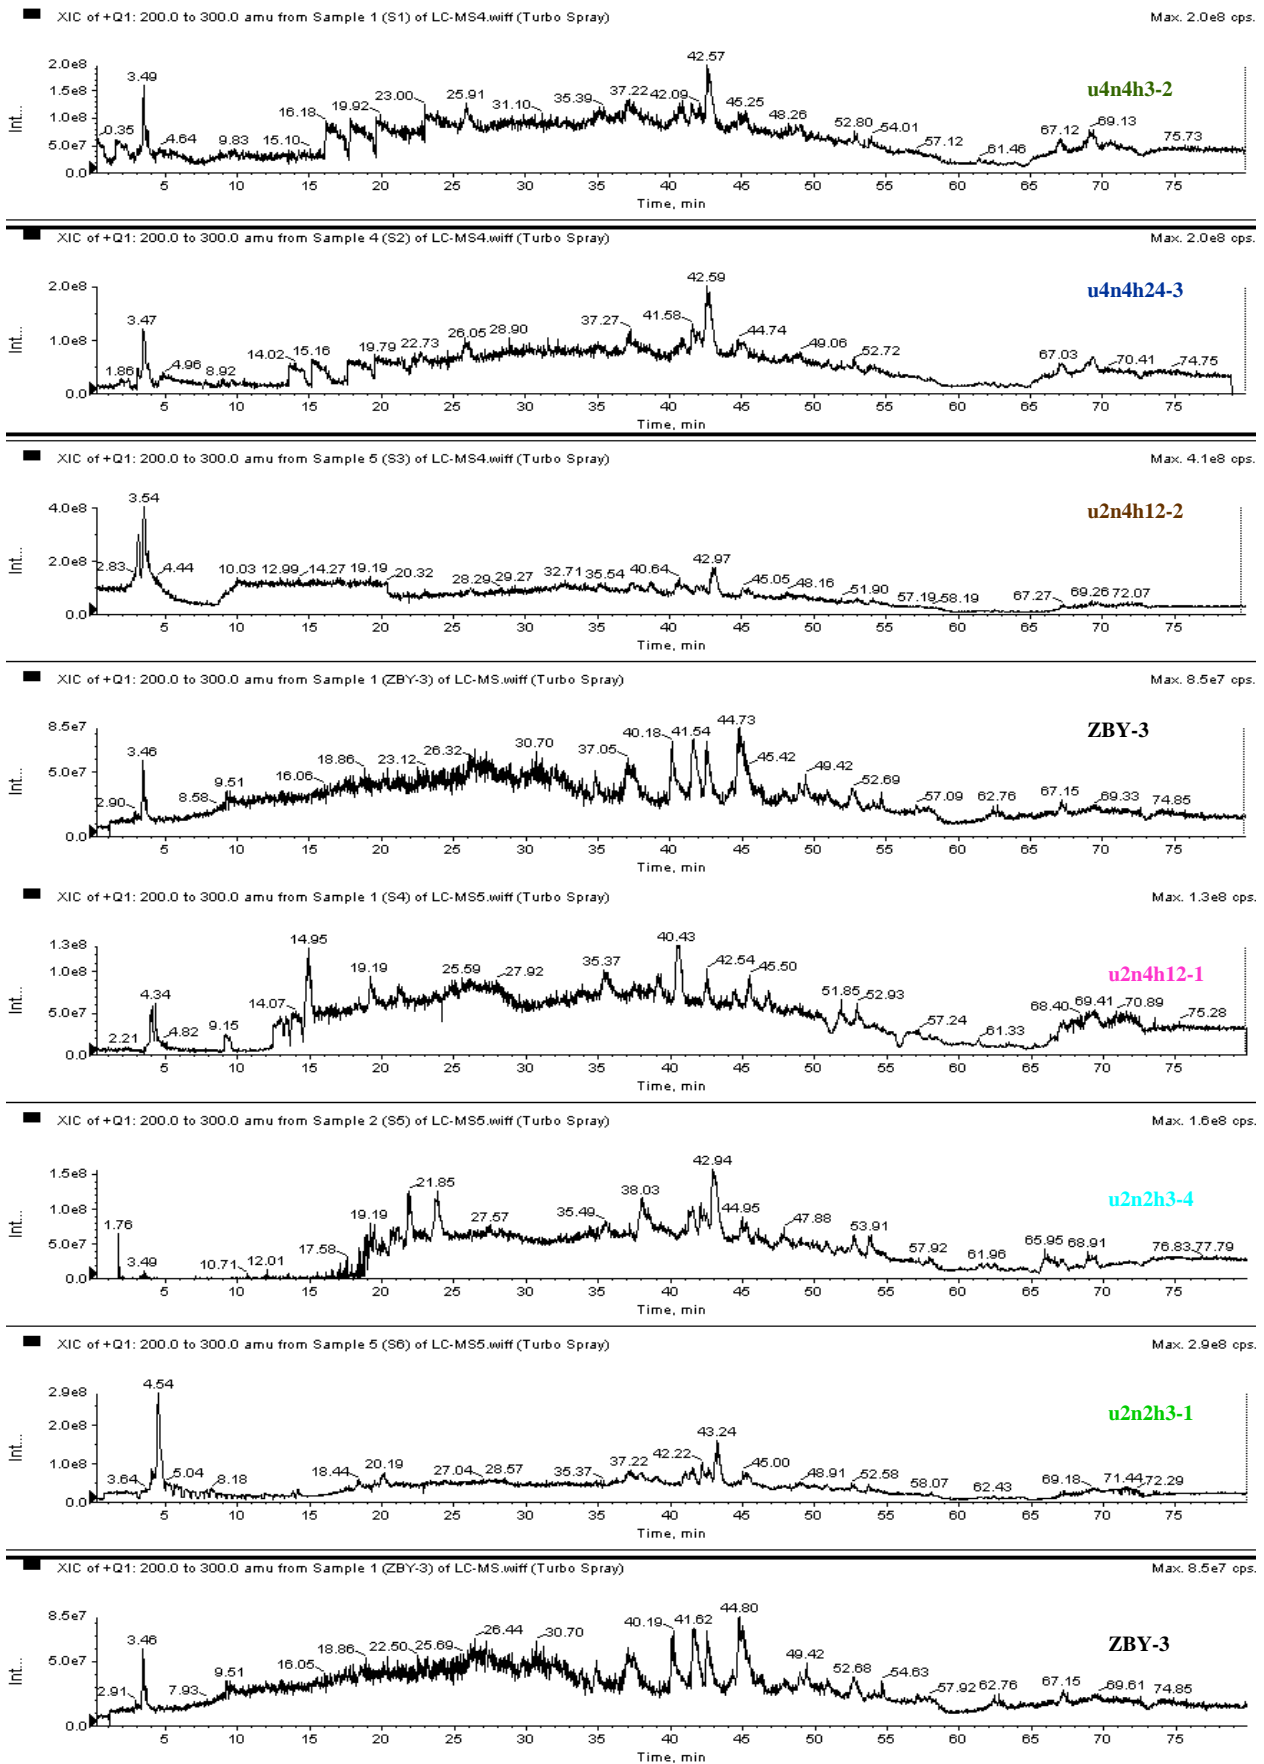

(C1)



Figure S2. Cont.

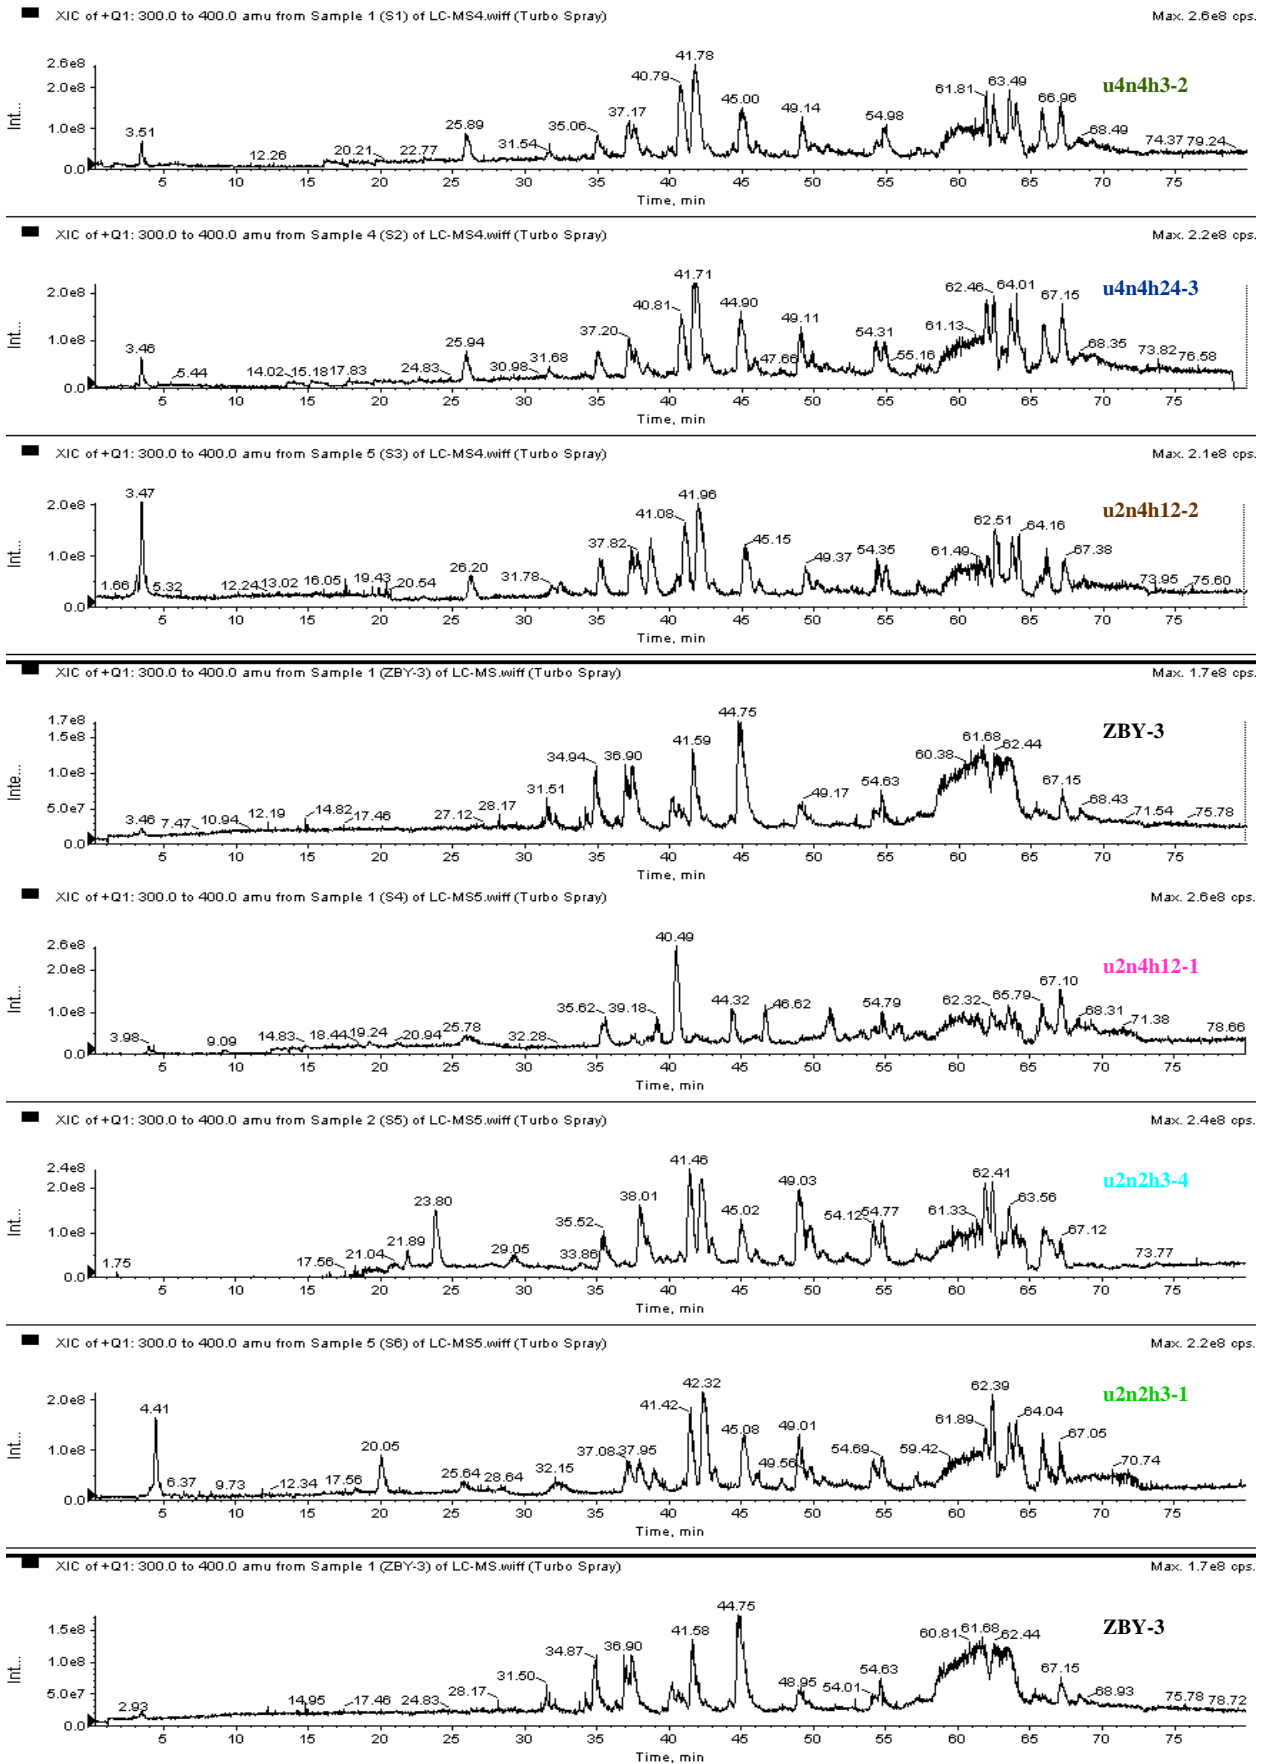

(C2)

Figure S2. Cont.

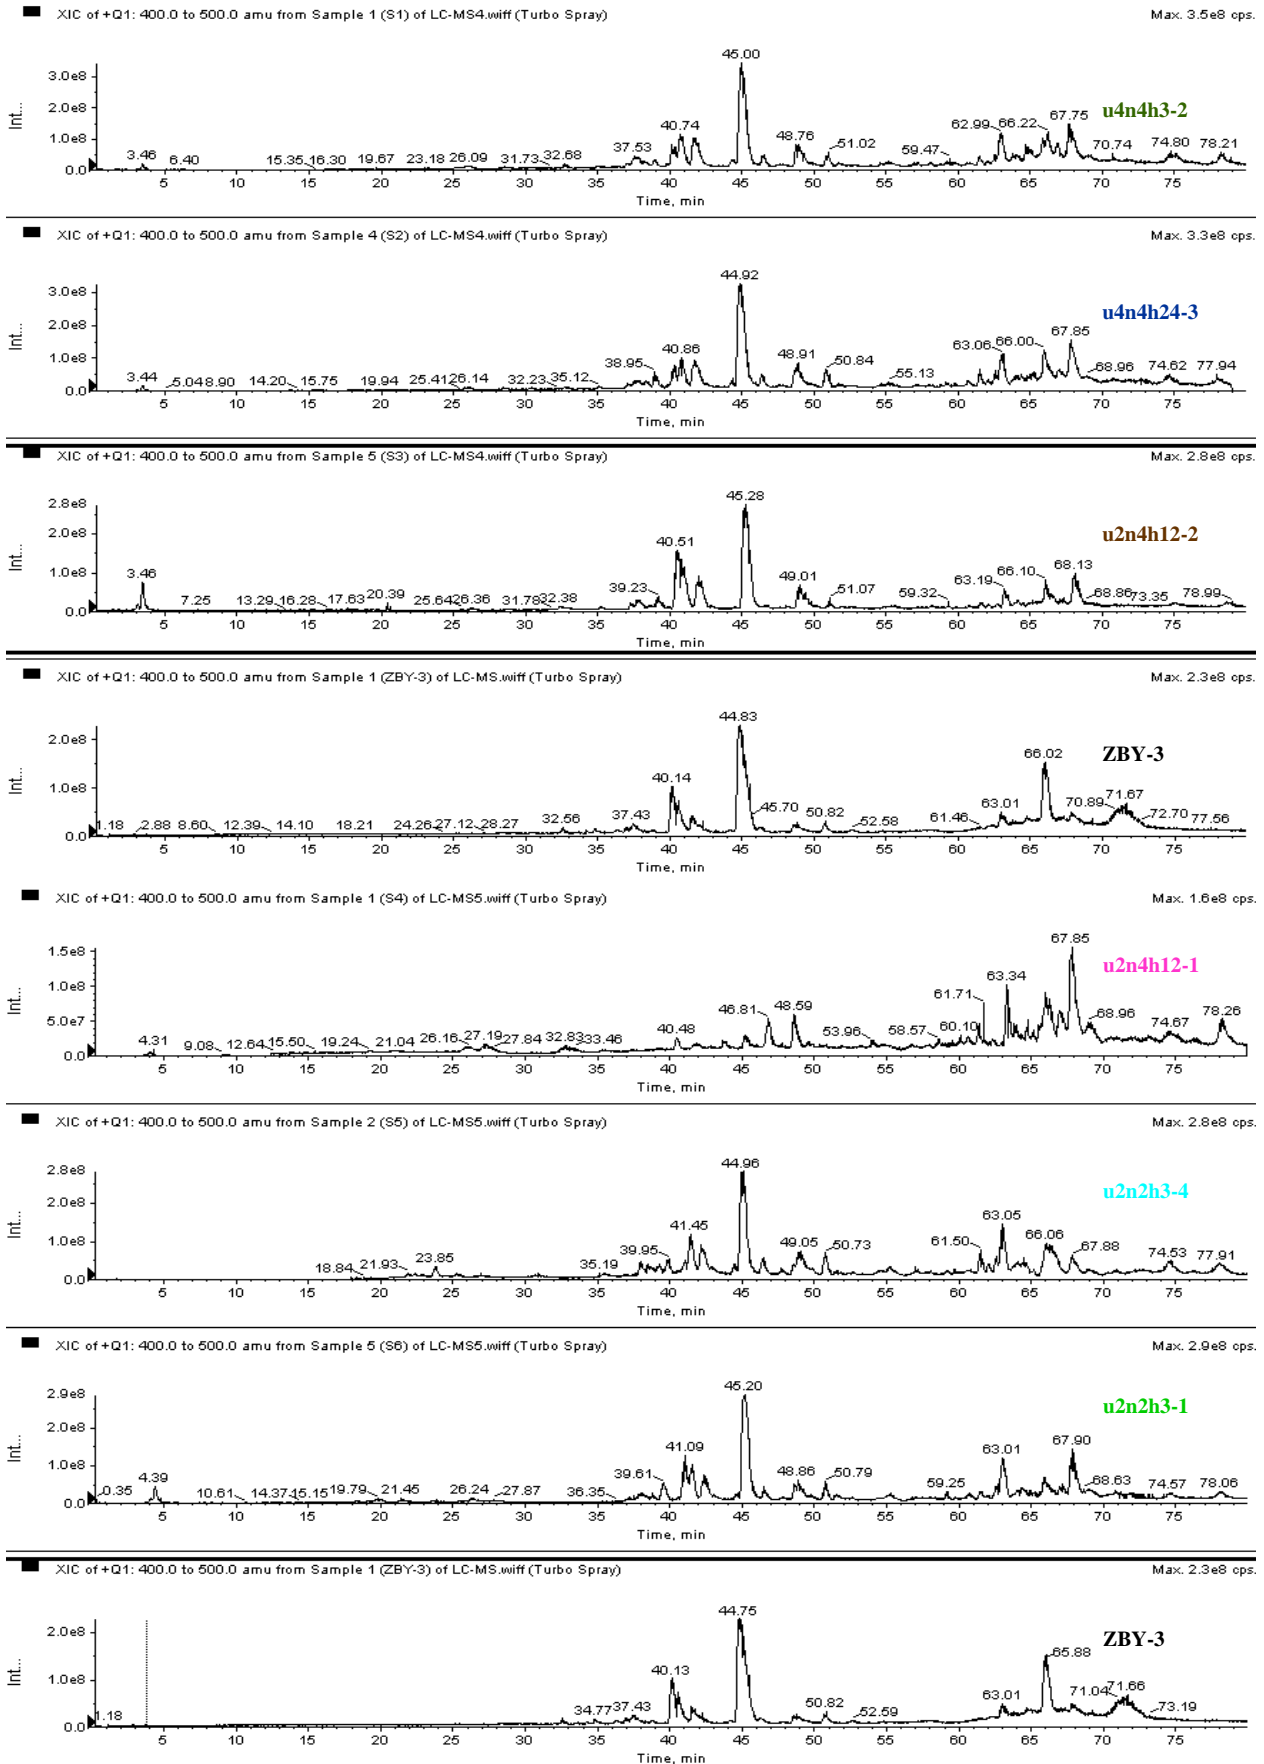

(C3)

Figure S2. Cont.

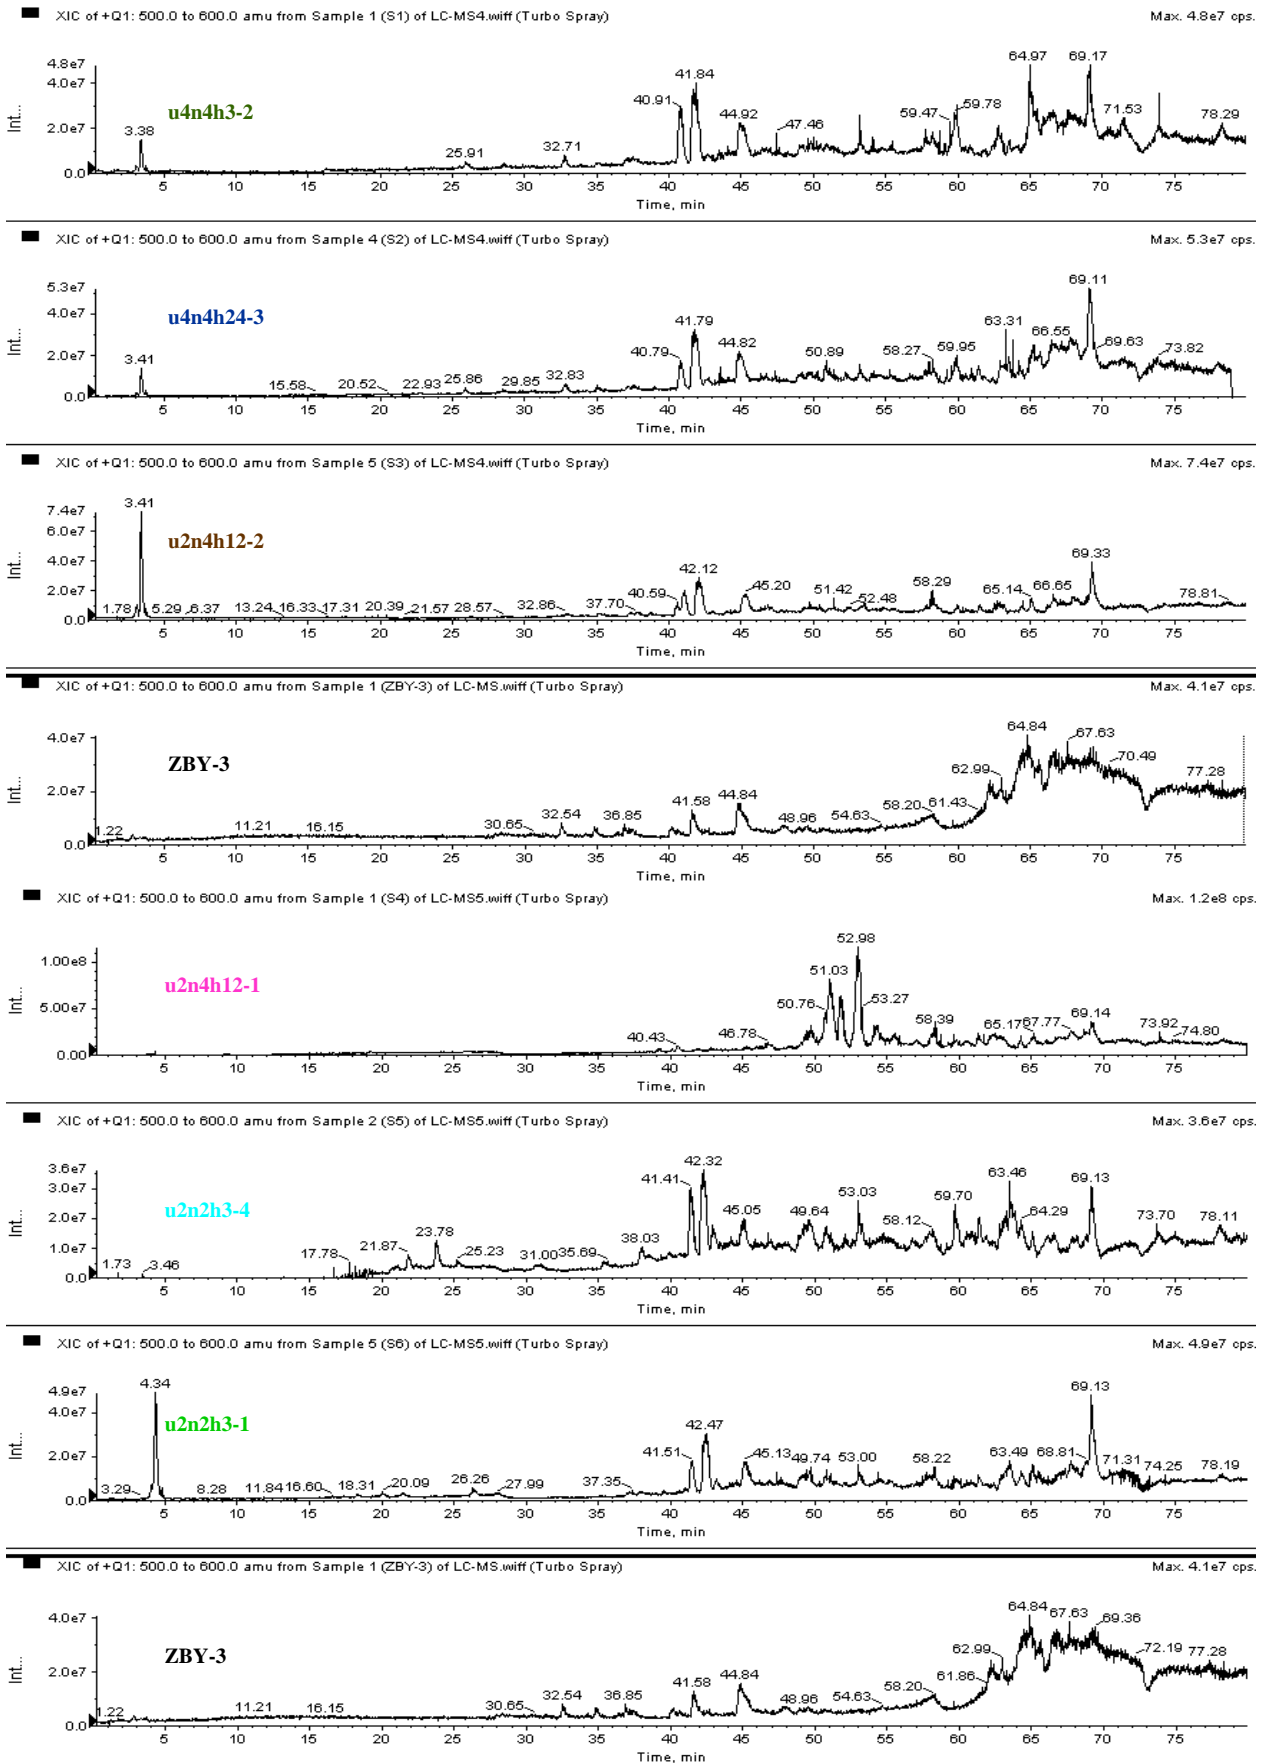

(C4)

Figure S2. Cont.

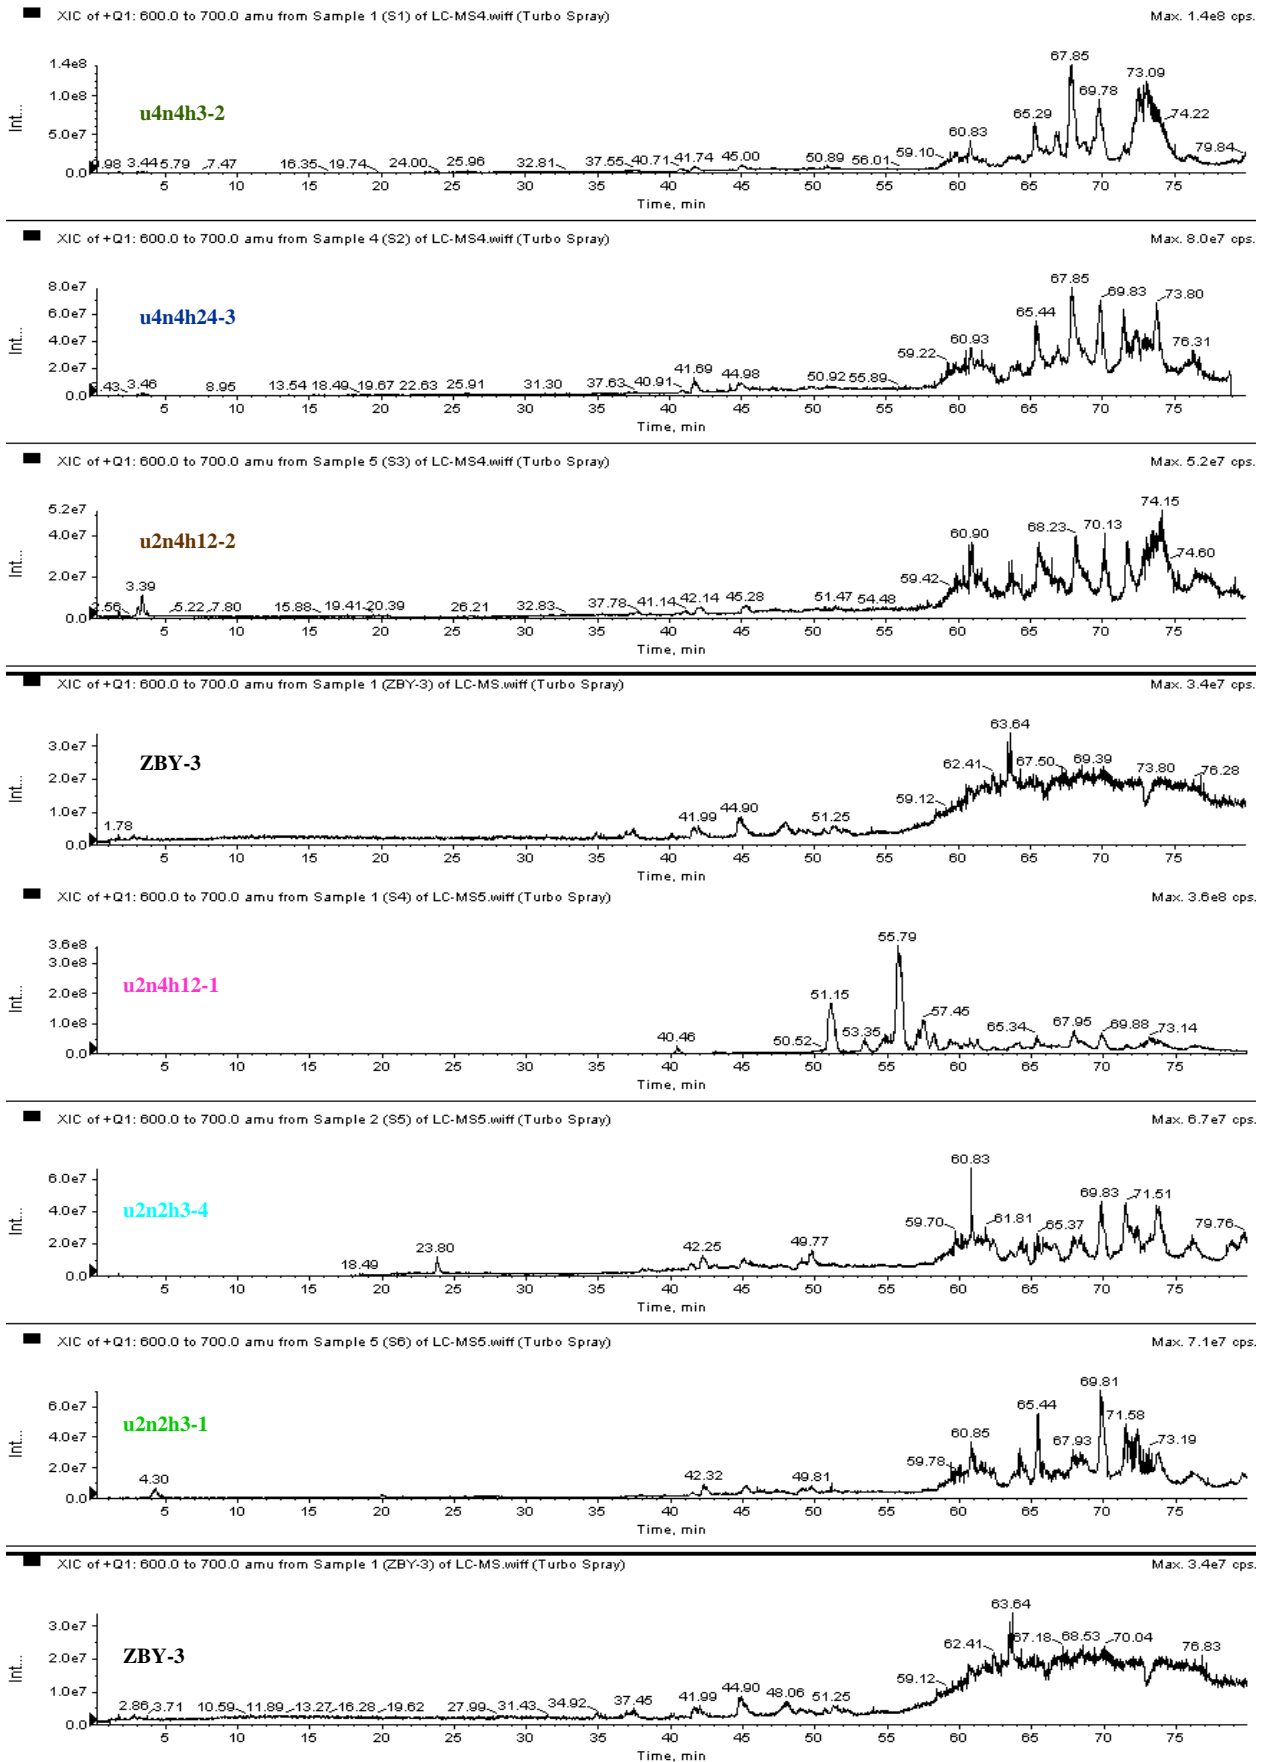

(C5)

Figure S2. Cont.

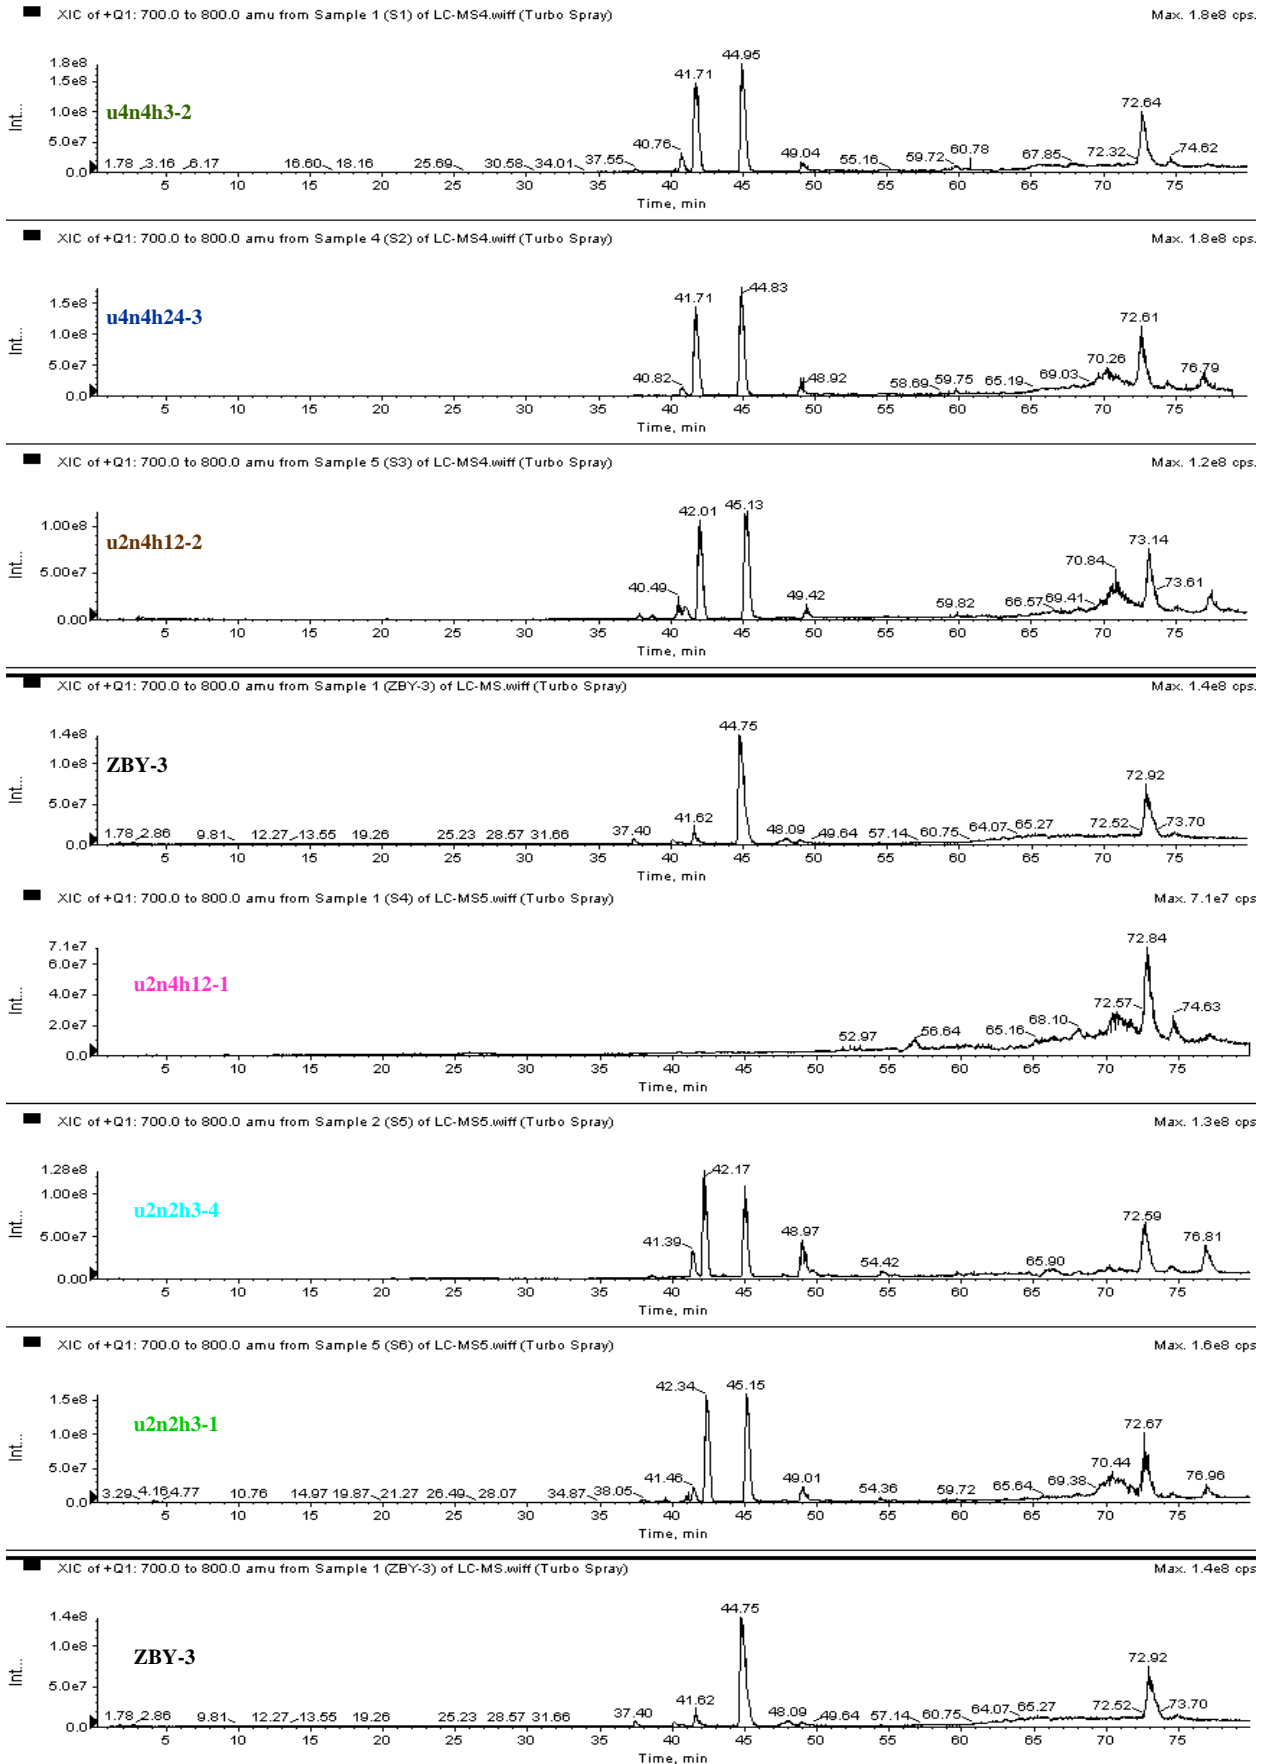

(C6)

Figure S2. Cont.

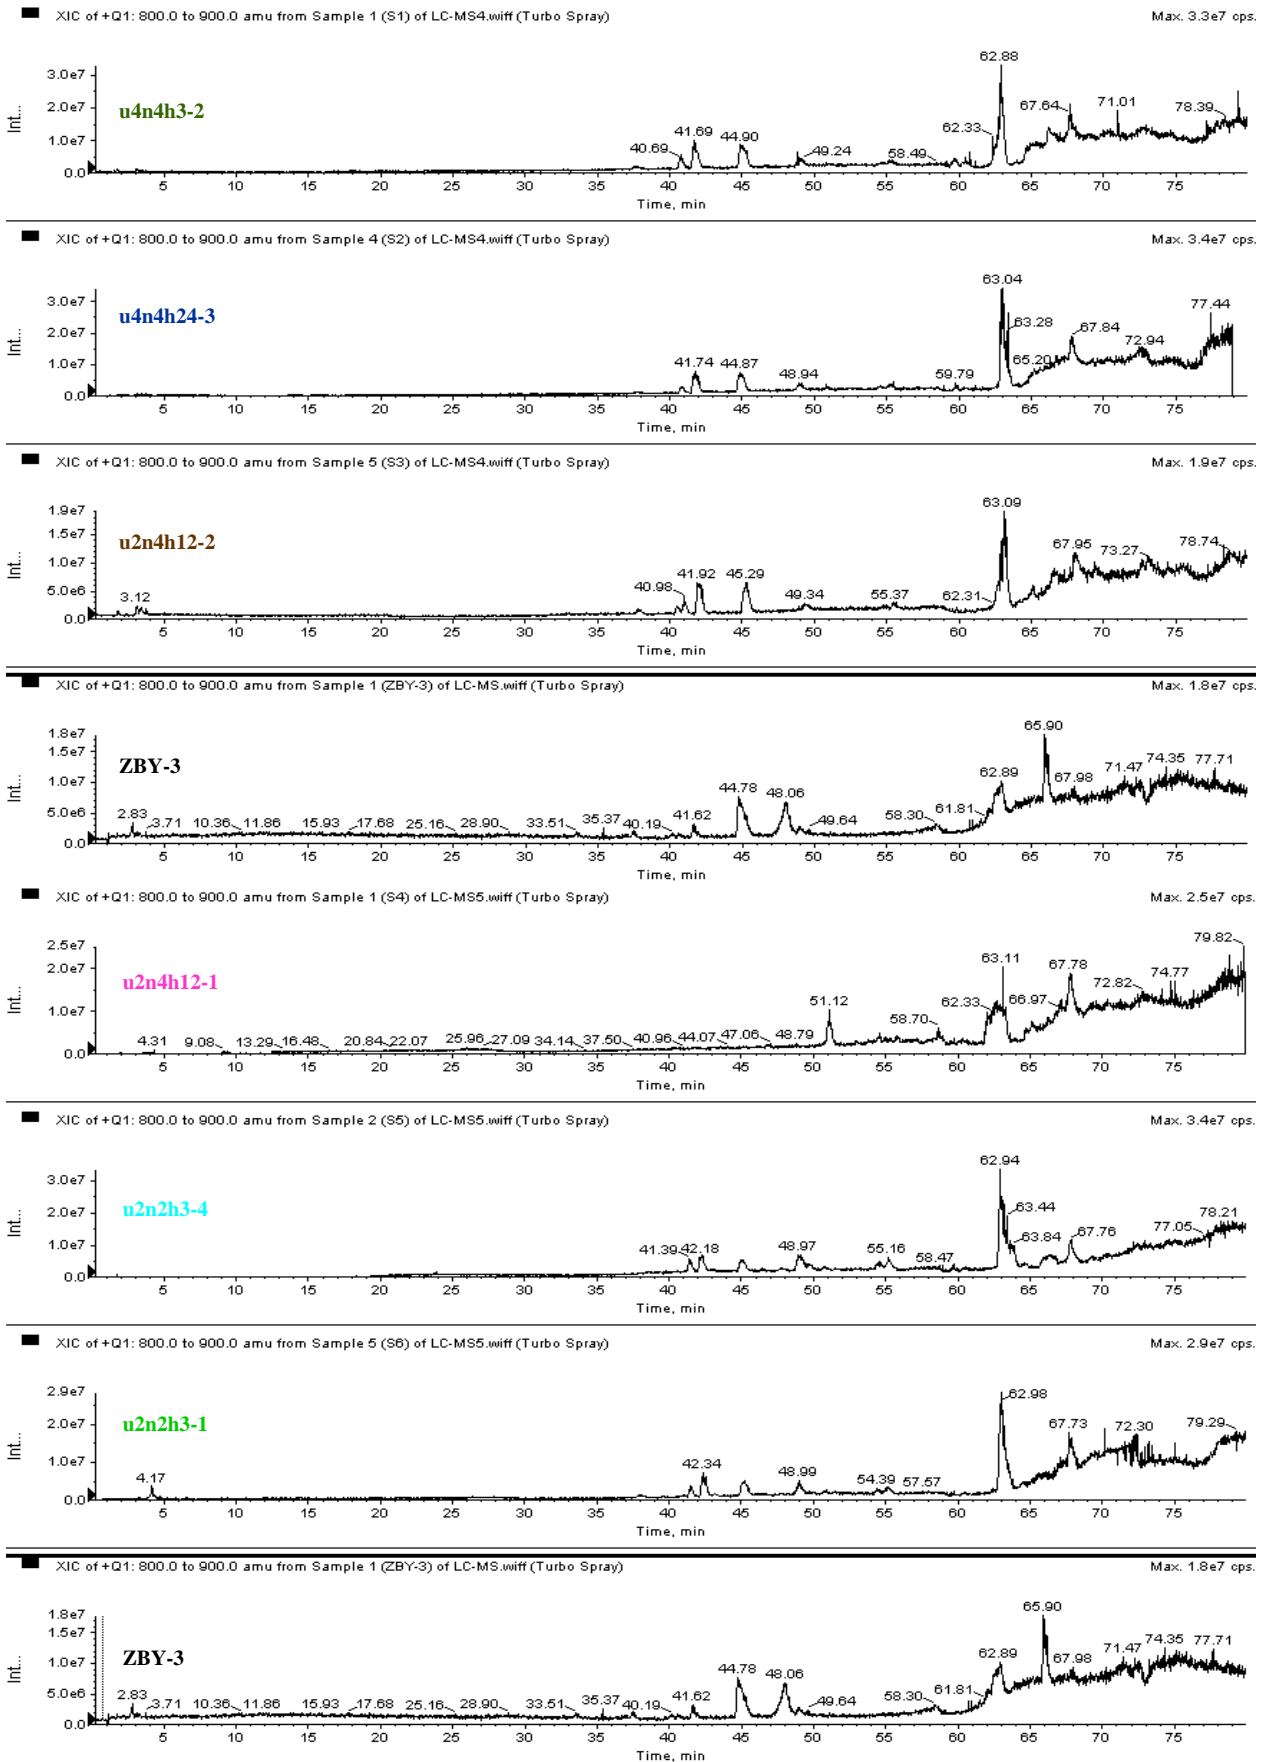

(C7)

Figure S2. Cont.

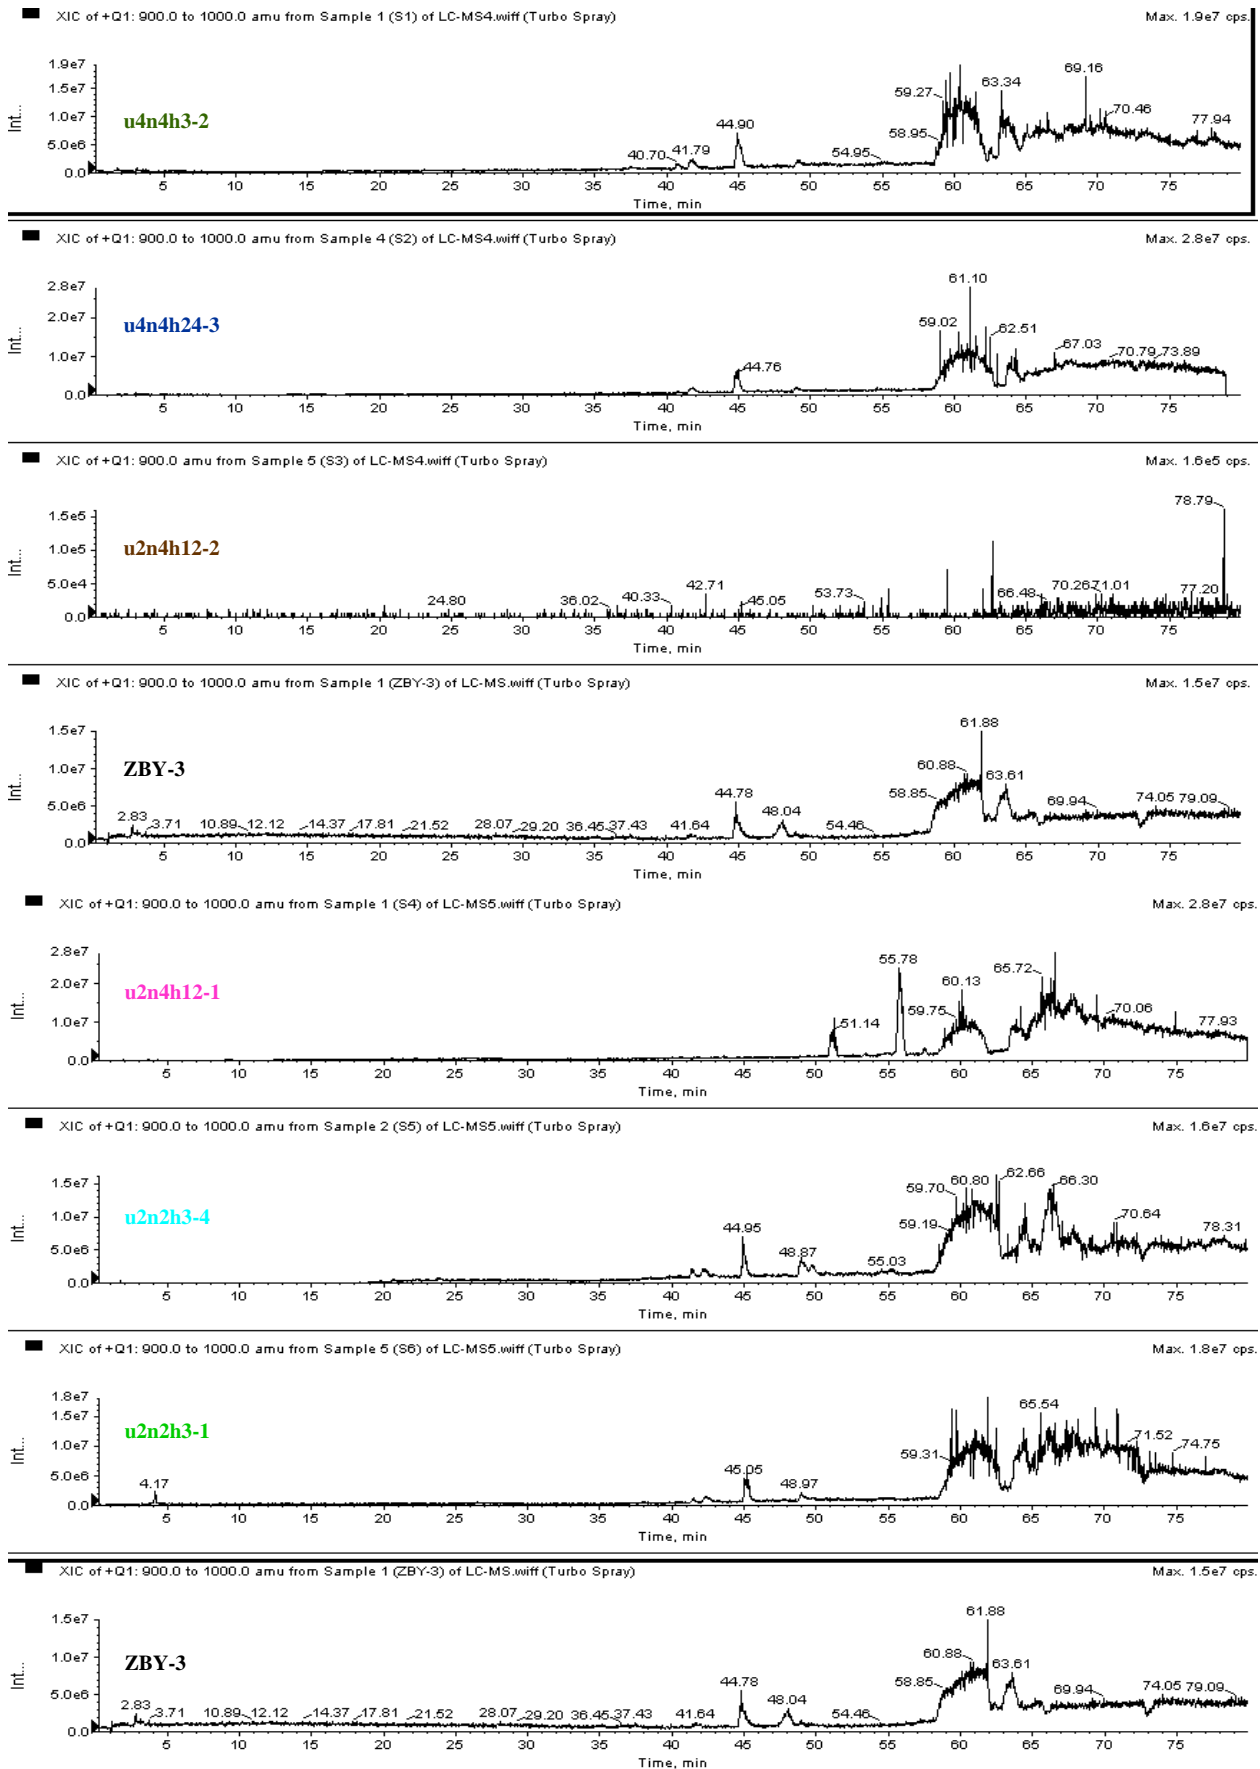

(C8)

Figure S2. Cont.

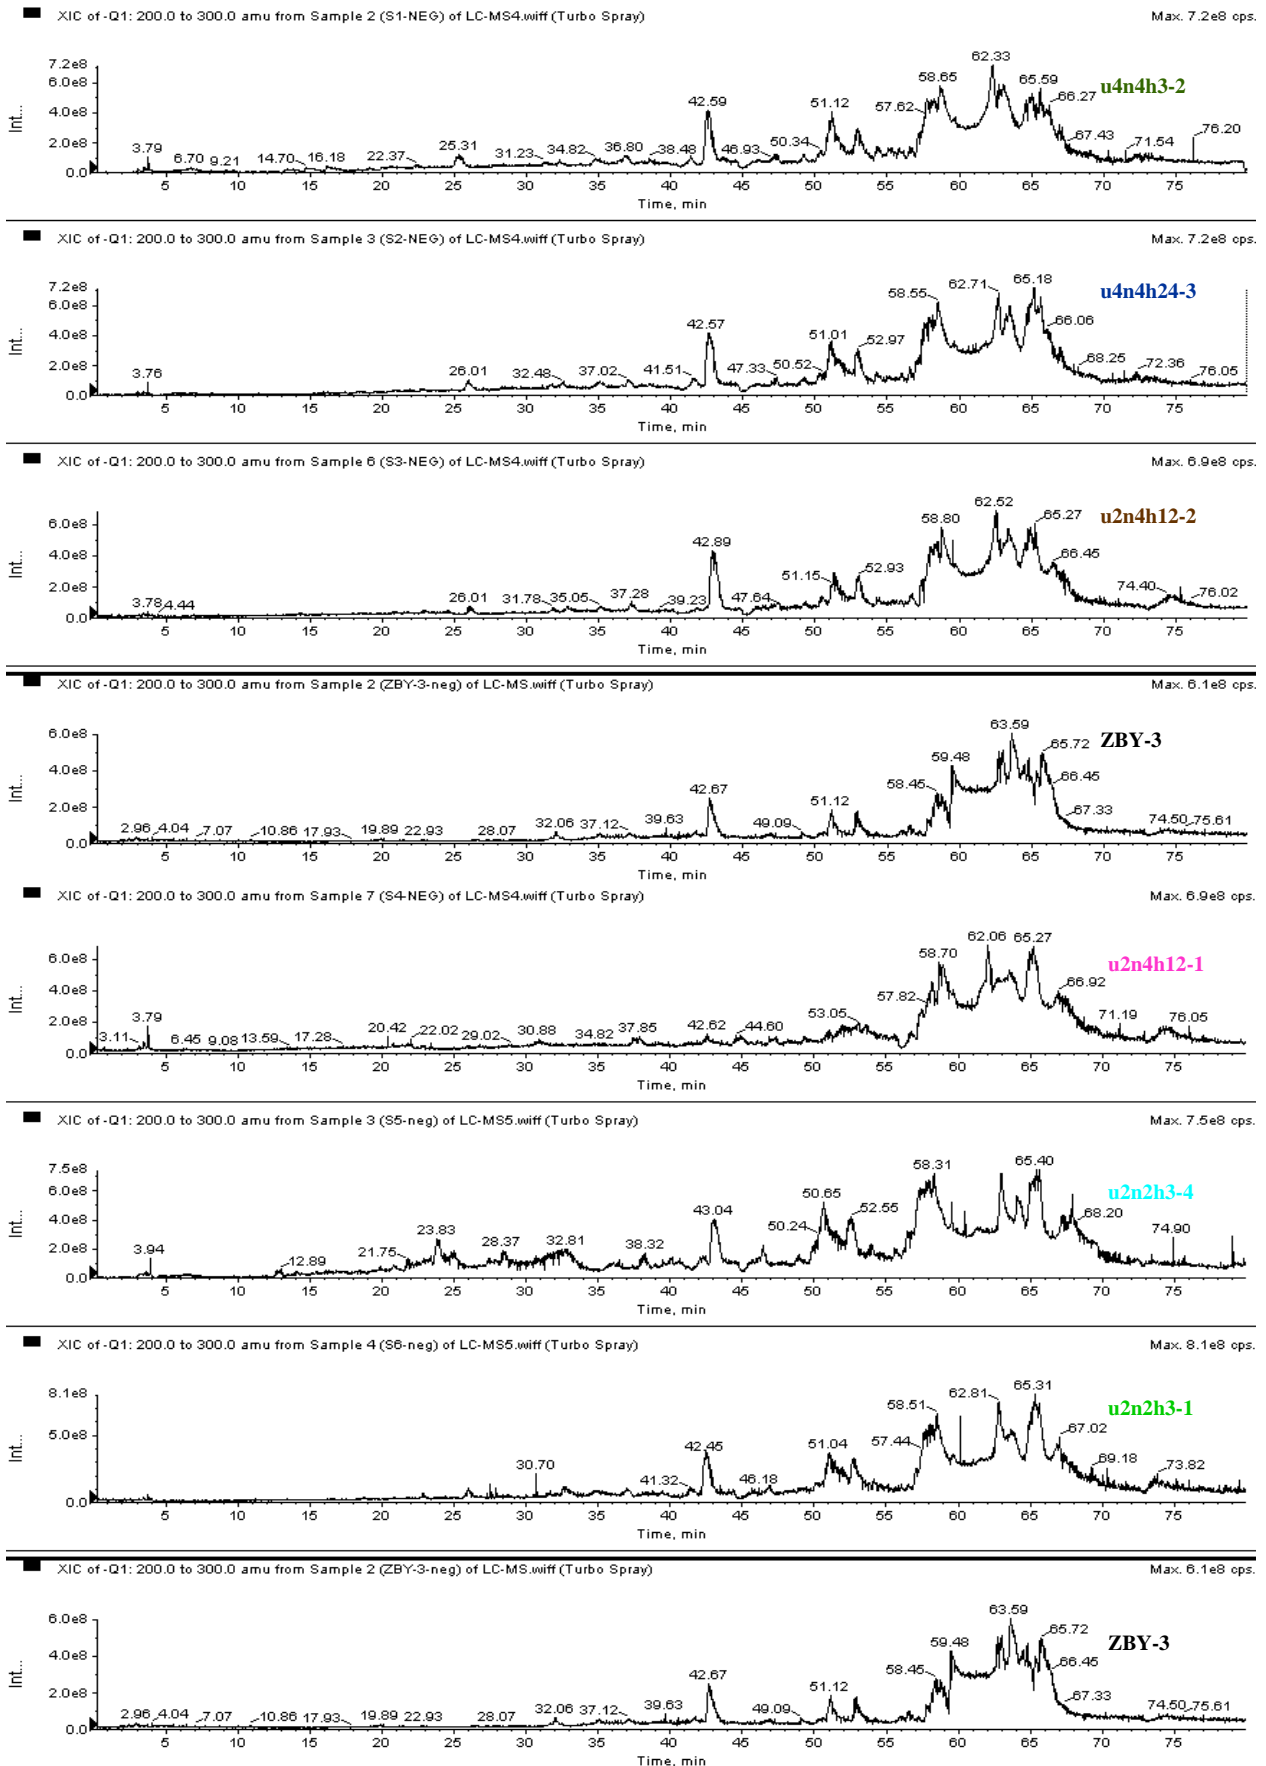

(D1)



Figure S2. Cont.

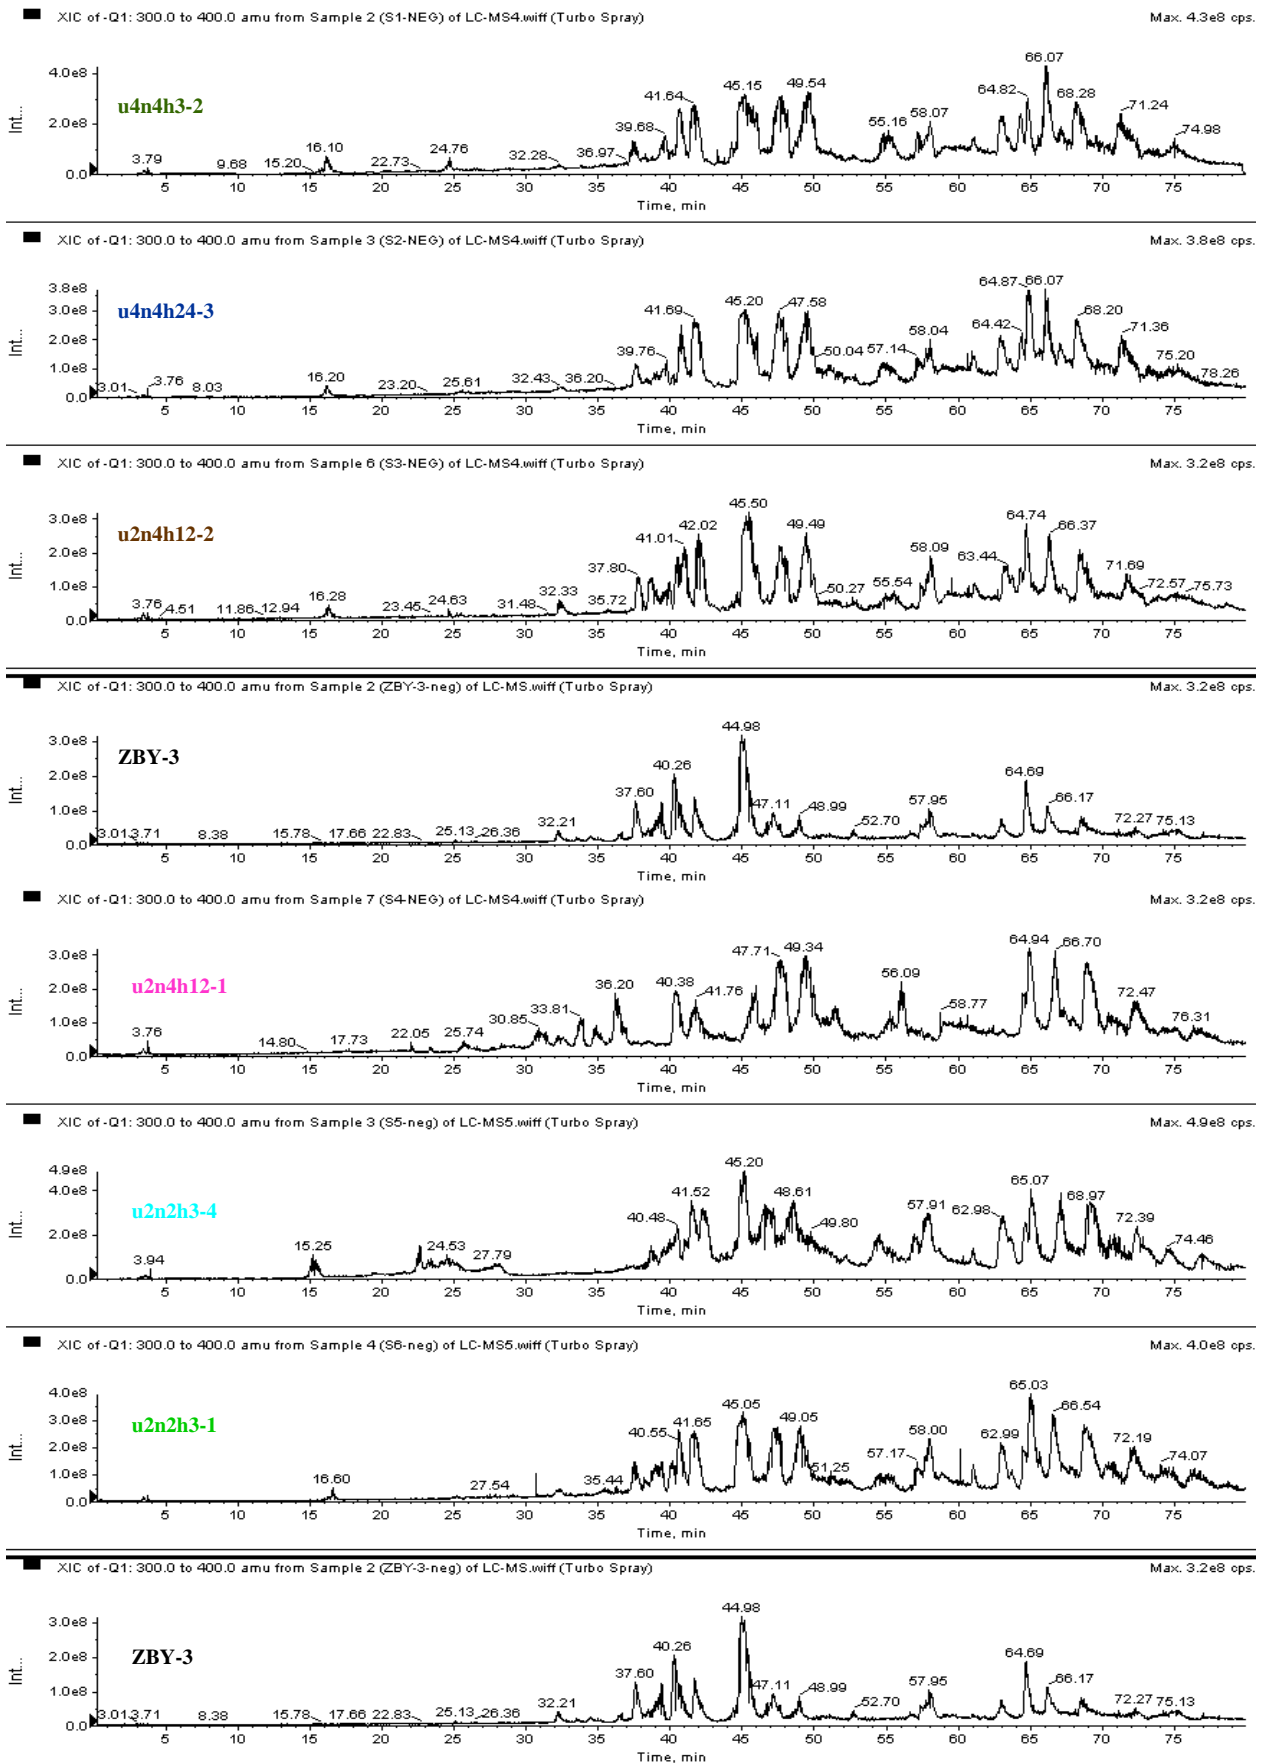

(D2)

Figure S2. Cont.

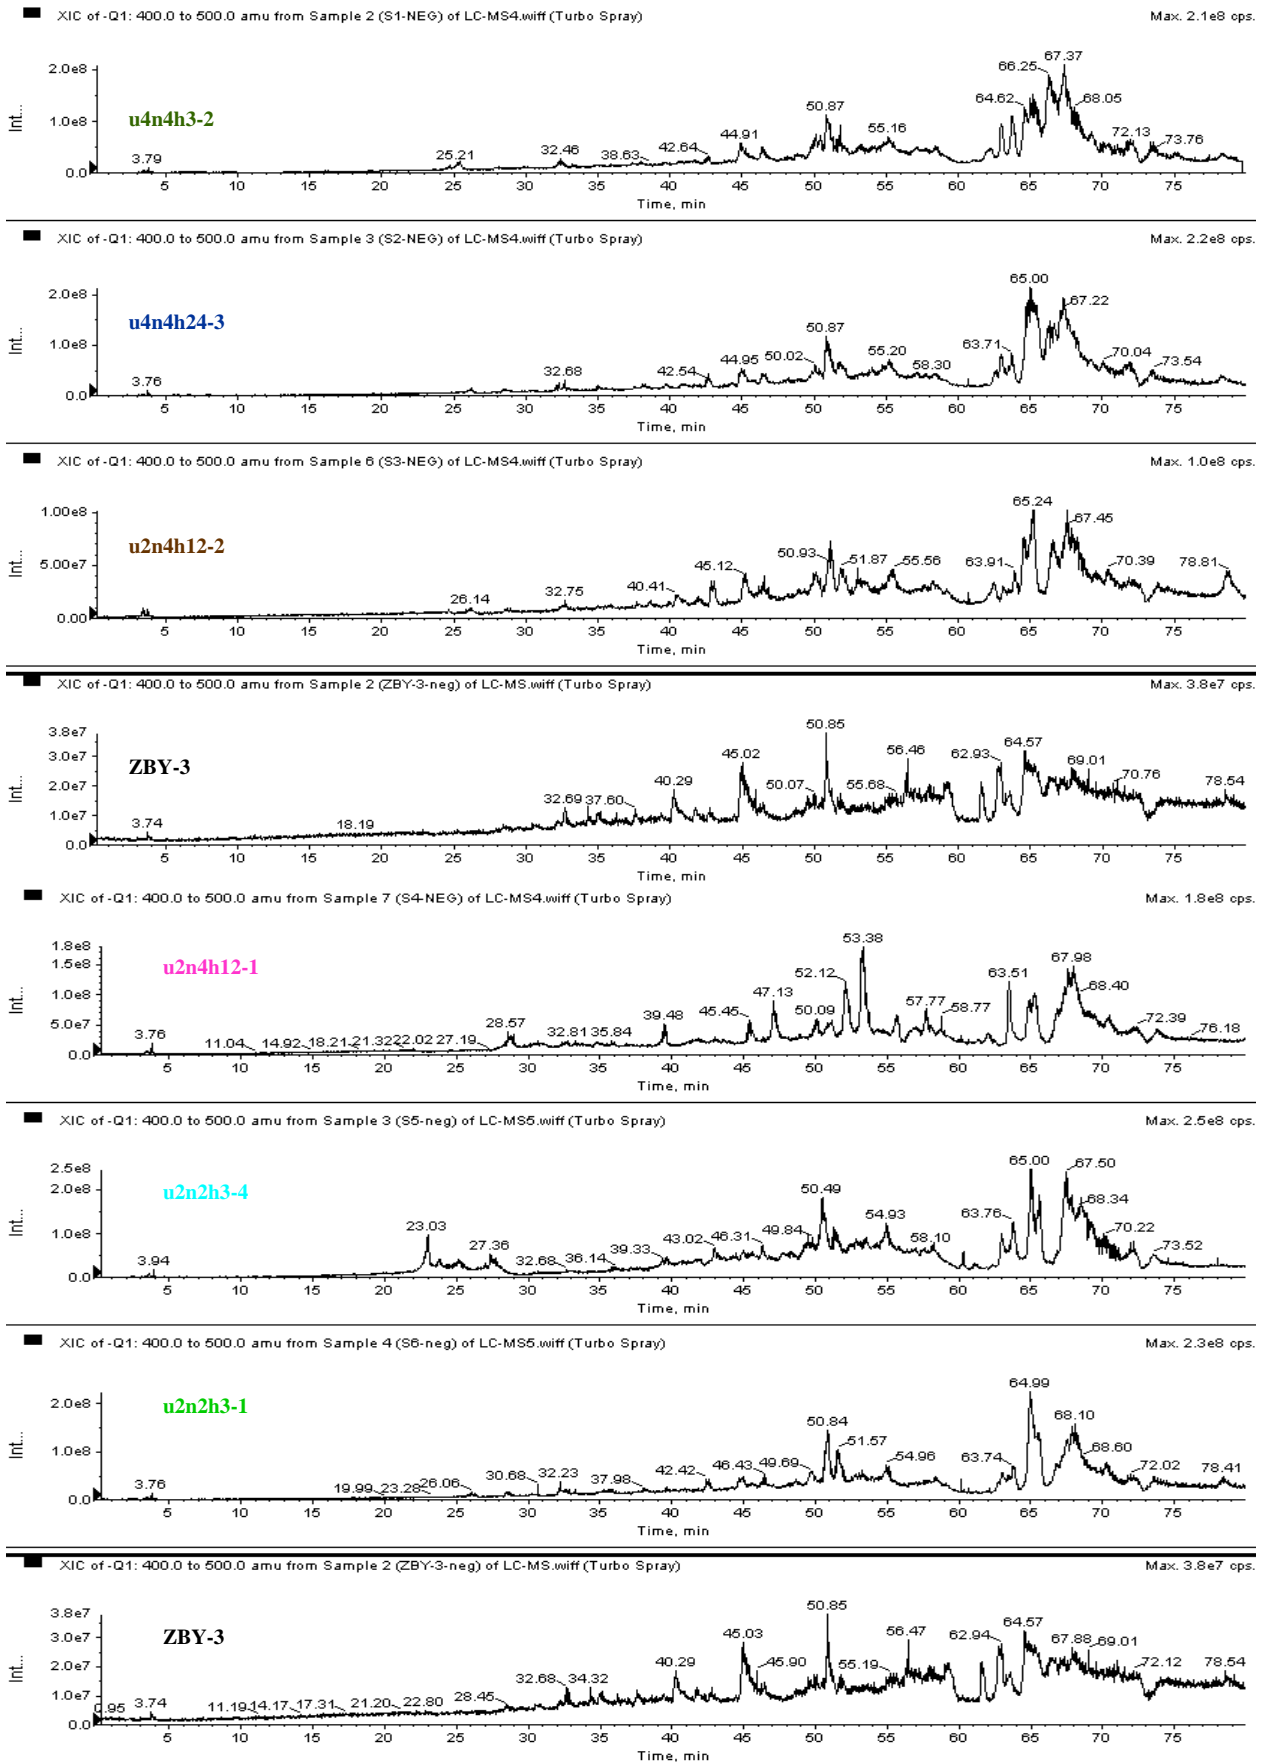

(D3)

Figure S2. Cont.

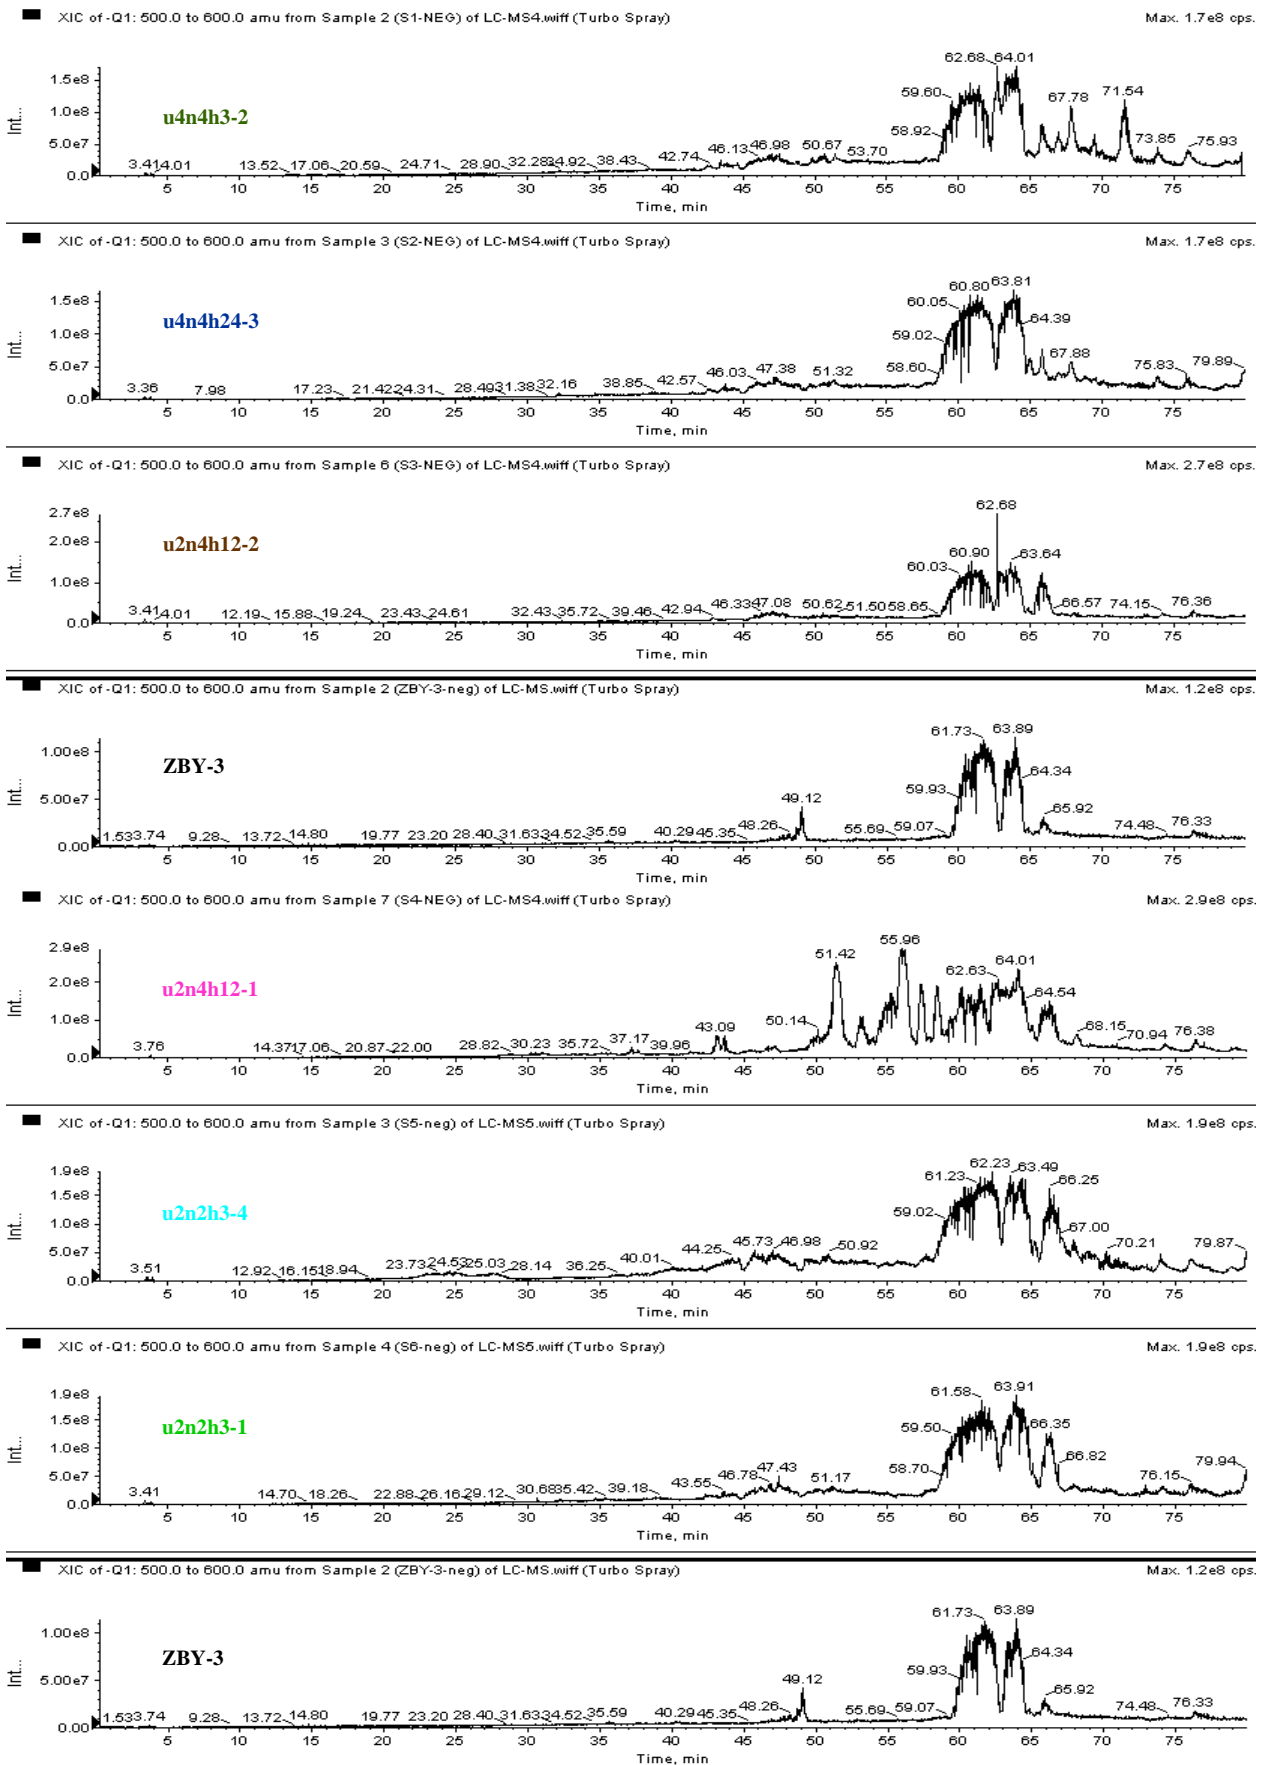

Figure S2. Cont.

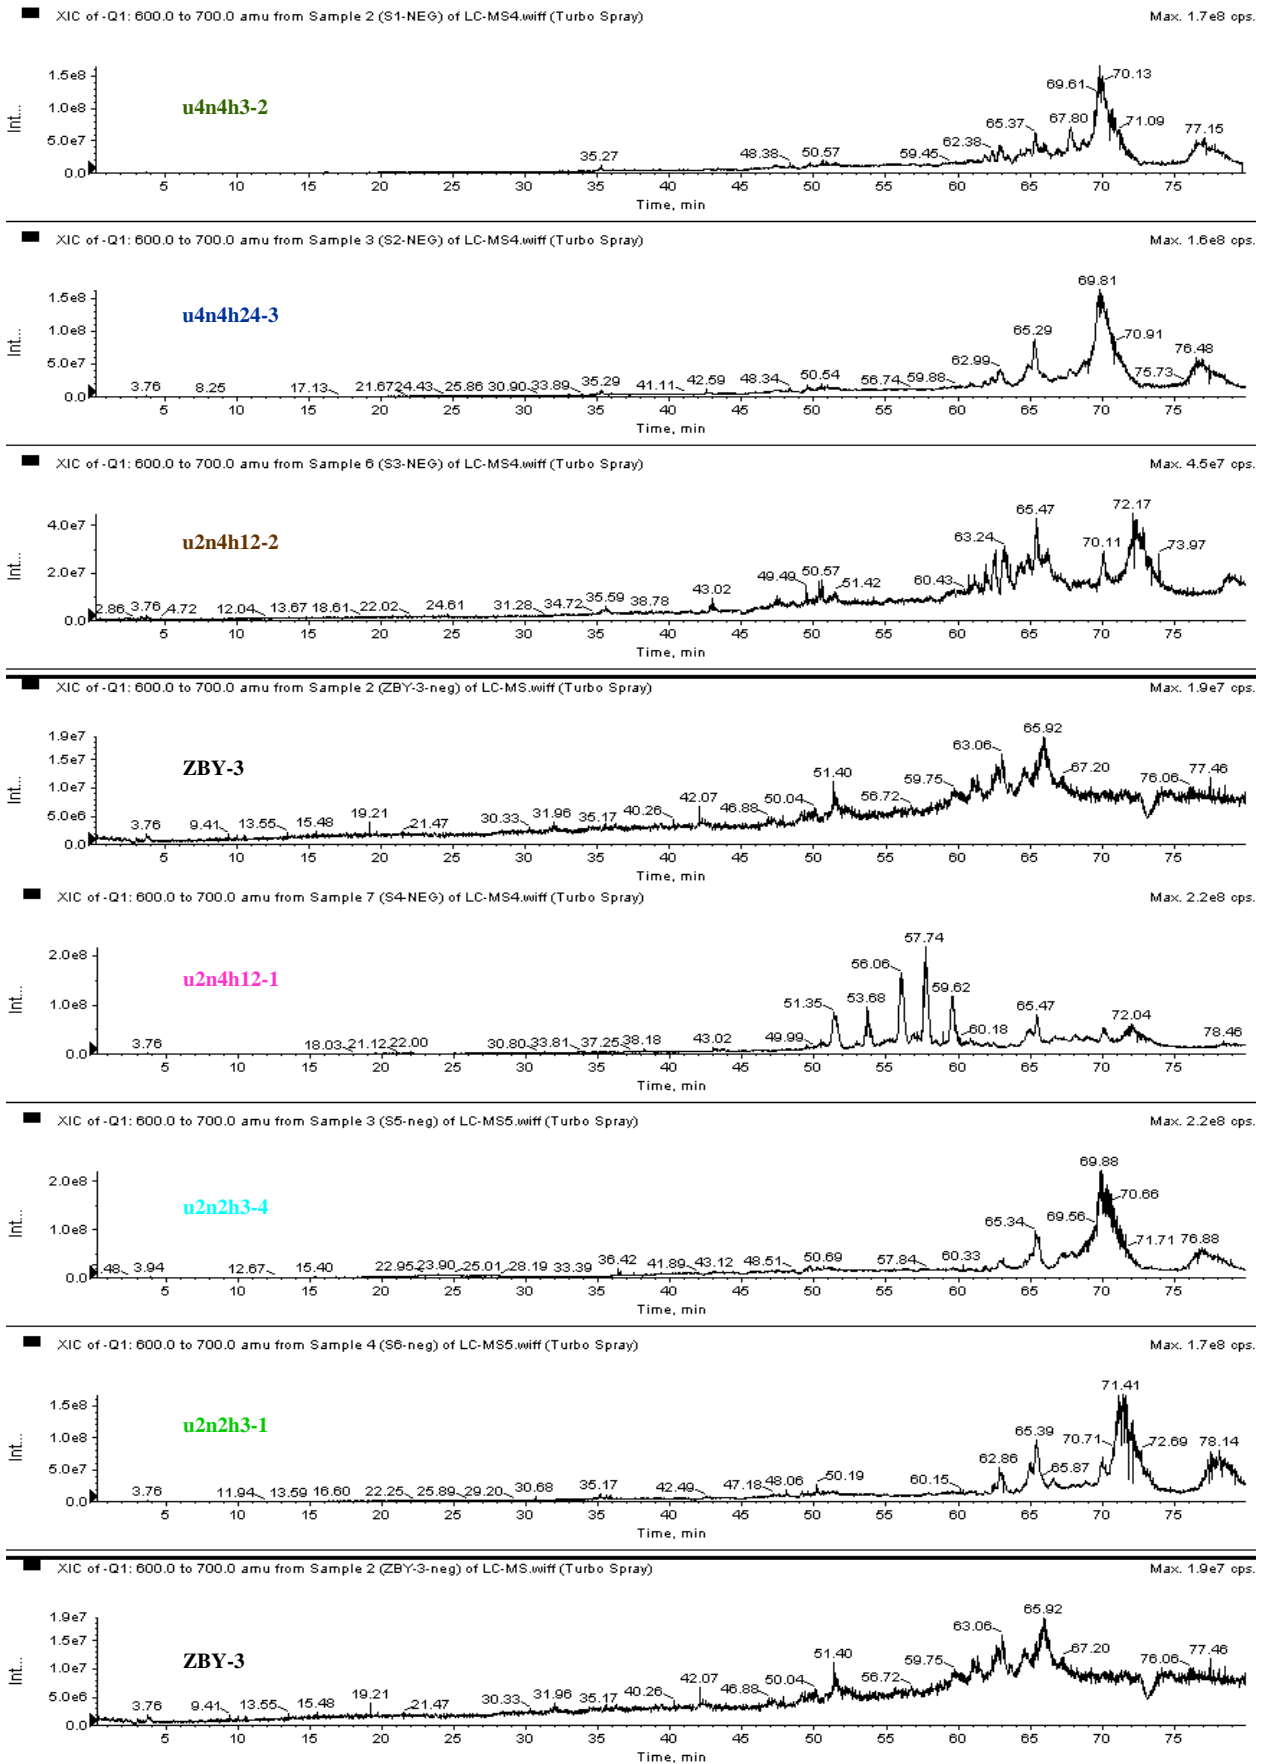

Figure S2. Cont.

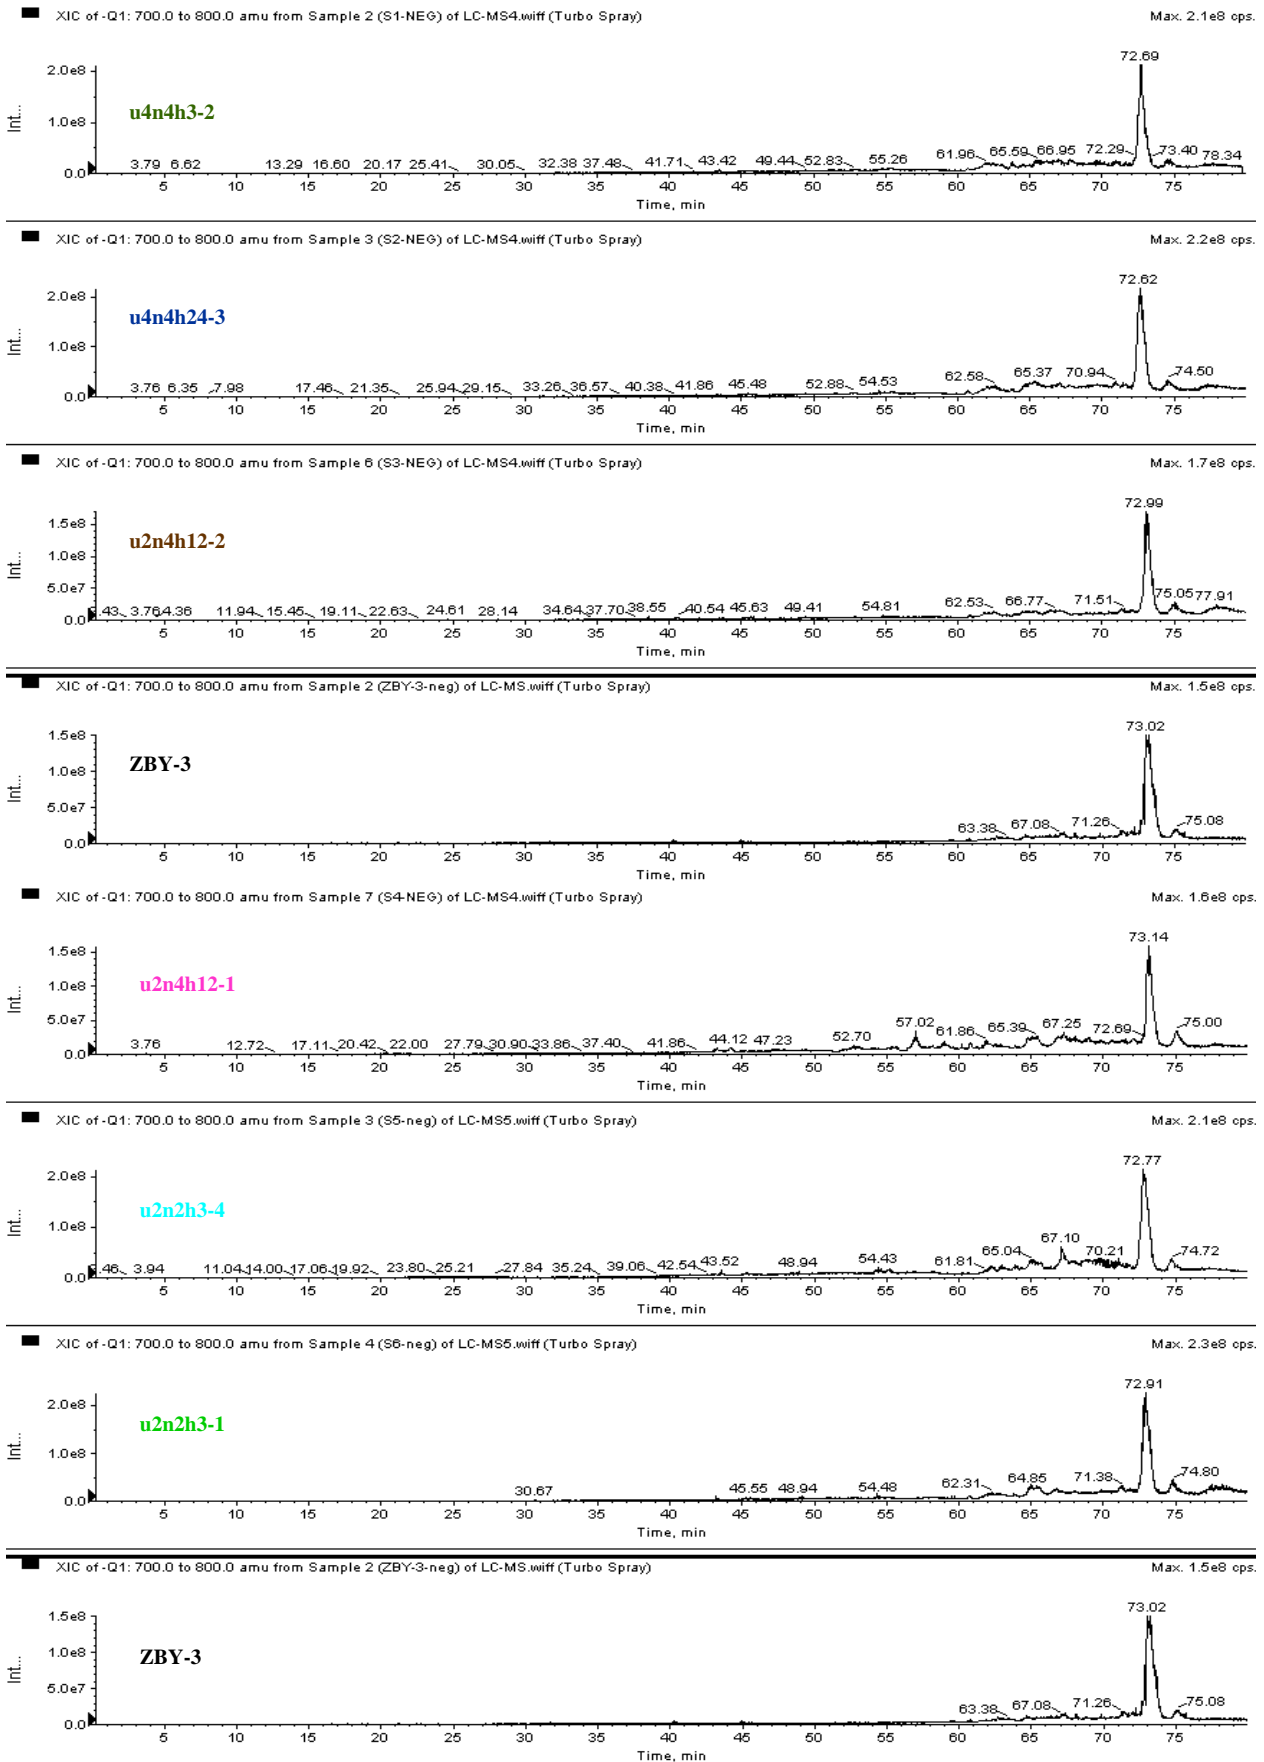

Figure S2. Cont.

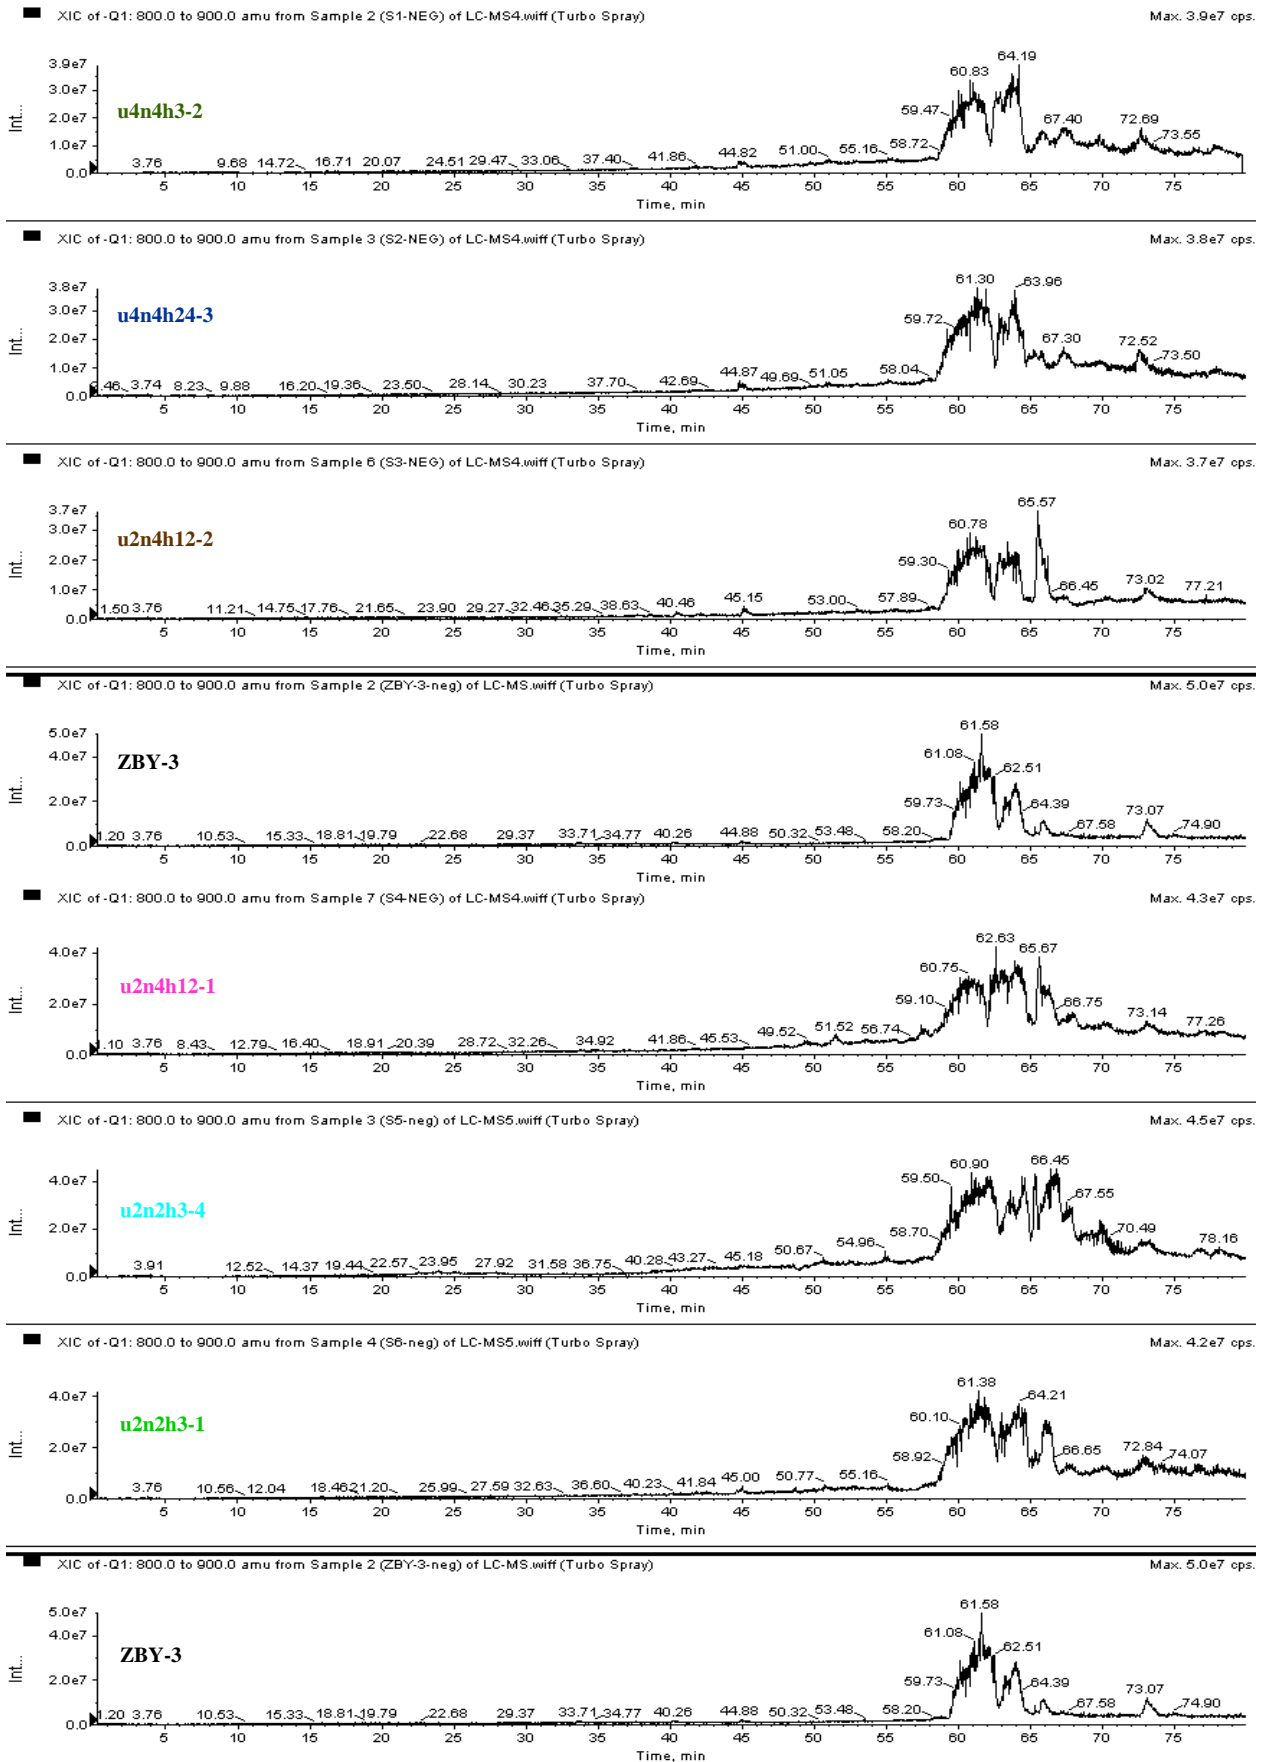

Figure S2. Cont.

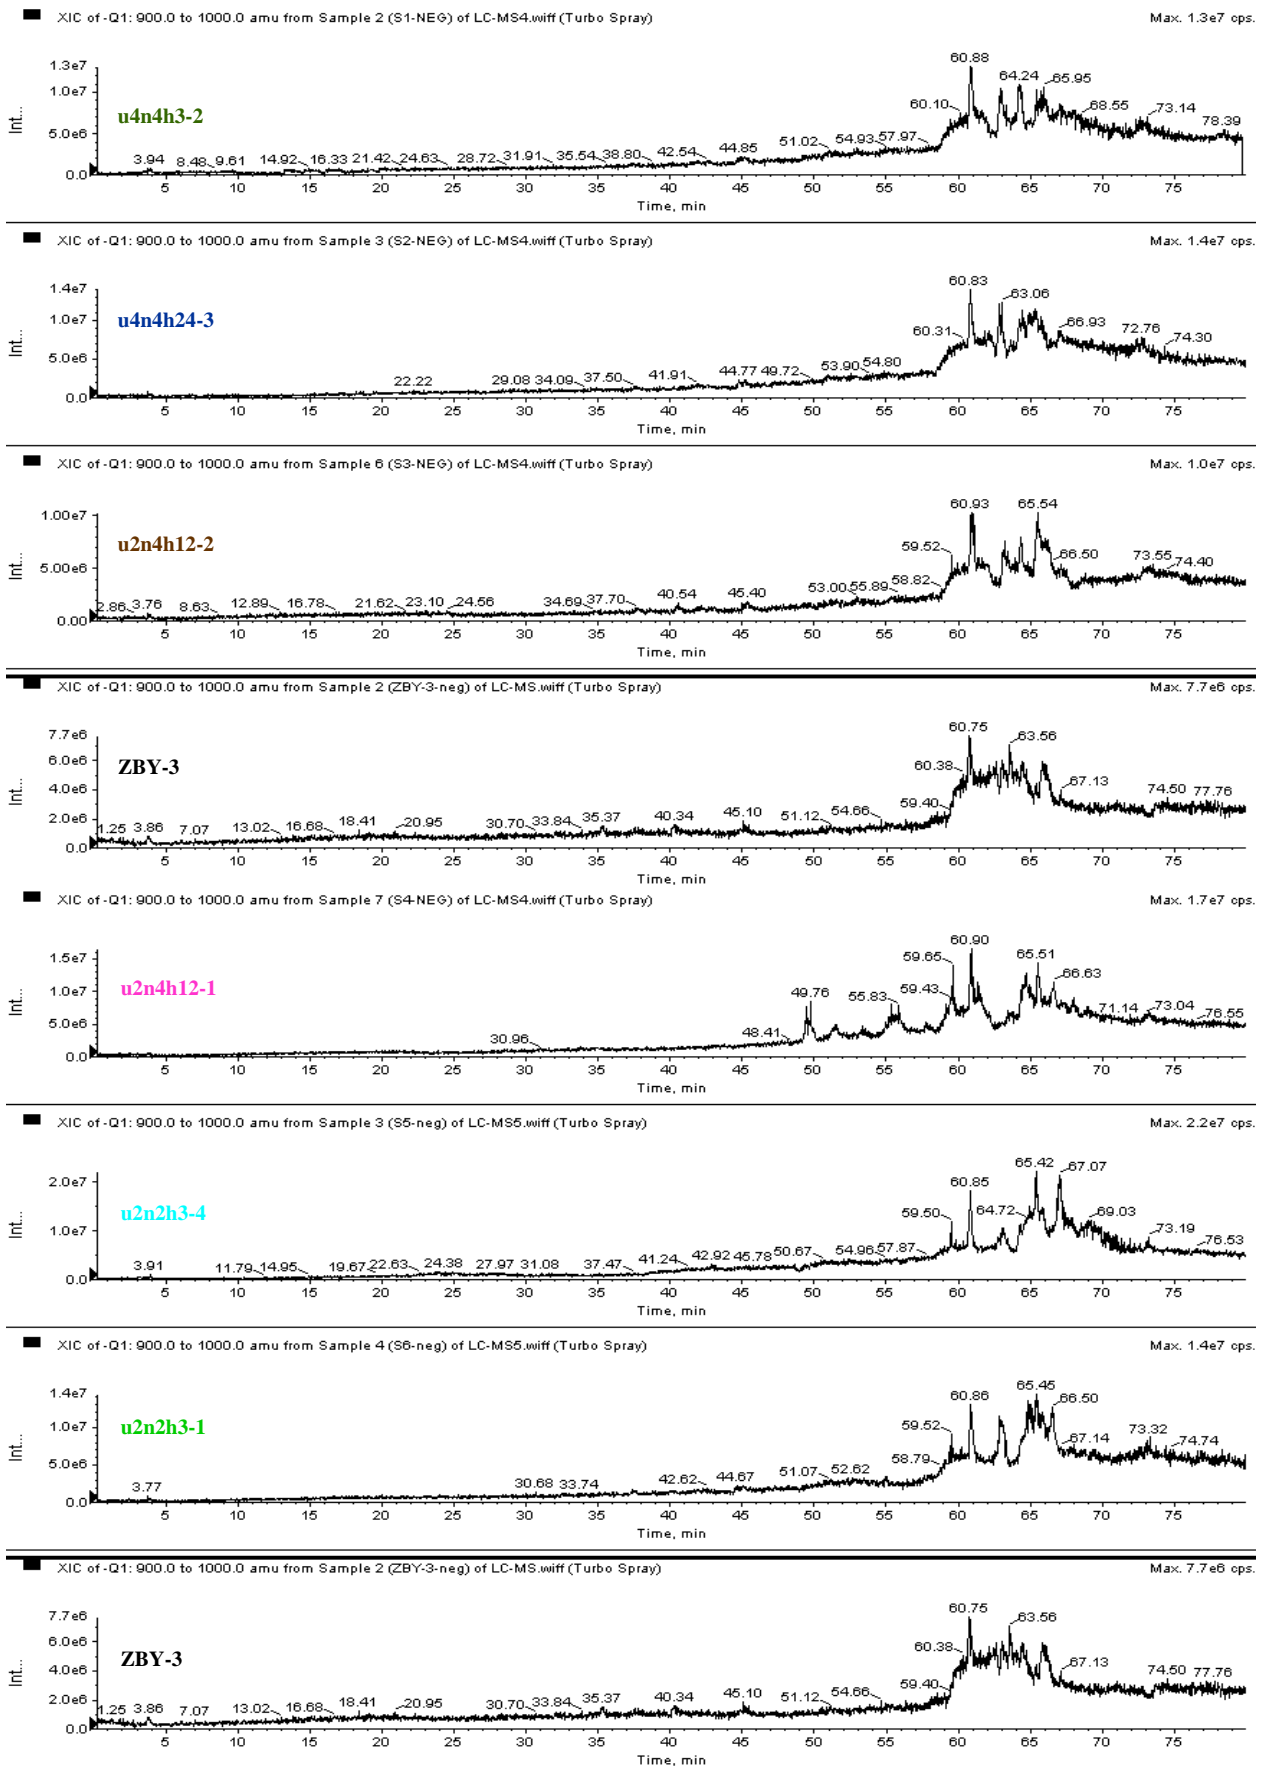

Figure S2. Cont.

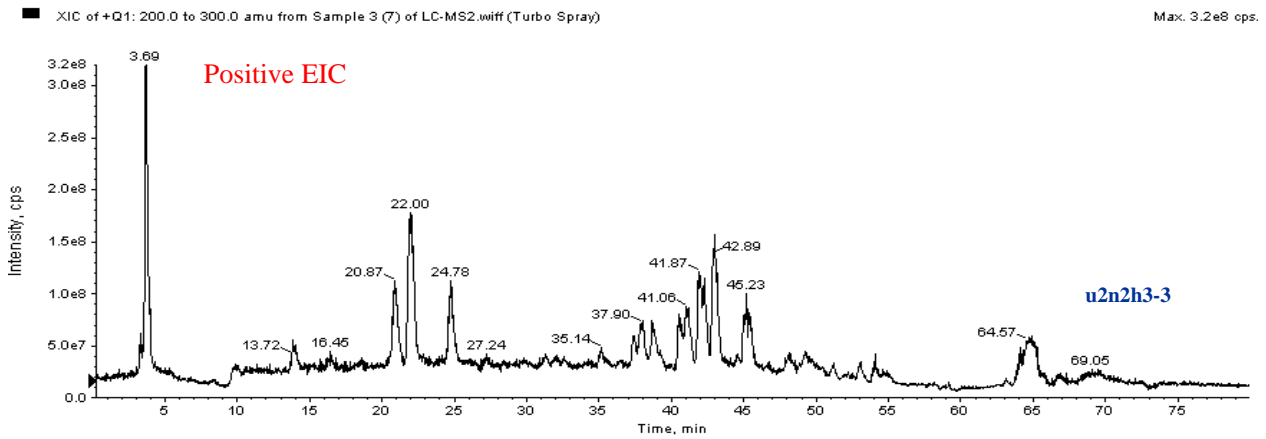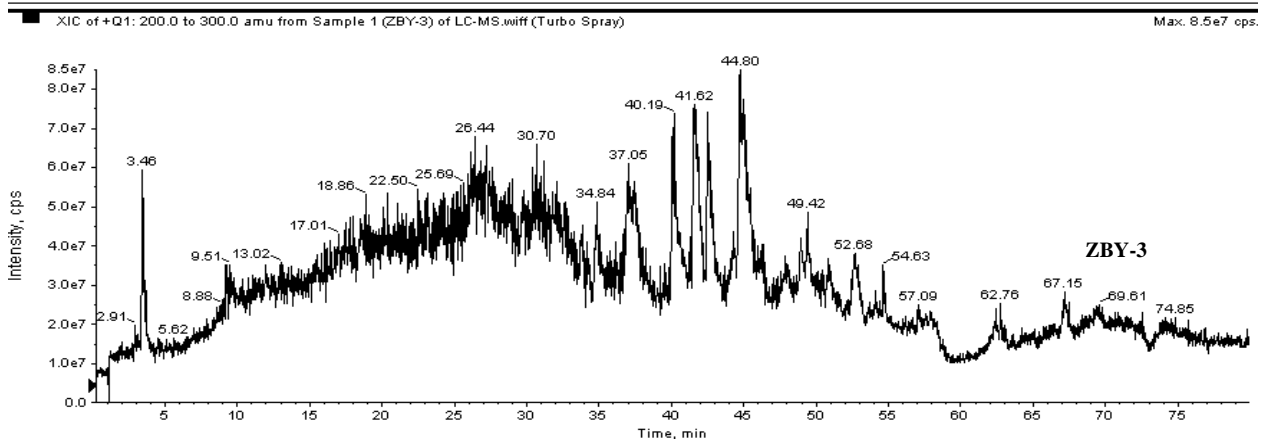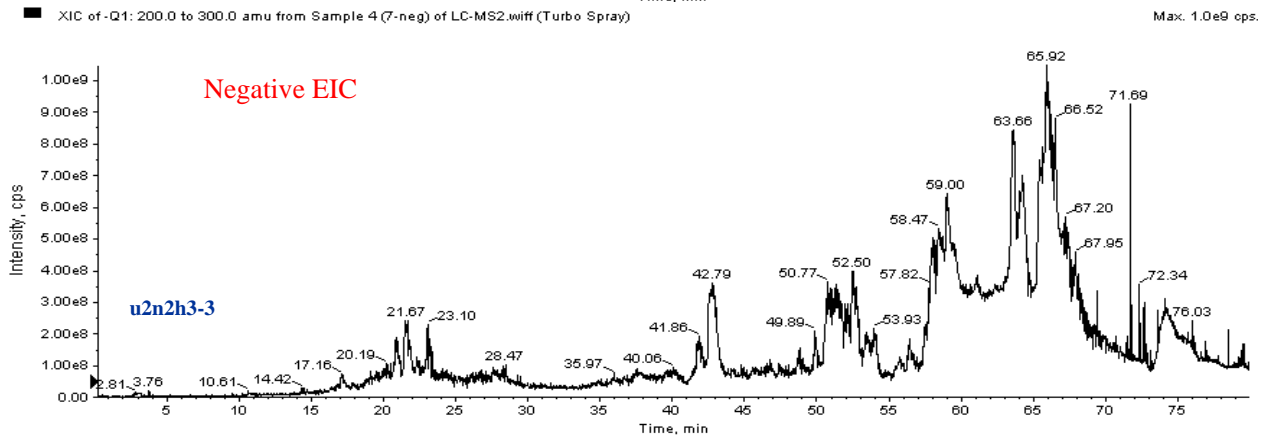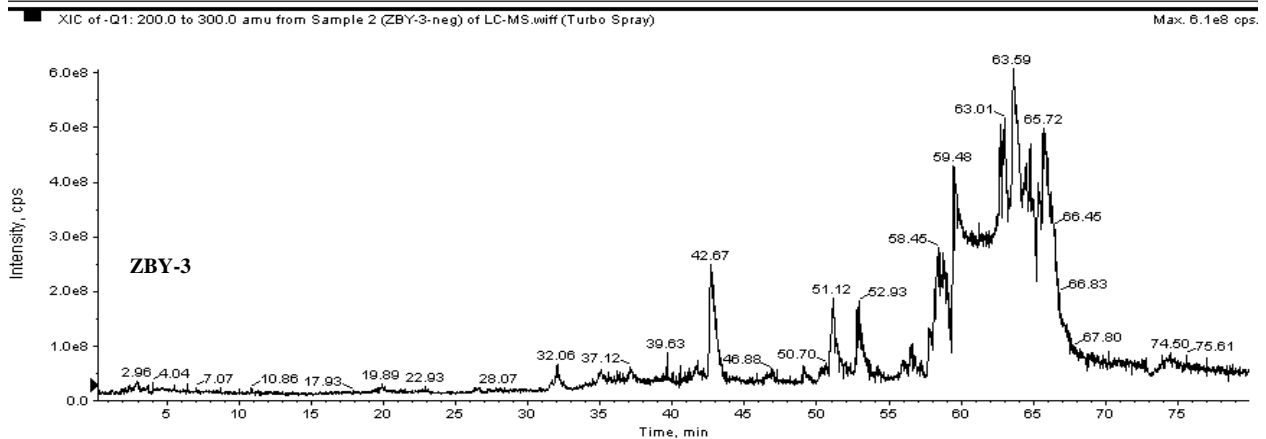

(E1)



Figure S2. Cont.

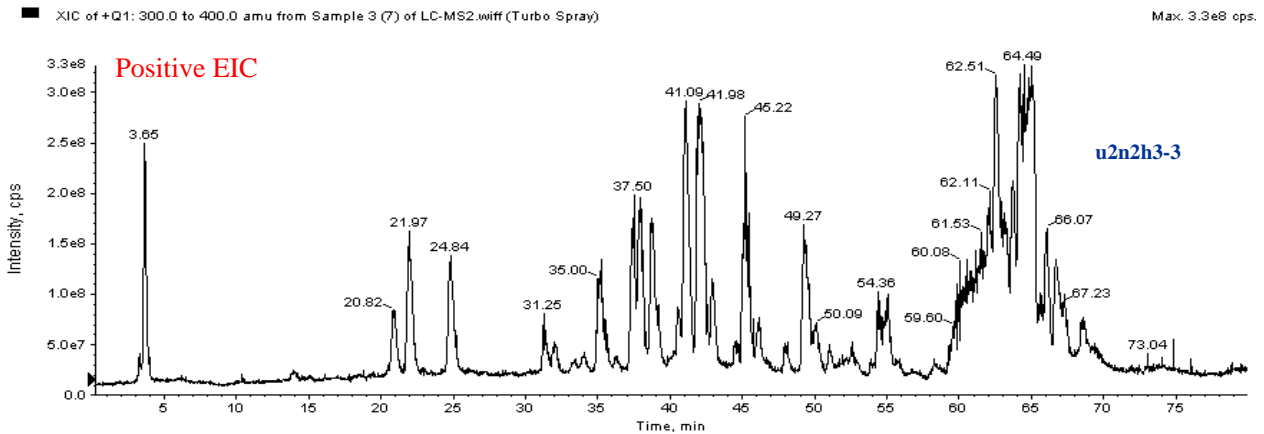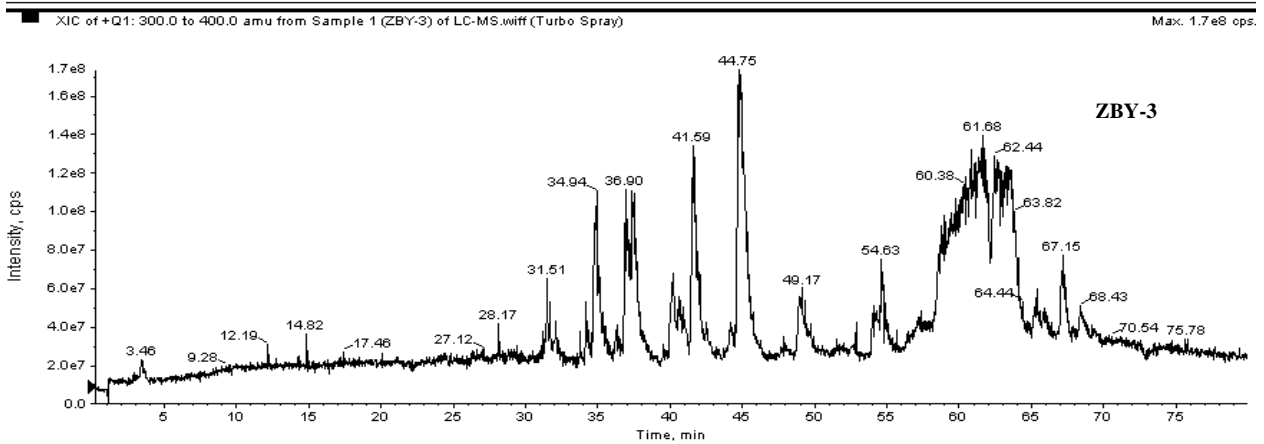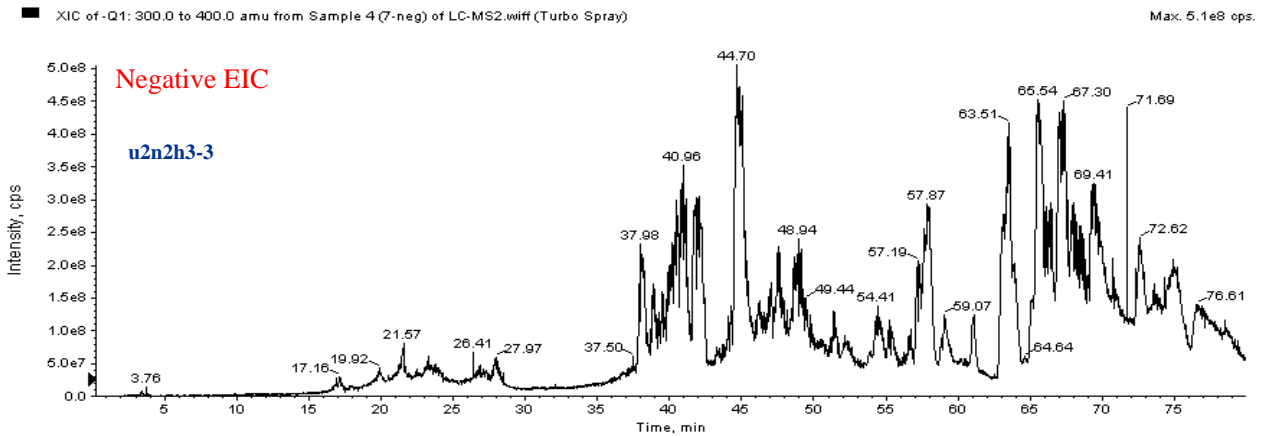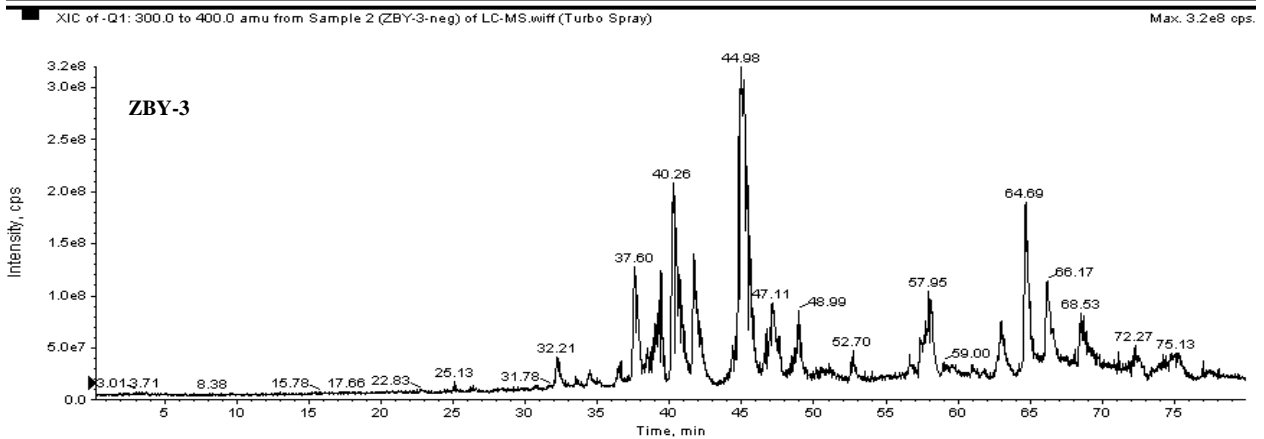

(E2)

Figure S2. Cont.

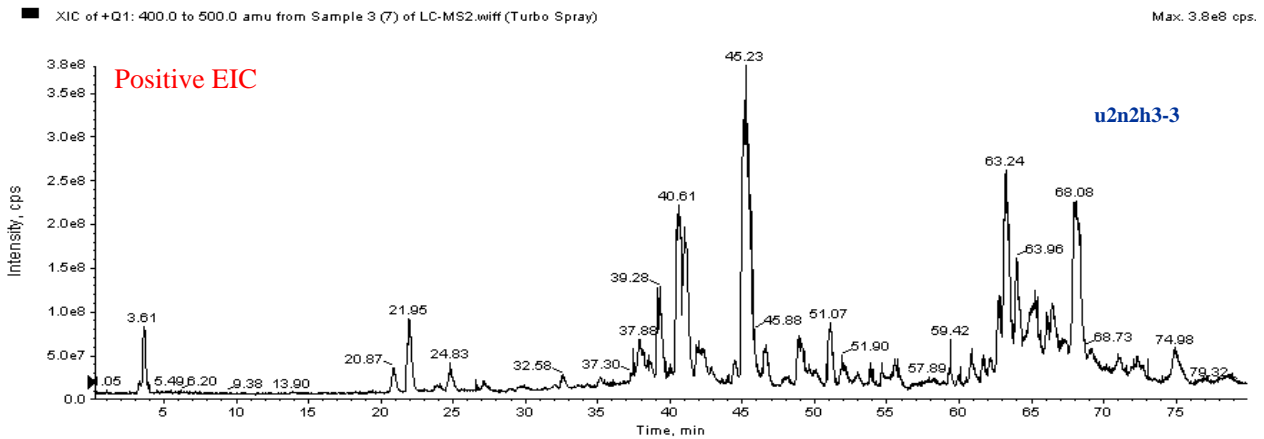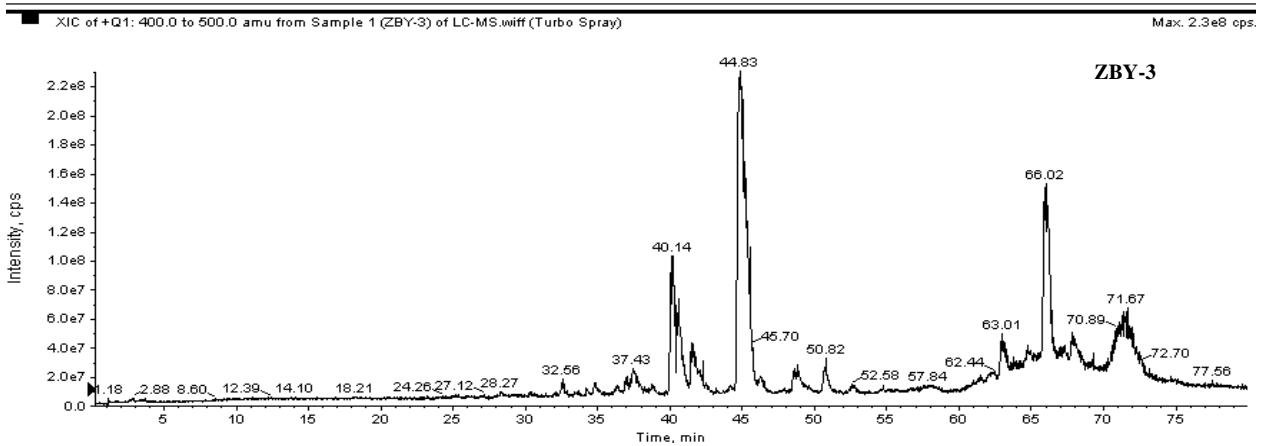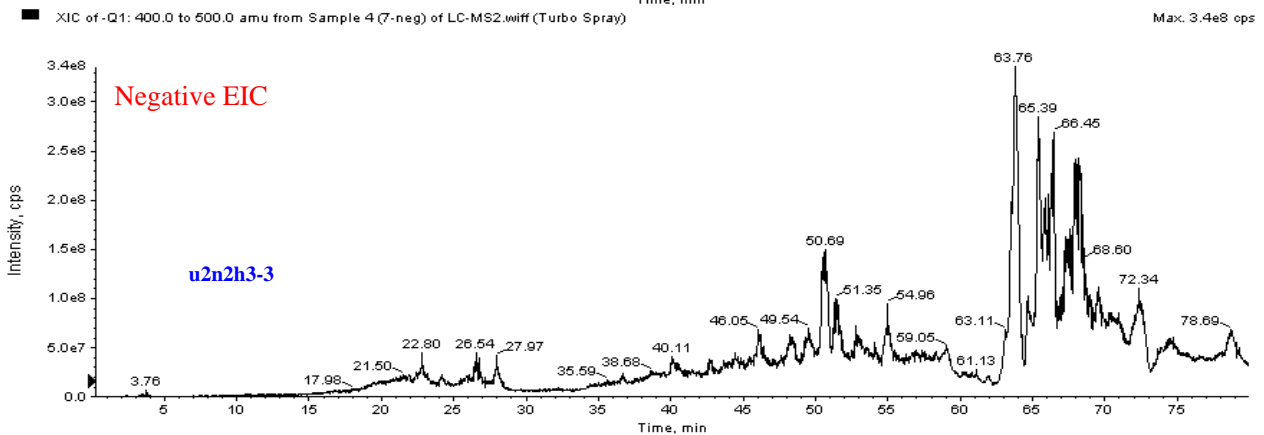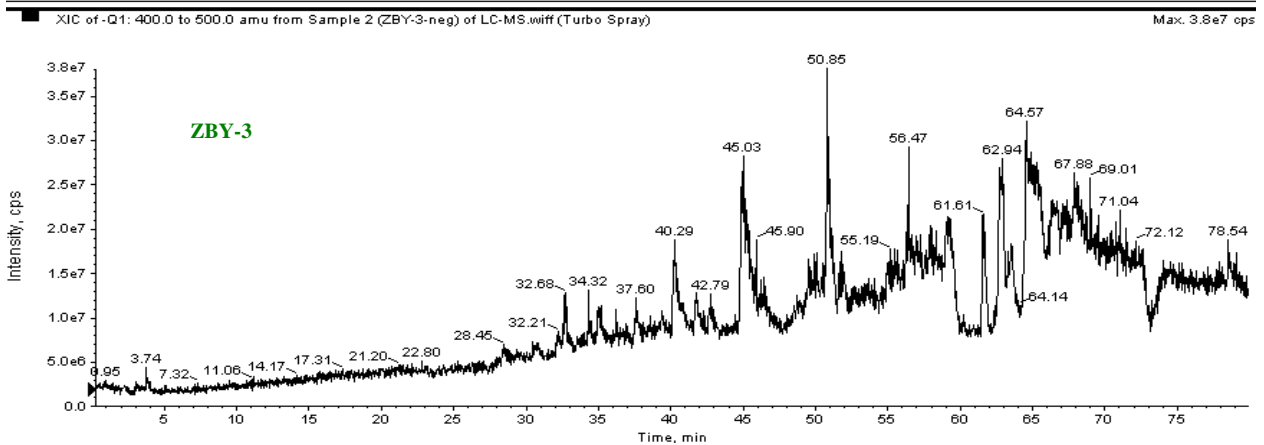

Figure S2. Cont.

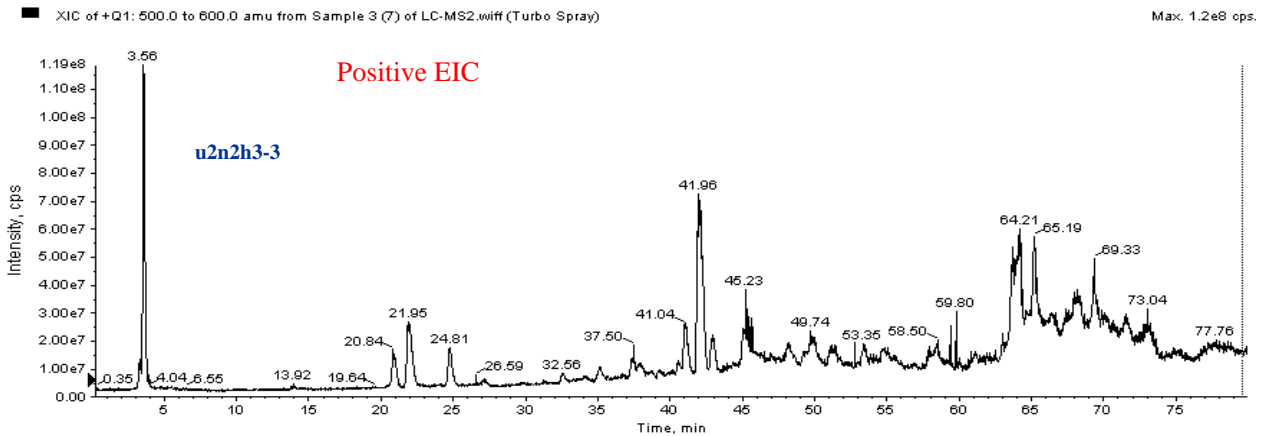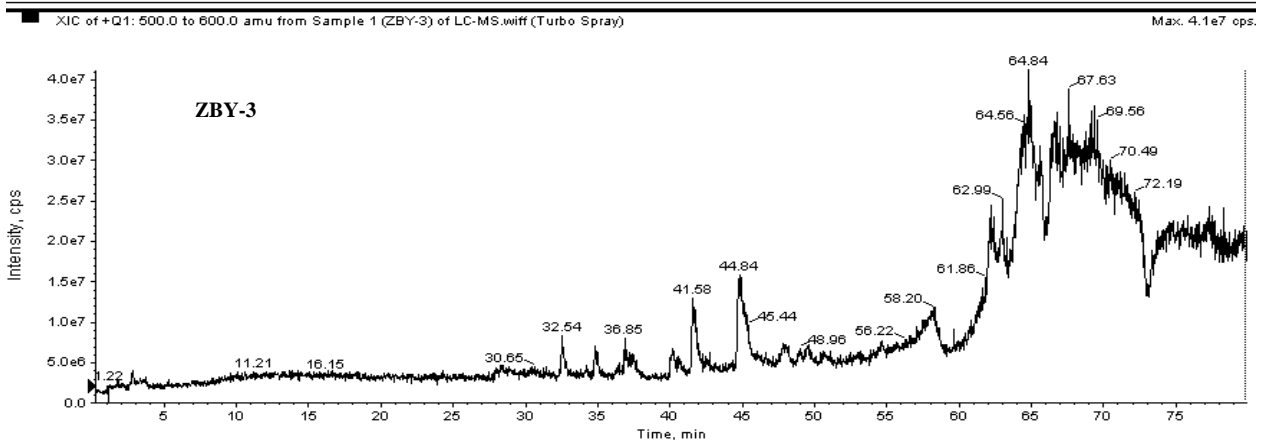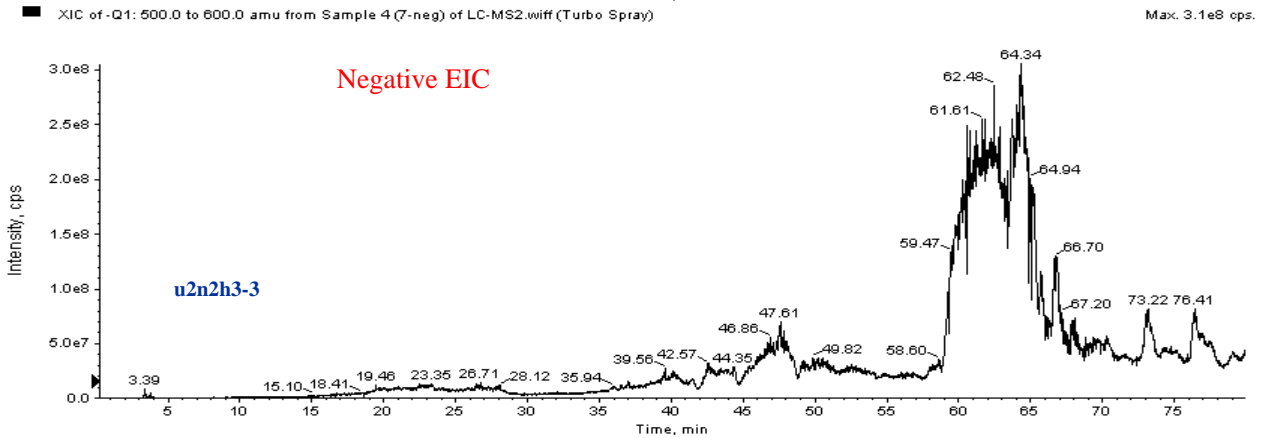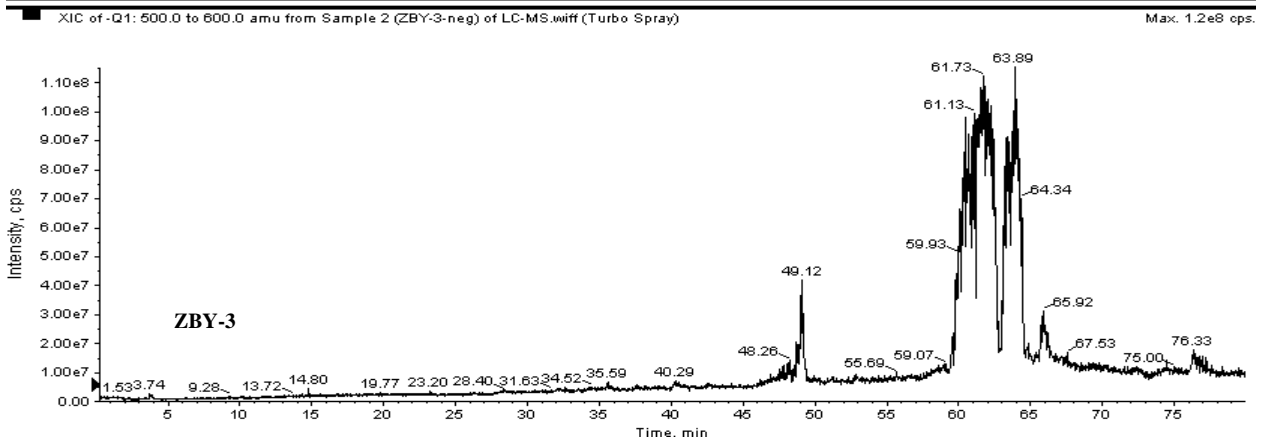

(E4)

Figure S2. Cont.

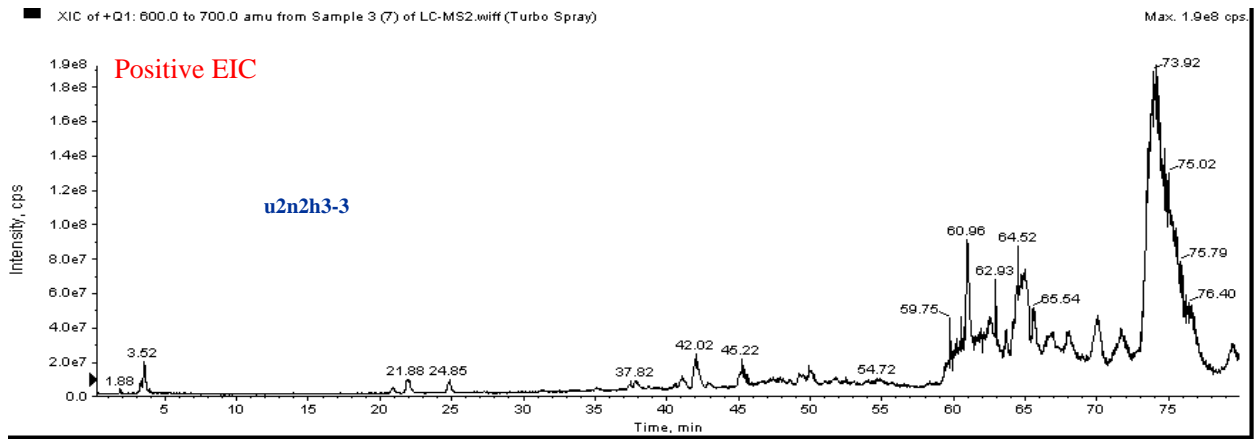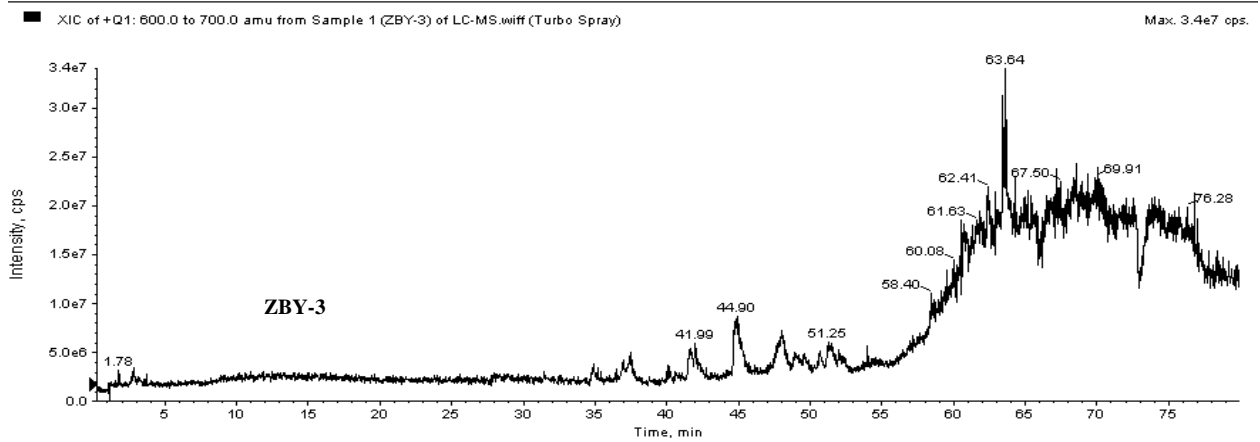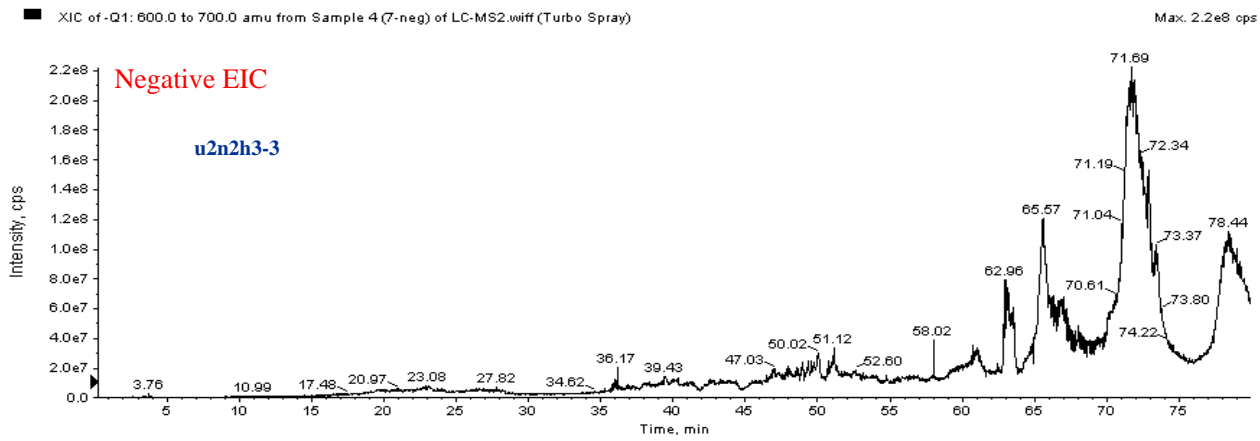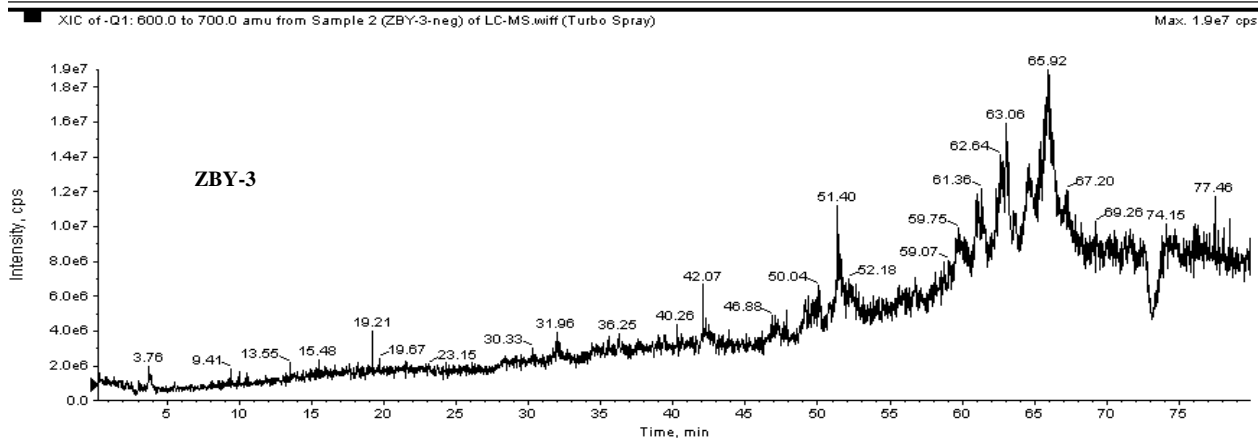

(E5)

Figure S2. Cont.

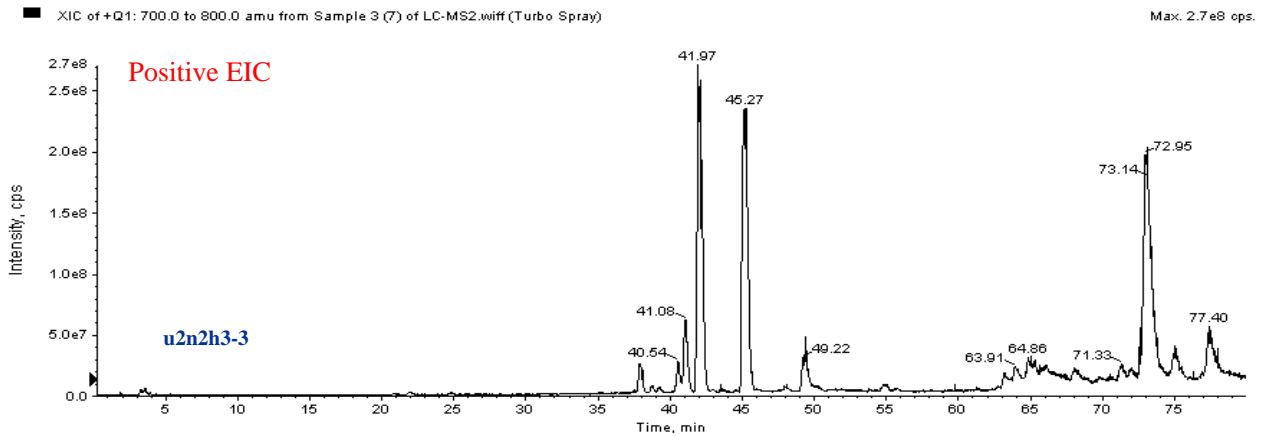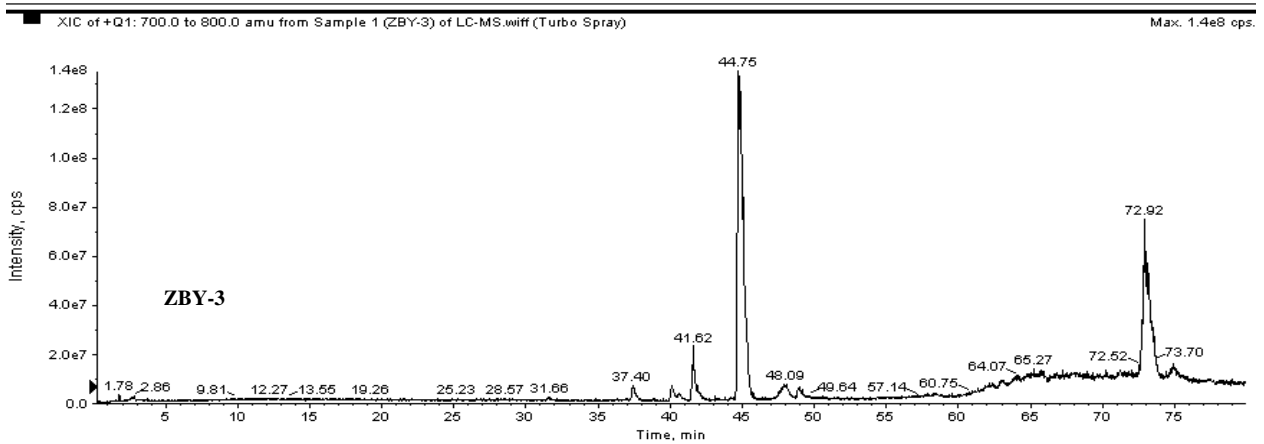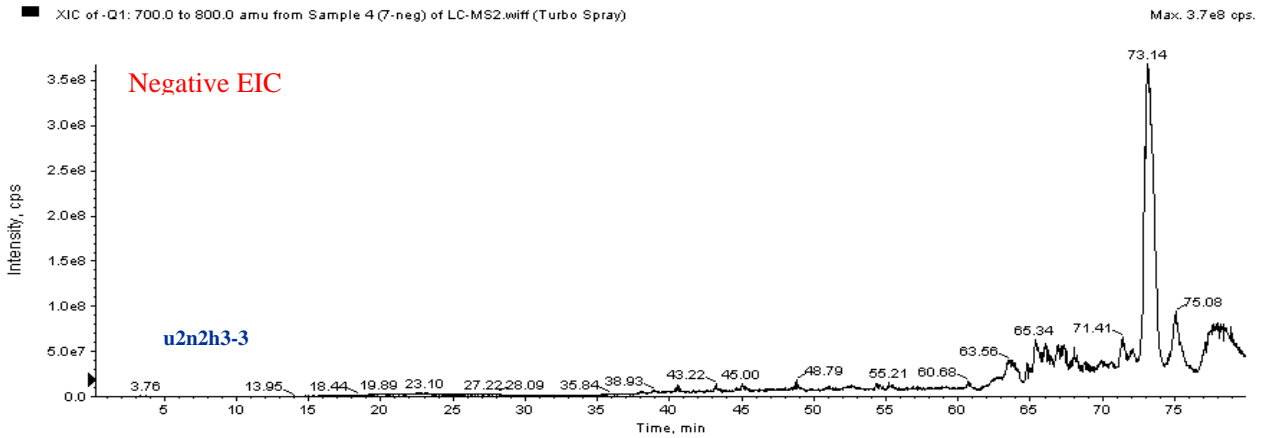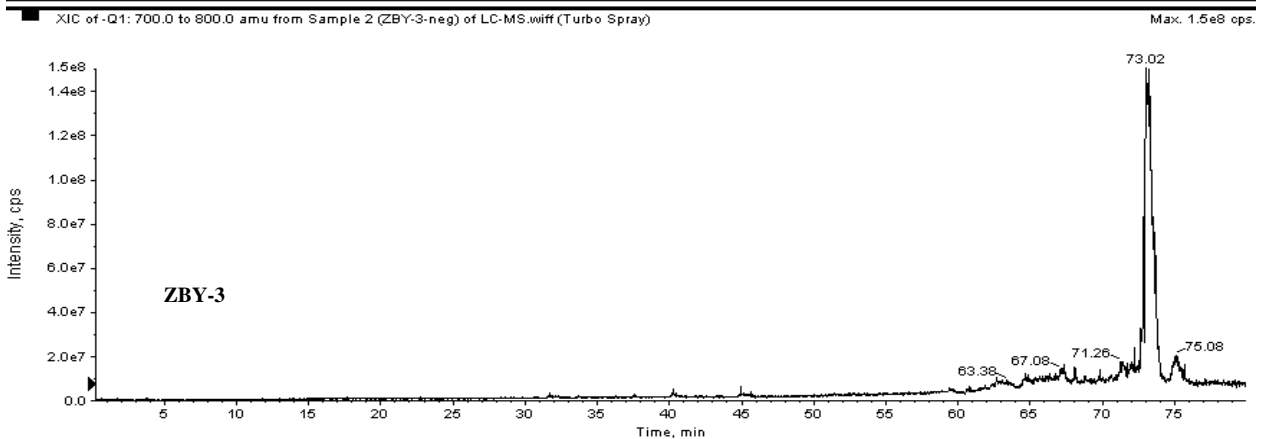

Figure S2. Cont.

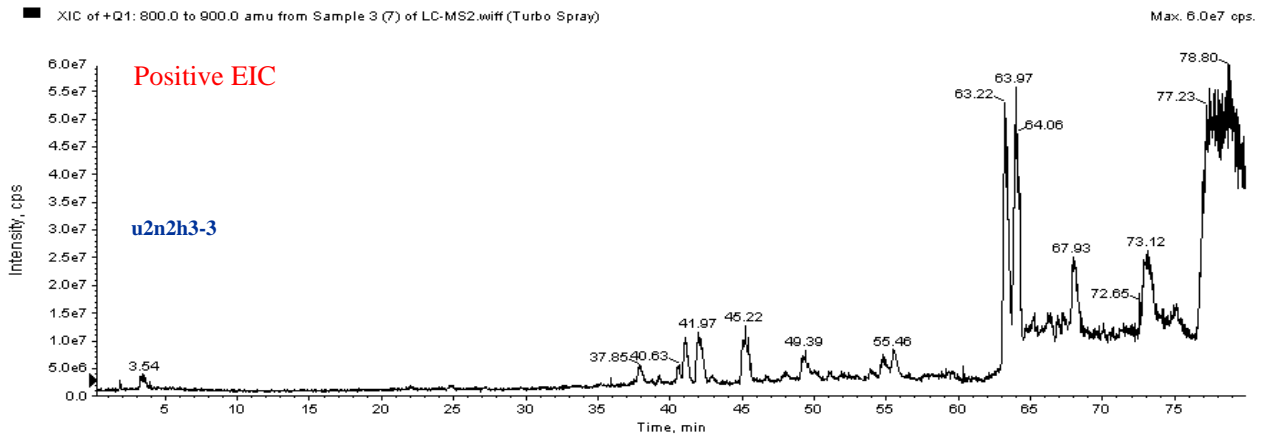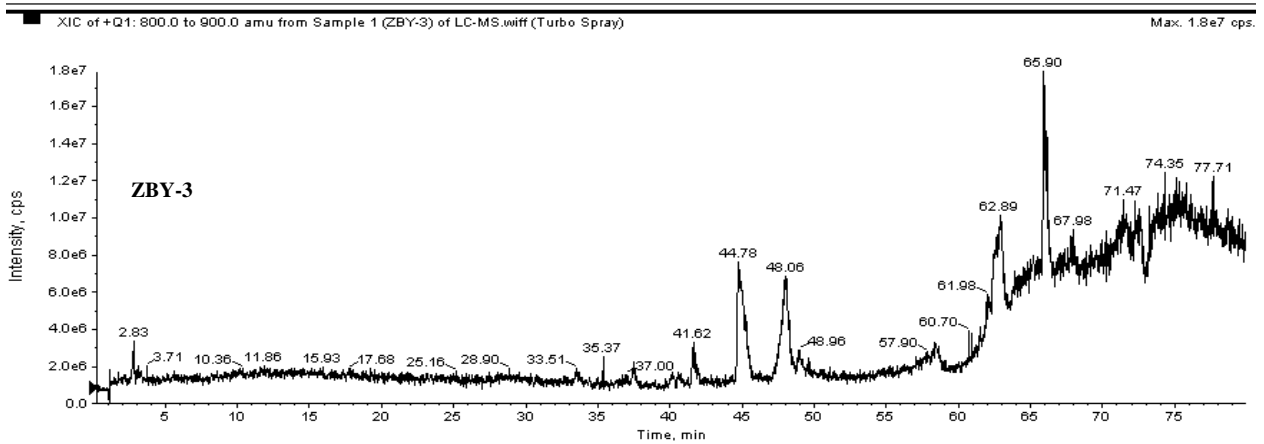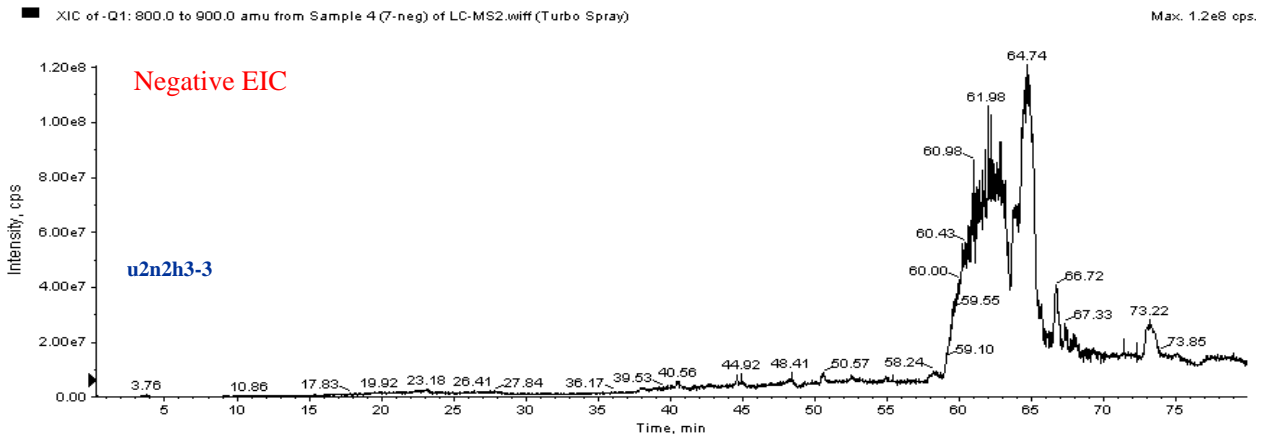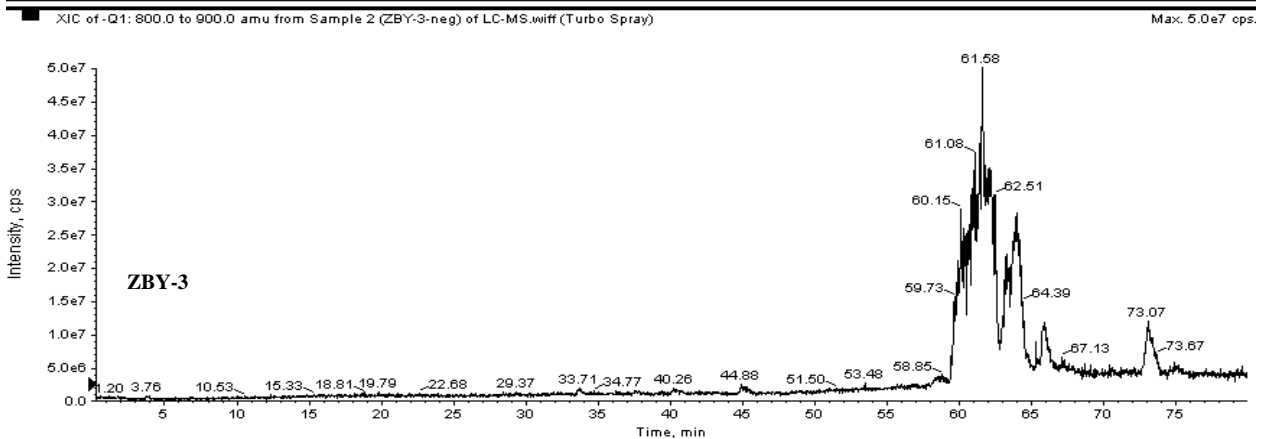

(E7)

Figure S2. Cont.

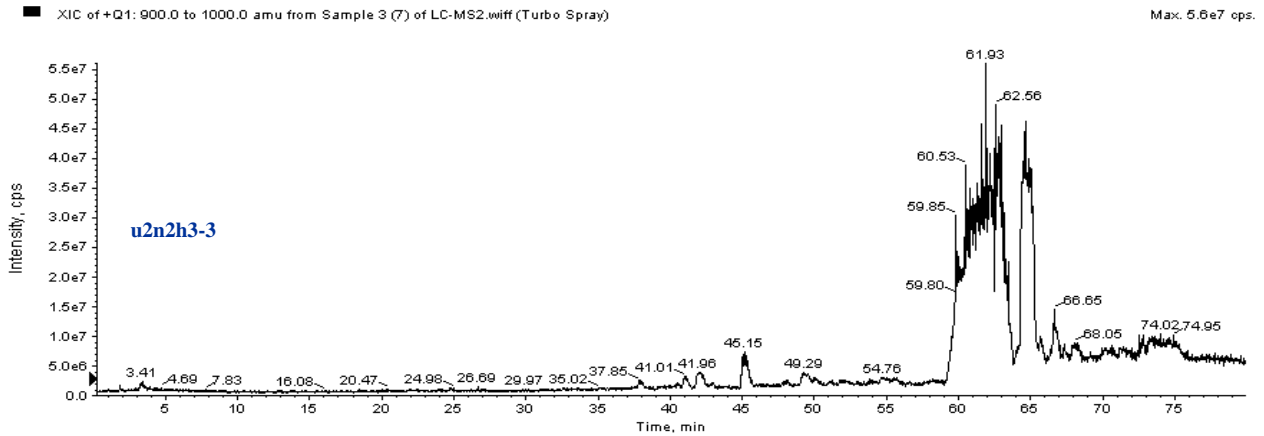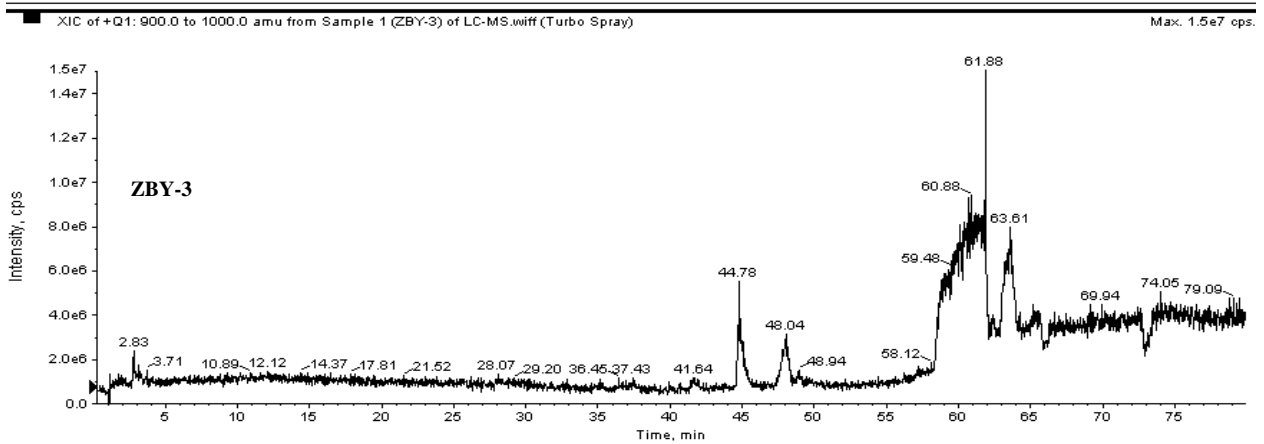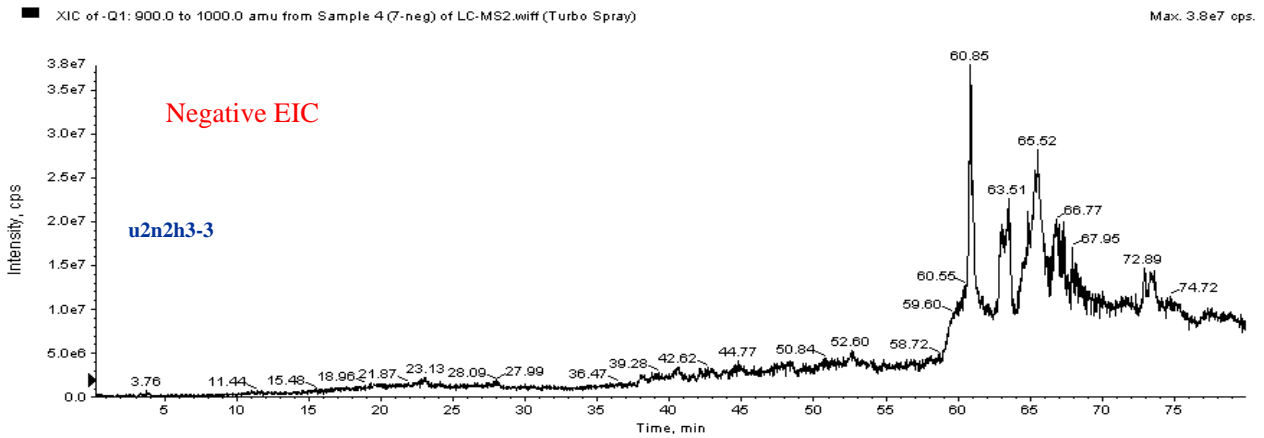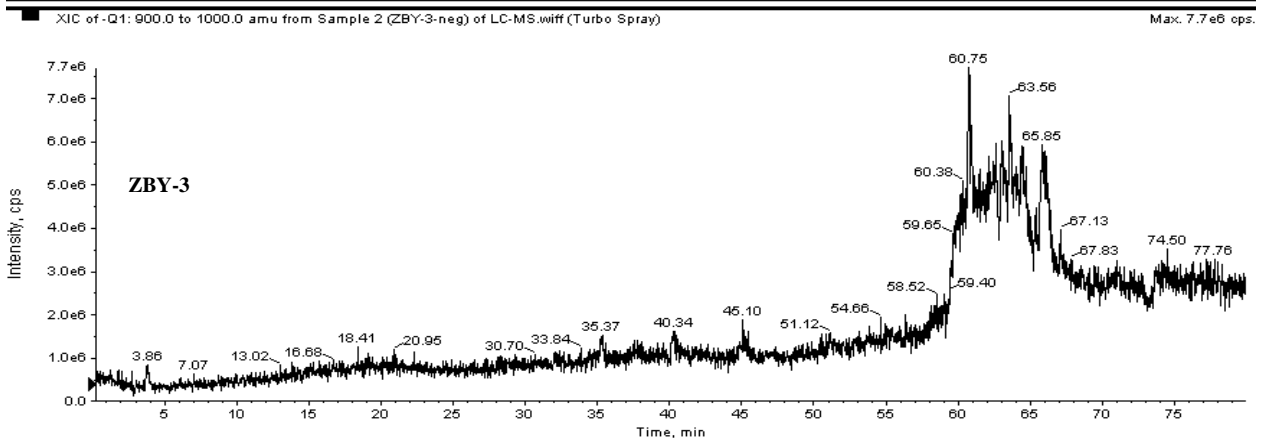

Figure S2. Cont.

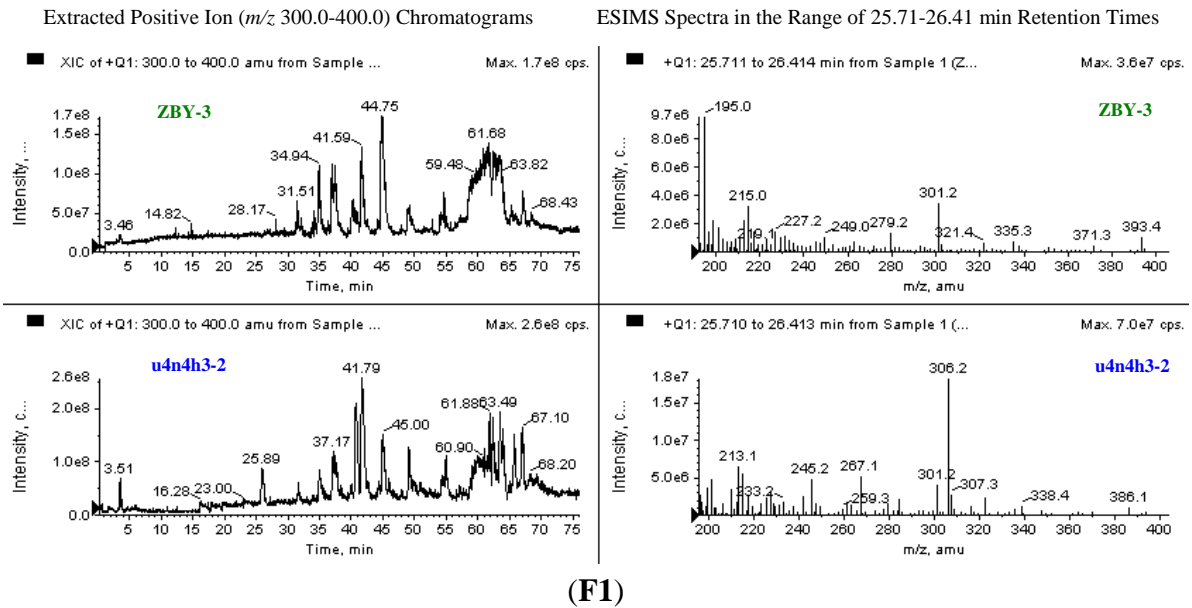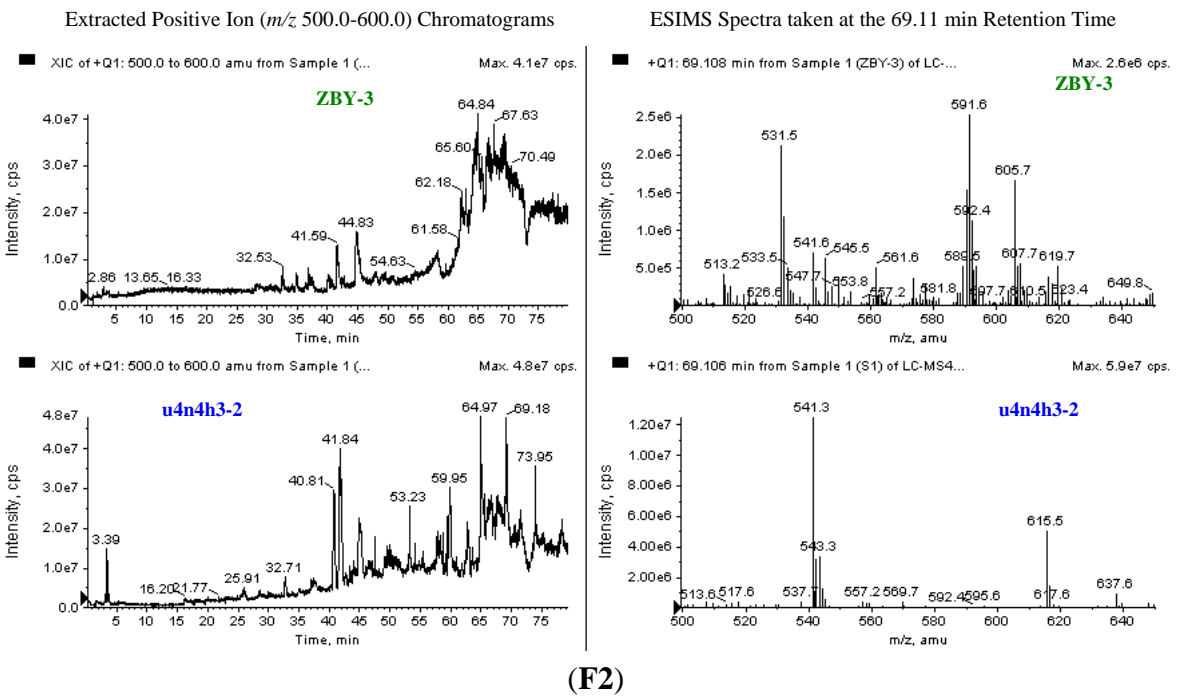



Figure S2. Cont.

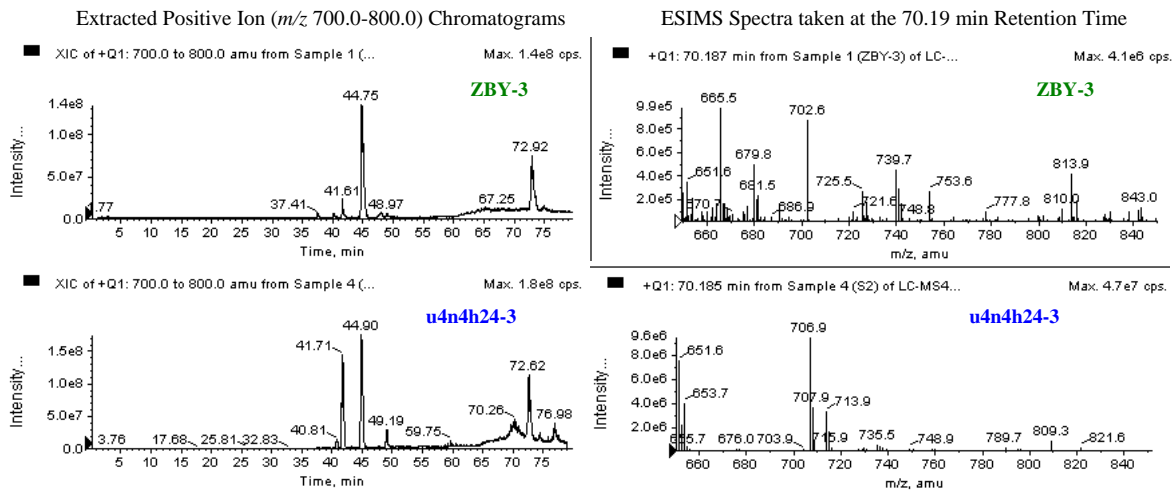

(F3)

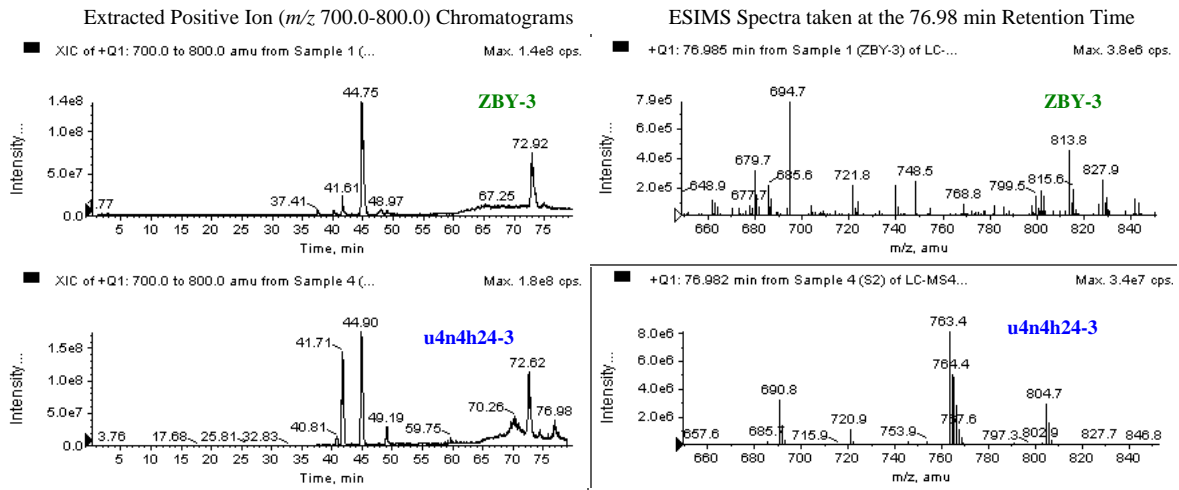

(F4)

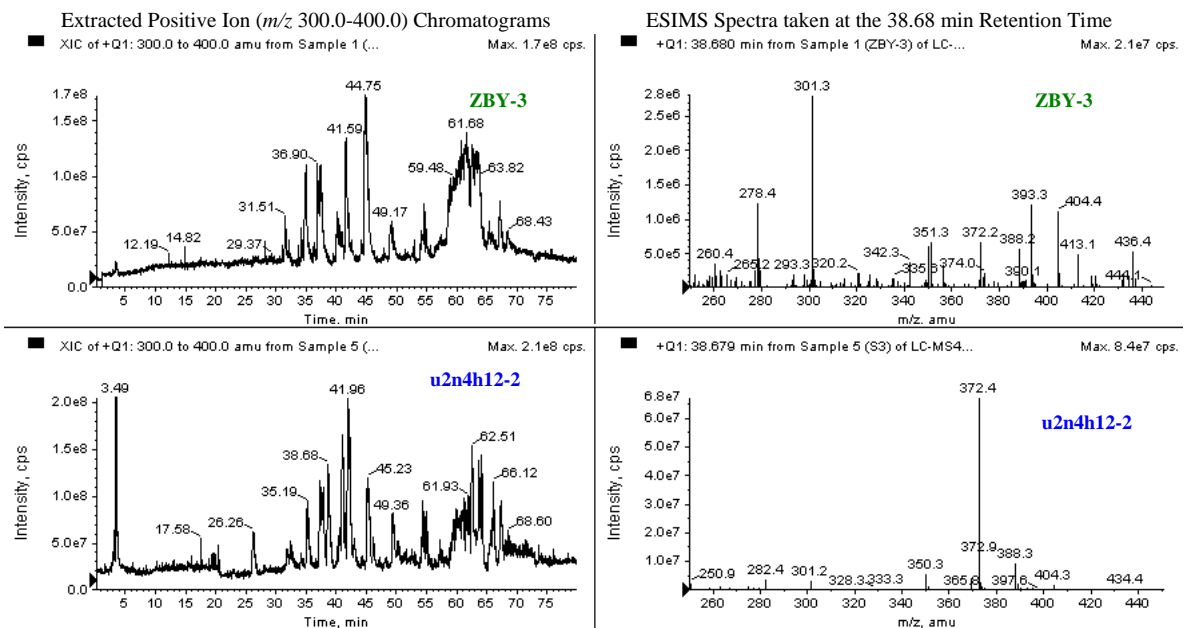

(F5)

Figure S2. Cont.

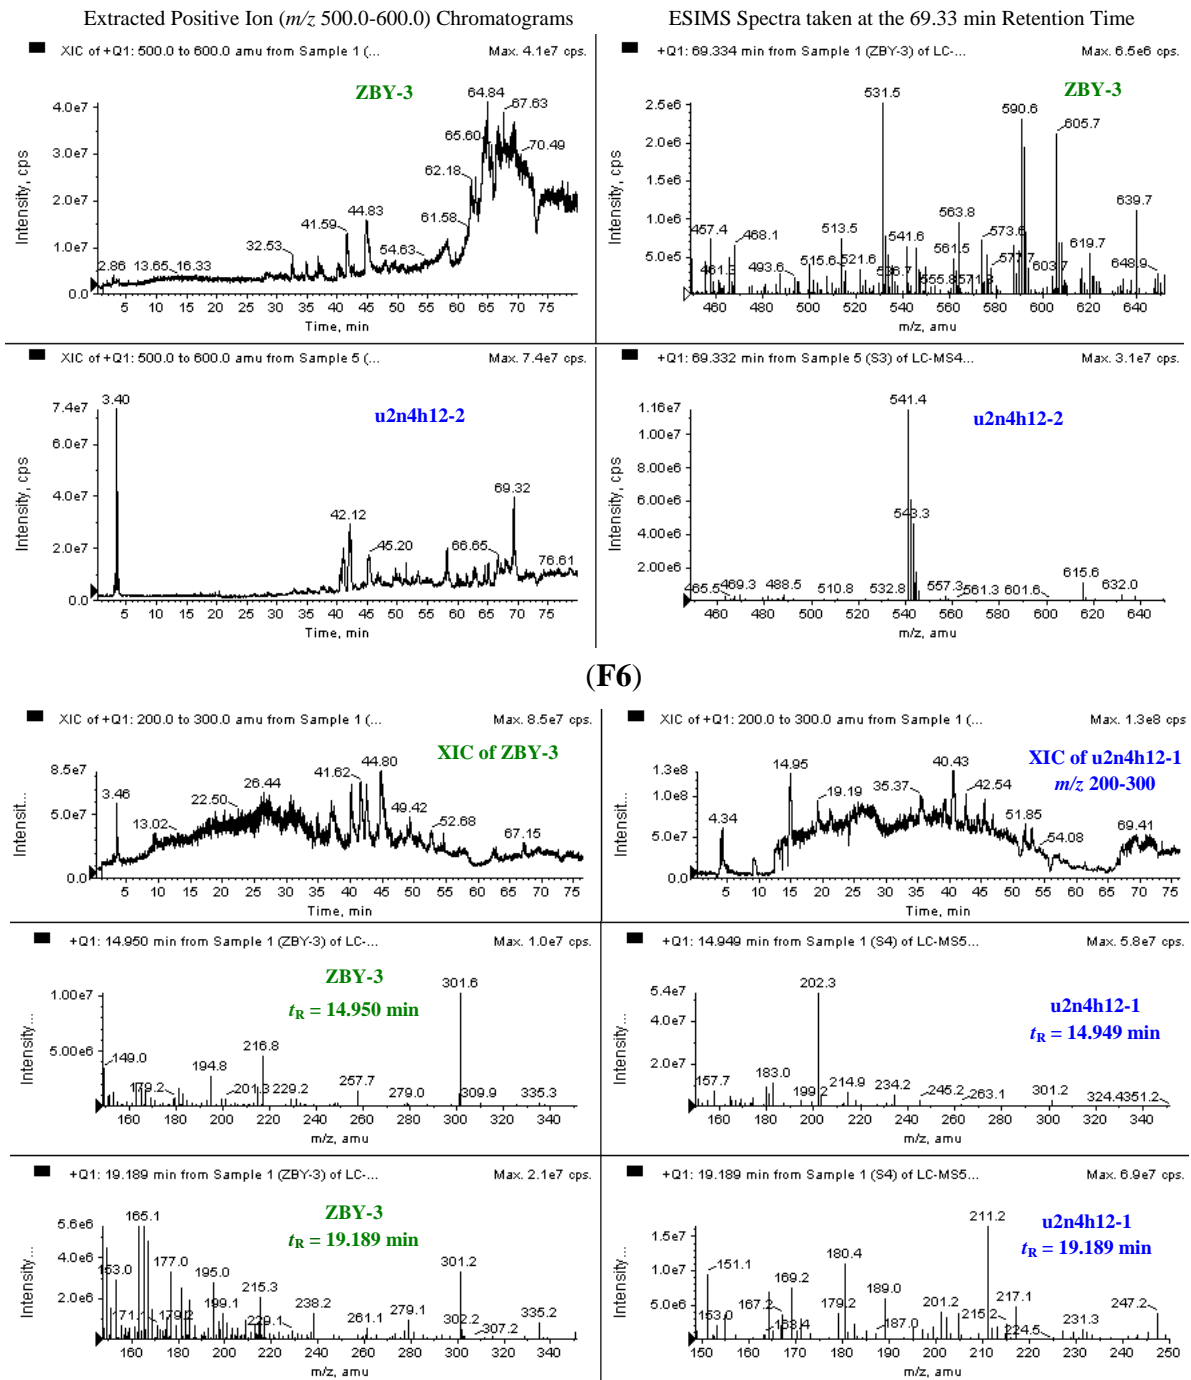

Figure S2. Cont.

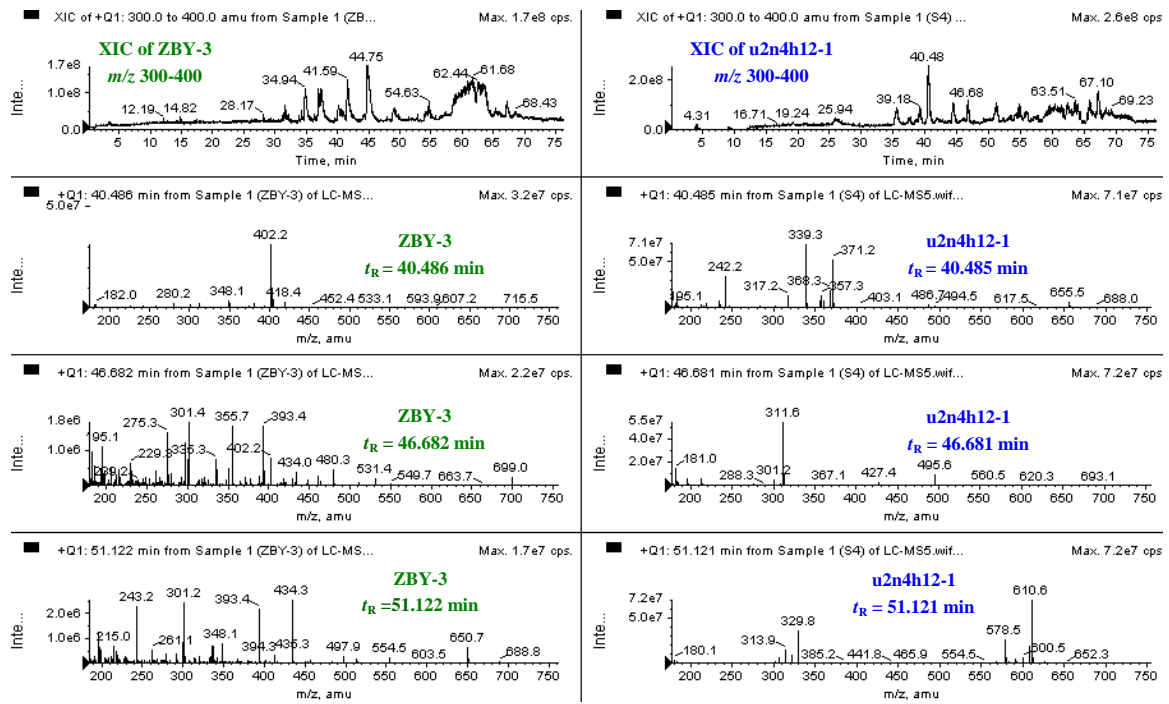

(F8)

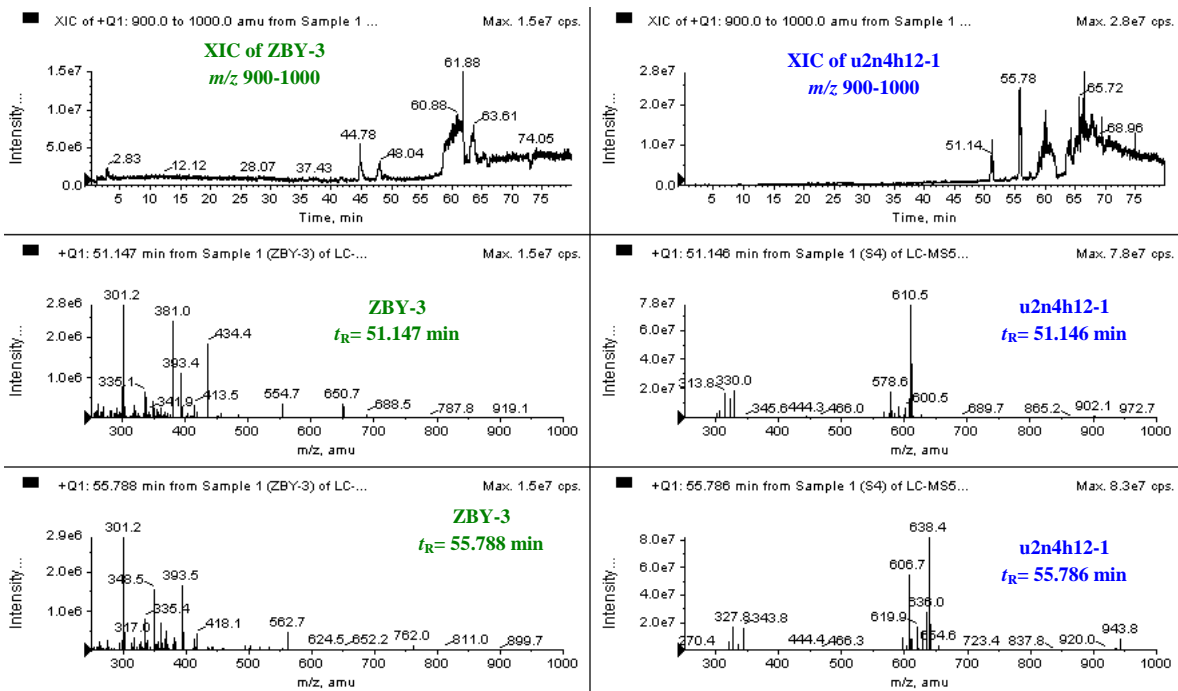

(F9)

Figure S2. Cont.

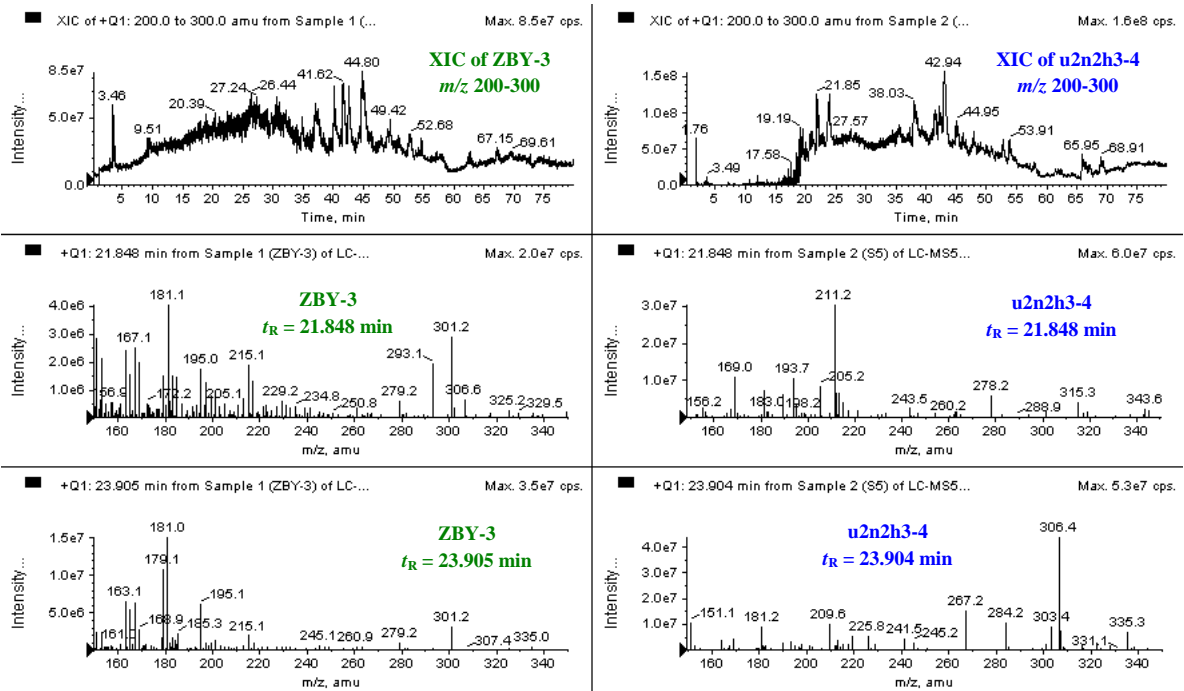

(F10)

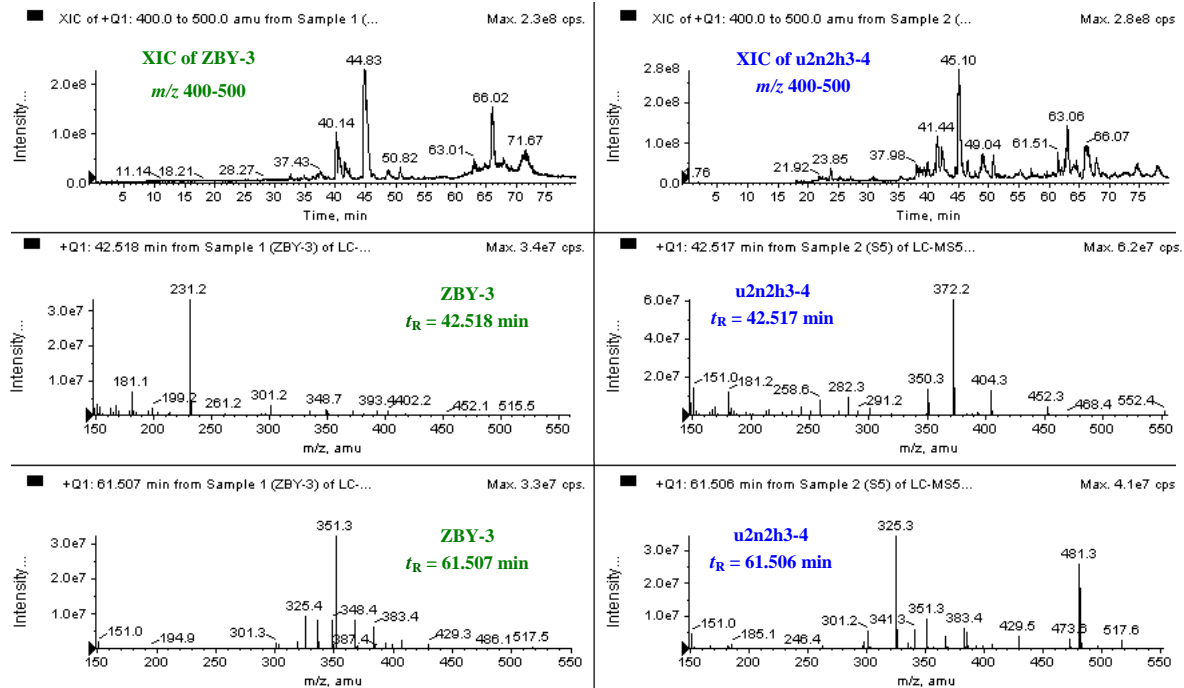

(F11)

Figure S2. Cont.

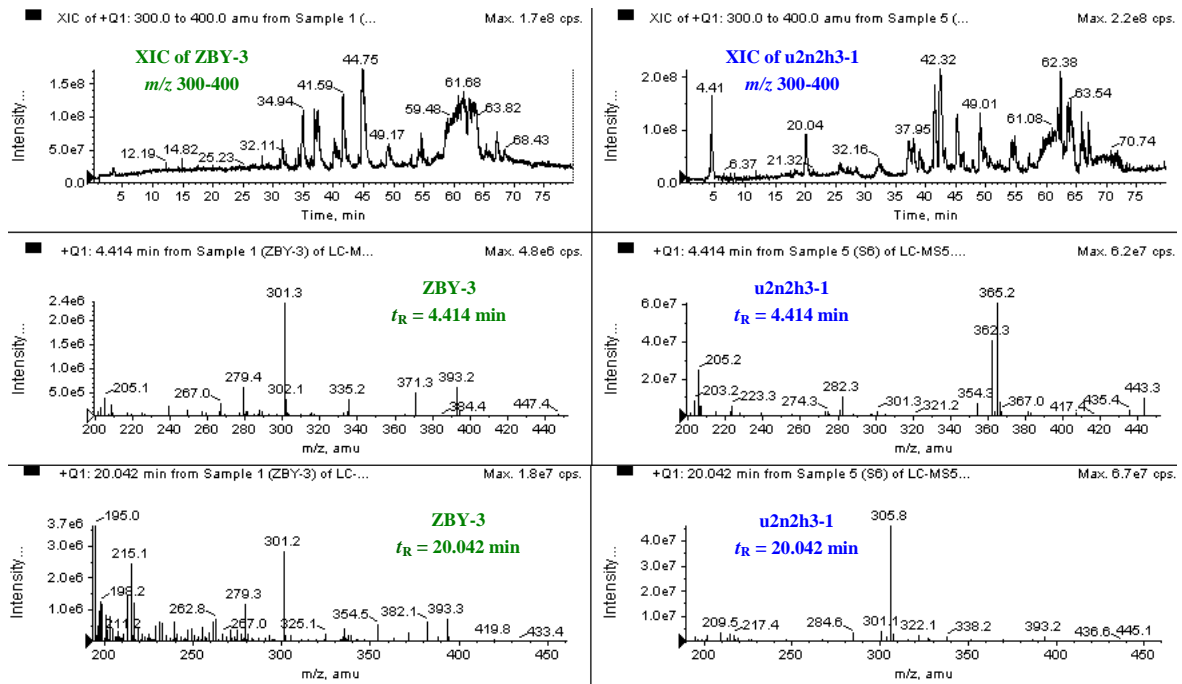

(F12)

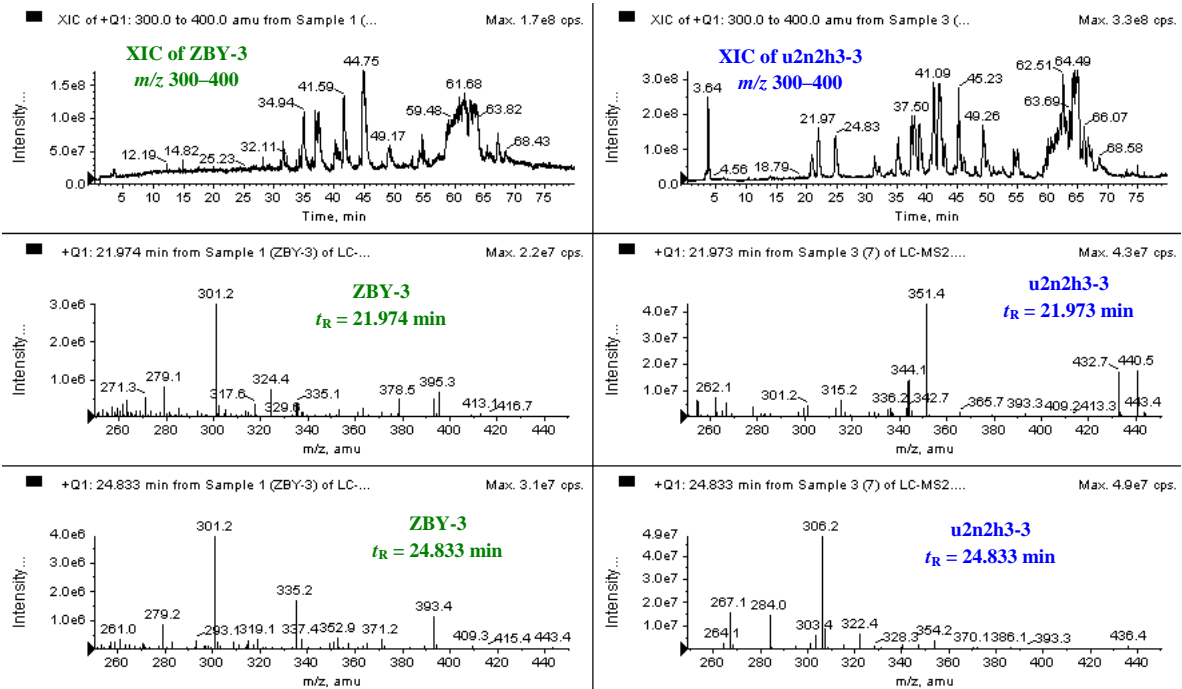

(F13)

Figure S2. Cont.

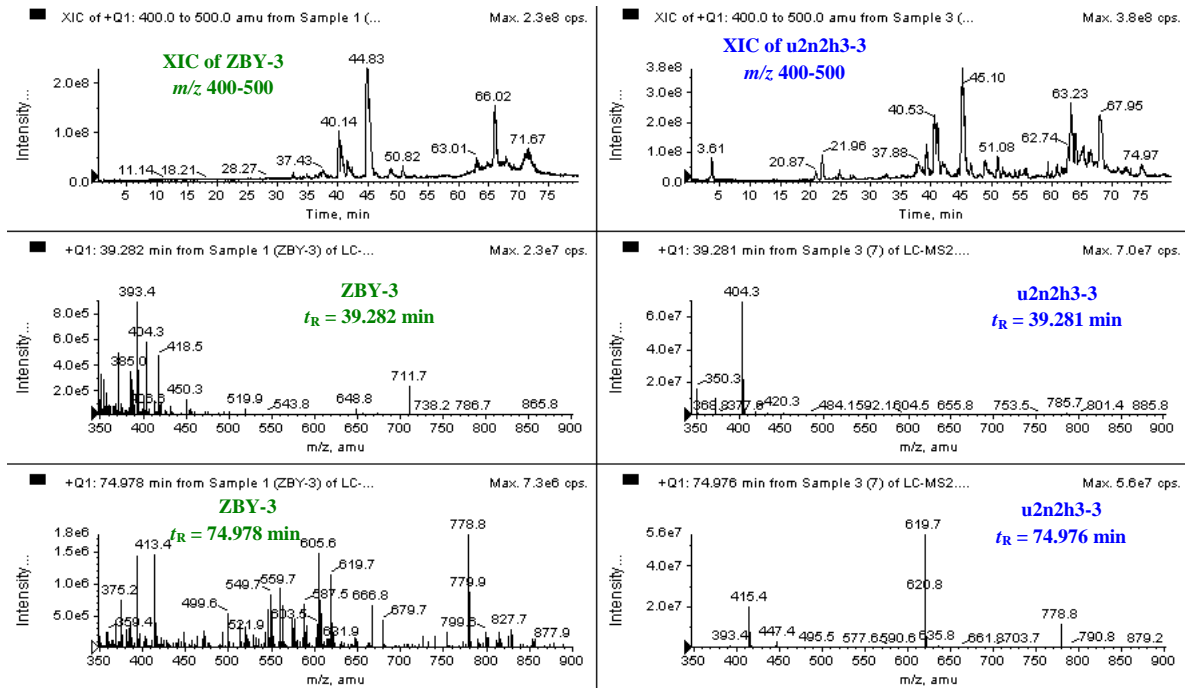

(F14)

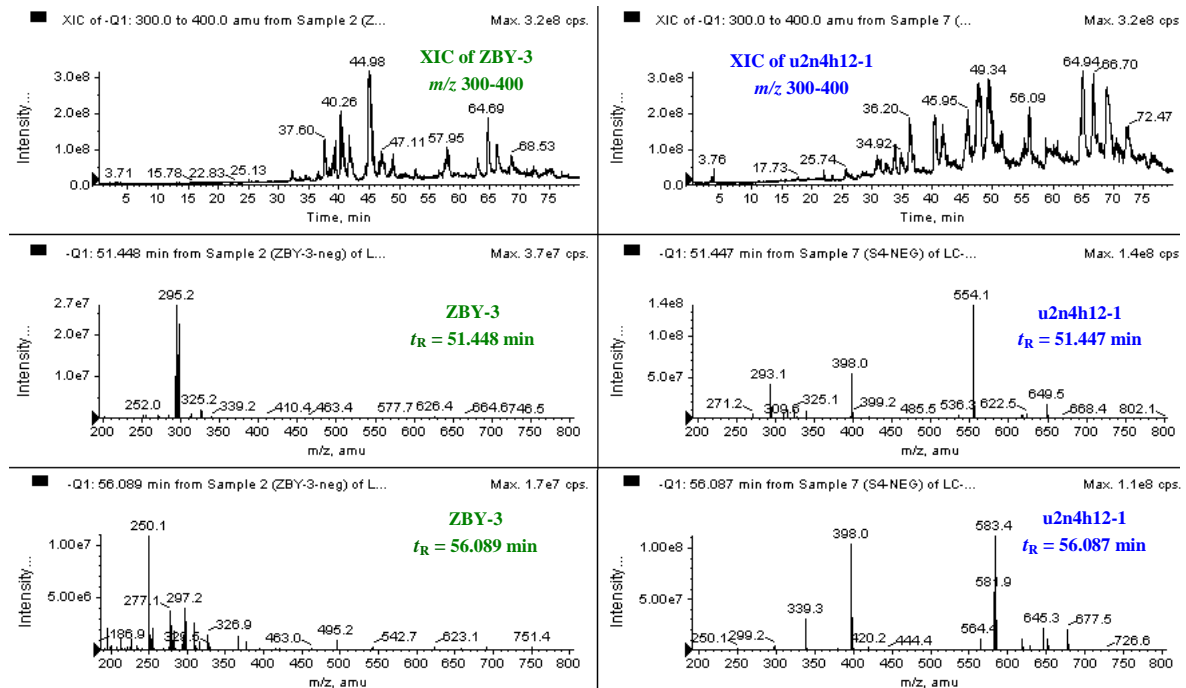

(F15)

Figure S2. Cont.

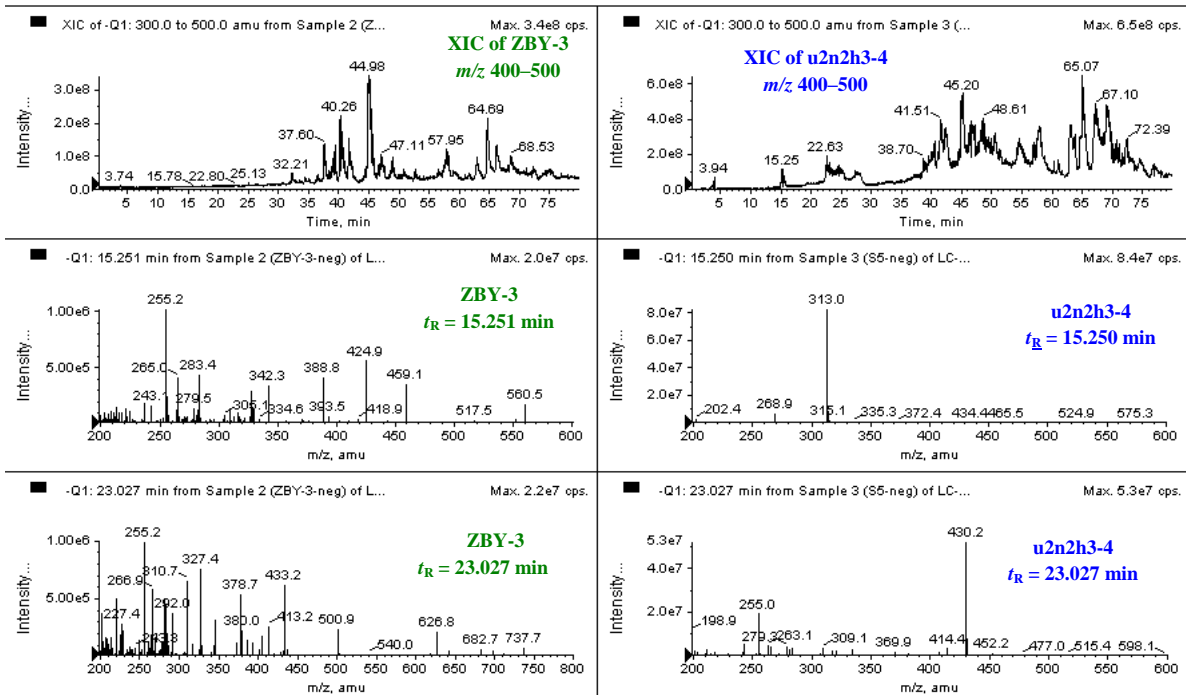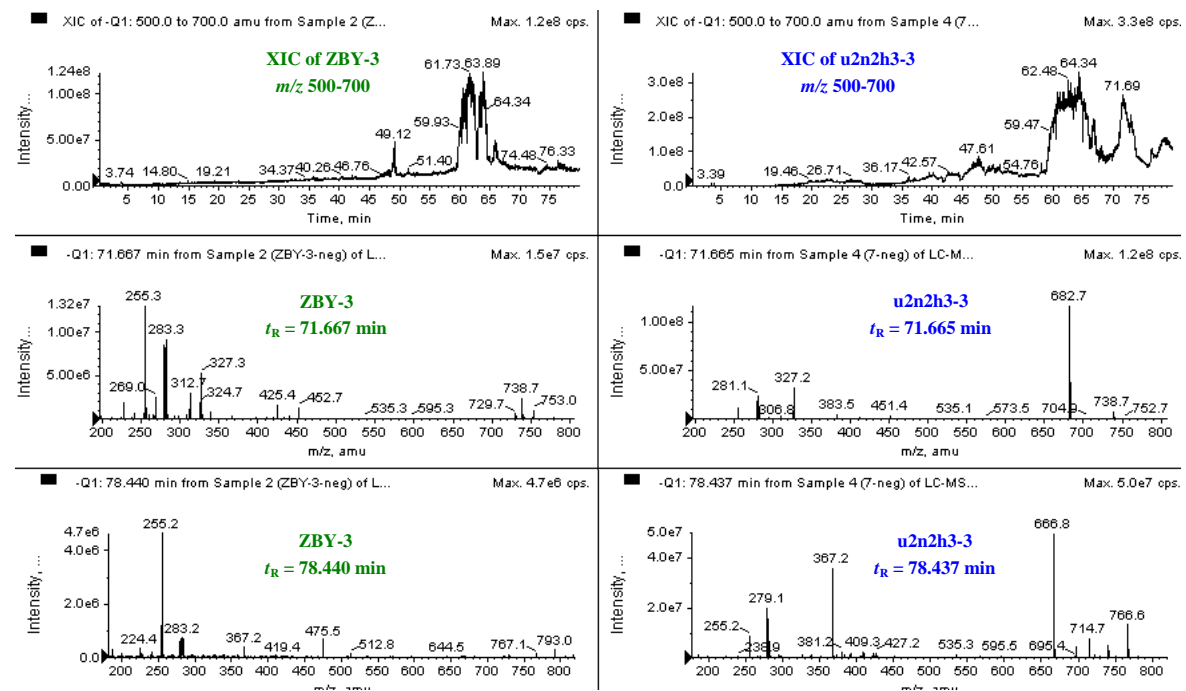

**Figure S3.** HPLC-PDAD-UV analysis of **1–6** and the EtOAc extracts of the mutant u2n2h3-3 and the control ZBY-3 strain. **(A)** HPLC profiles detected at 210 nm; **(B)** HPLC profiles detected at 257 nm; **(C)** UV spectra for detecting **1–6** in the HPLC profiles of u2n2h3-3 and ZBY-3 extract.

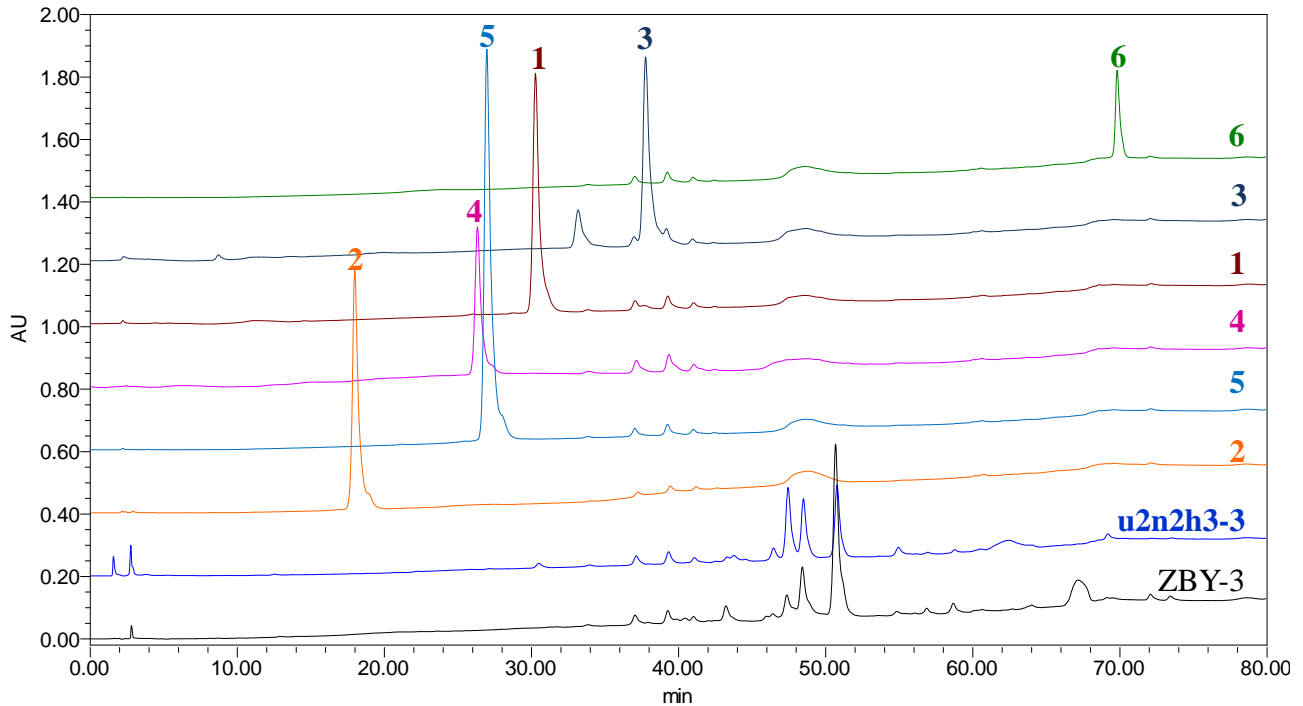

**(A)**

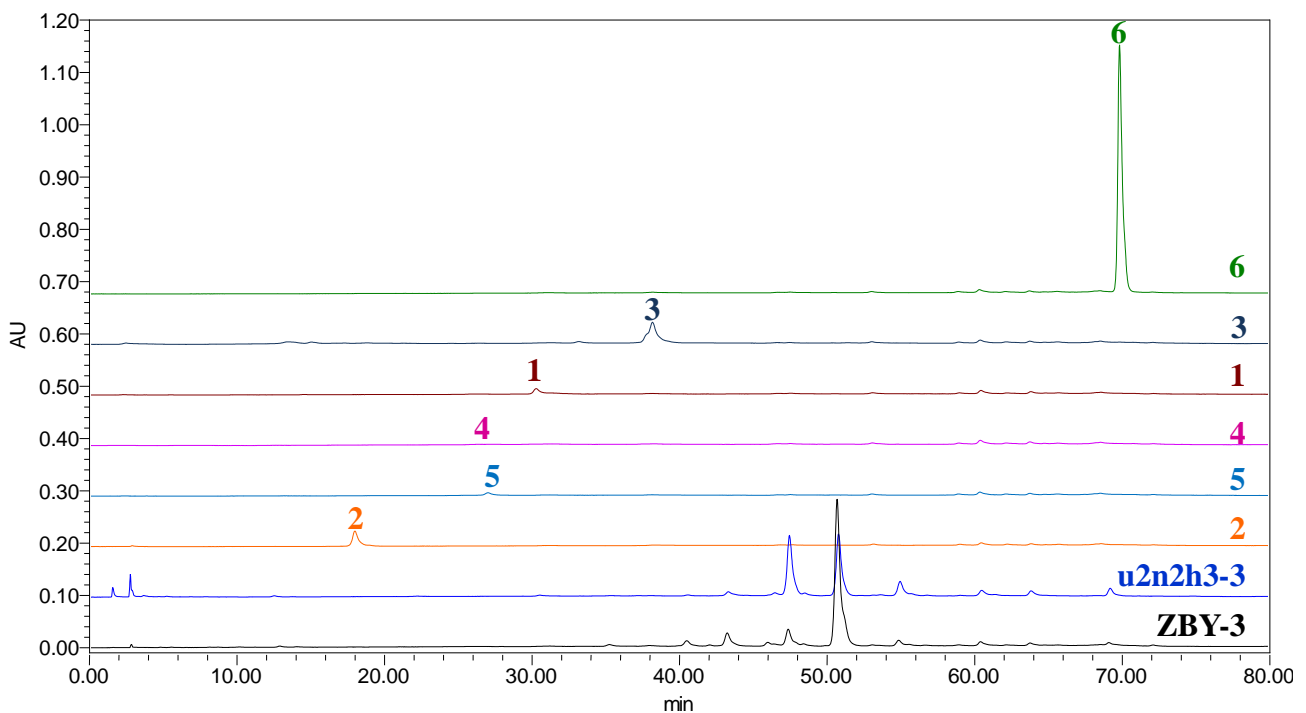

**(B)**



Figure S3. Cont.

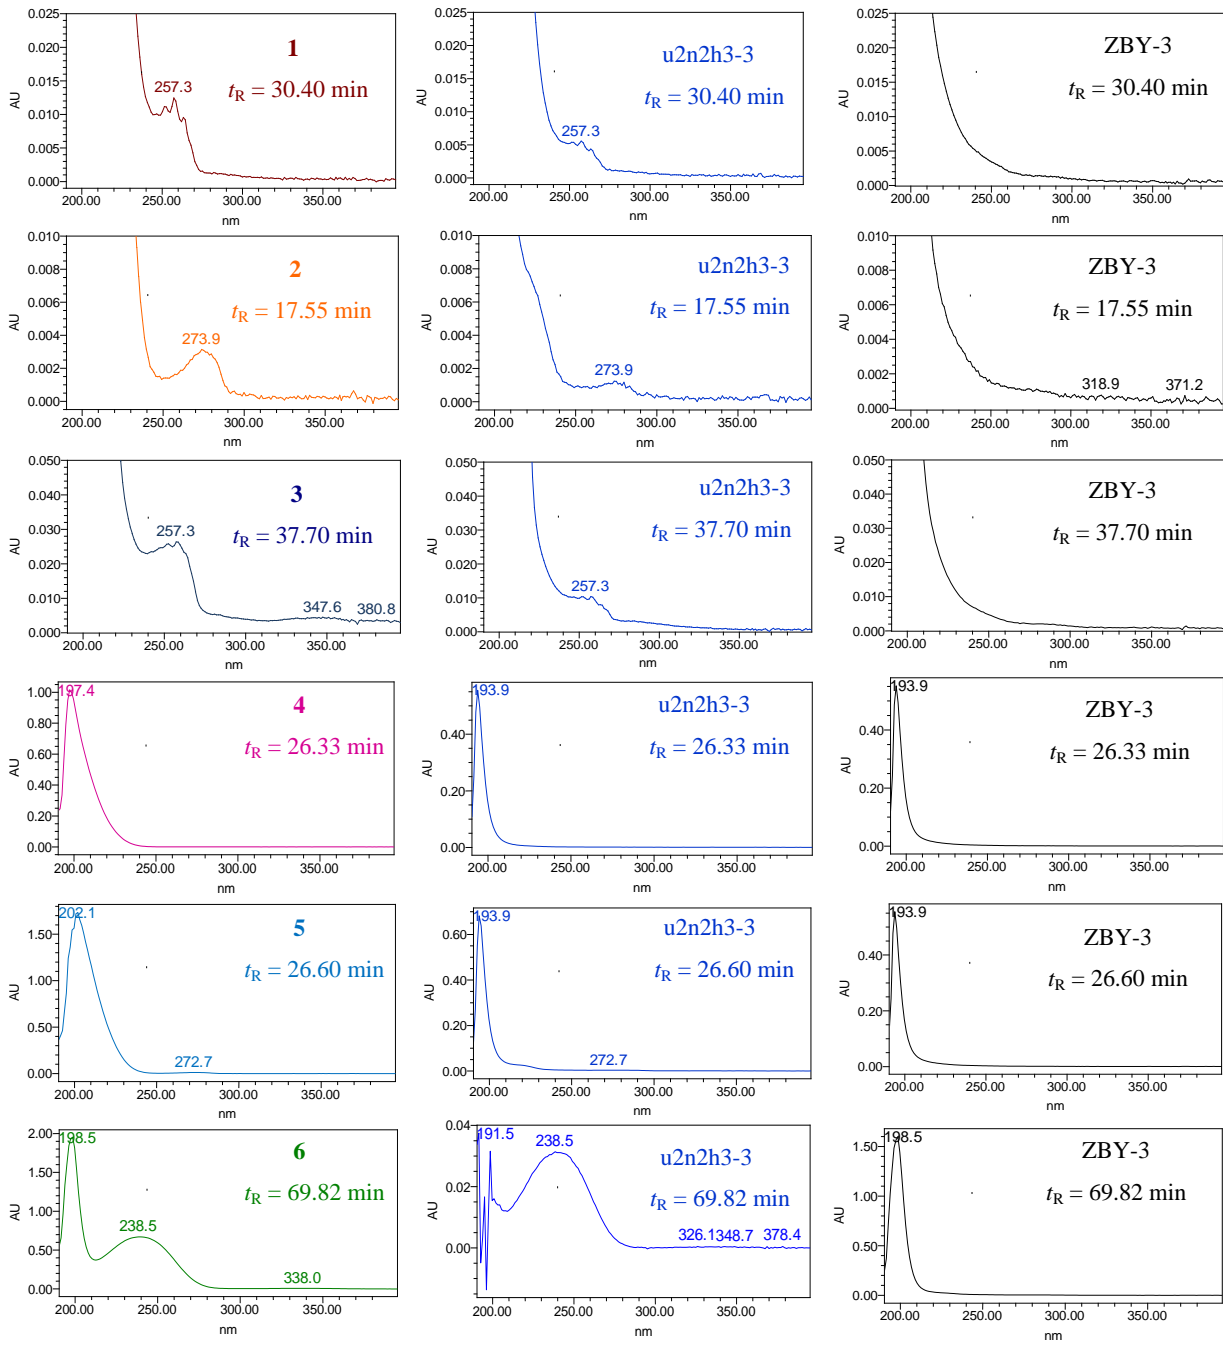

(C)

**Figure S4.** HPLC-ESI-MS analysis of **1–6** and the EtOAc extracts of the mutant *u2n2h3-3* and the control *ZBY-3* strain. **(A)** HPLC-positive ion ESI-MS analysis (ESIMS  $m/z$ : 267  $[M + Na]^+$  for **1**); **(B)** HPLC-negative ion ESI-MS analysis (ESIMS  $m/z$ : 243  $[M - H]^-$  for **1**); **(C)** HPLC-positive ion ESI-MS analysis (ESIMS  $m/z$ : 283  $[M + Na]^+$  for **2**); **(D)** HPLC-negative ion ESI-MS analysis (ESIMS  $m/z$ : 259  $[M - H]^-$  for **2**); **(E)** HPLC-positive ion ESI-MS analysis (ESIMS  $m/z$ : 256  $[M + Na]^+$  for **3**); **(F)** HPLC-positive ion ESI-MS analysis (ESIMS  $m/z$ : 233  $[M + Na]^+$  for **4**); **(G)** HPLC-positive ion ESI-MS analysis (ESIMS  $m/z$ : 233  $[M + Na]^+$  for **5**); **(H)** HPLC-negative ion ESI-MS analysis (ESIMS  $m/z$ : 209  $[M - H]^-$  for **5**); **(I)** HPLC-positive ion ESI-MS analysis (ESIMS  $m/z$ : 467  $[M + Na]^+$  for **6**); **(J)** HPLC-negative ion ESI-MS analysis (ESIMS  $m/z$ : 443  $[M - H]^-$  for **6**).

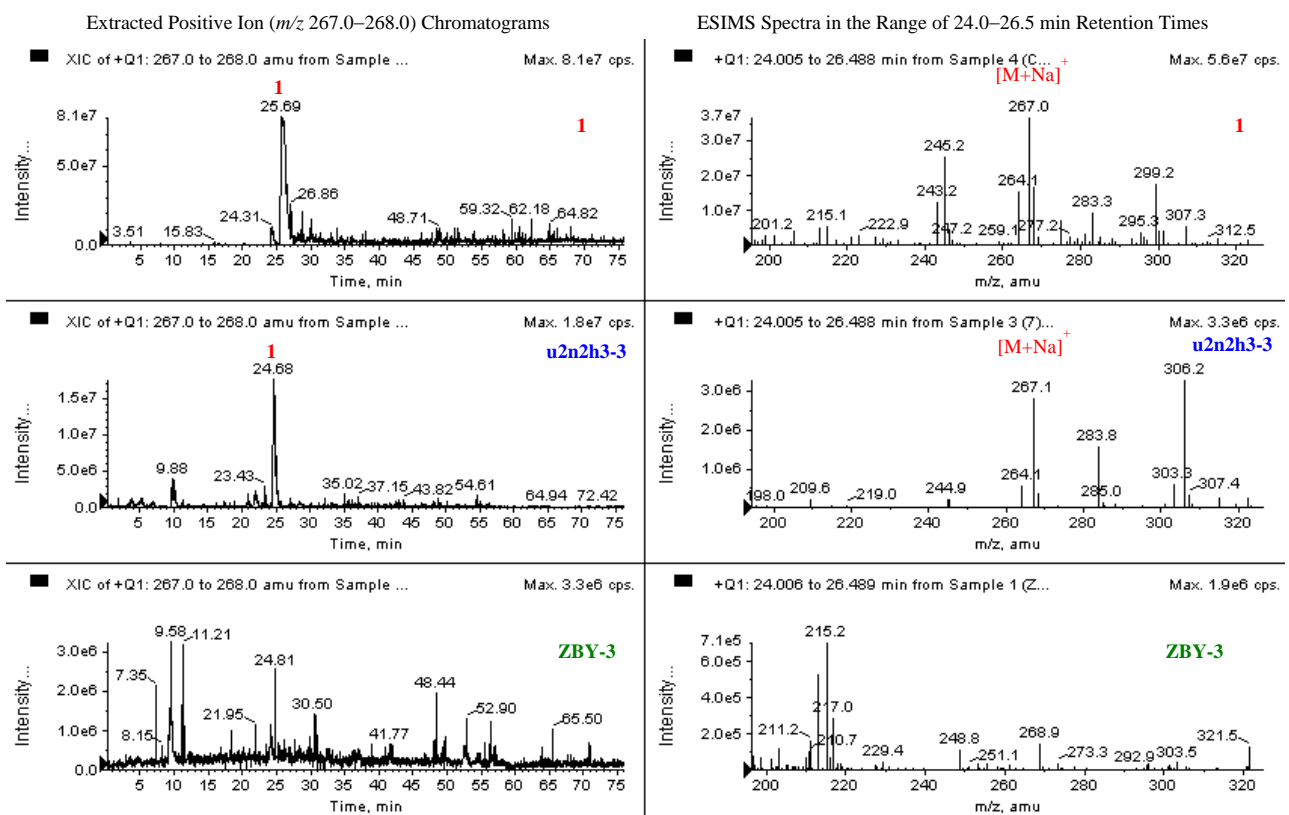

(A)

Figure S4. Cont.

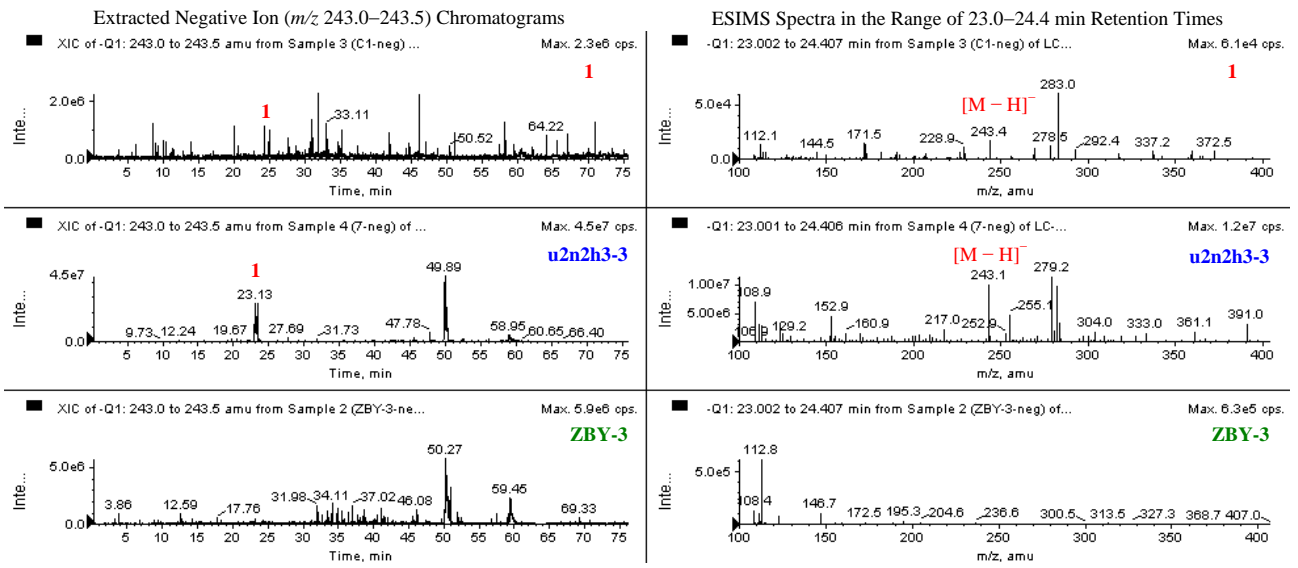

(B)

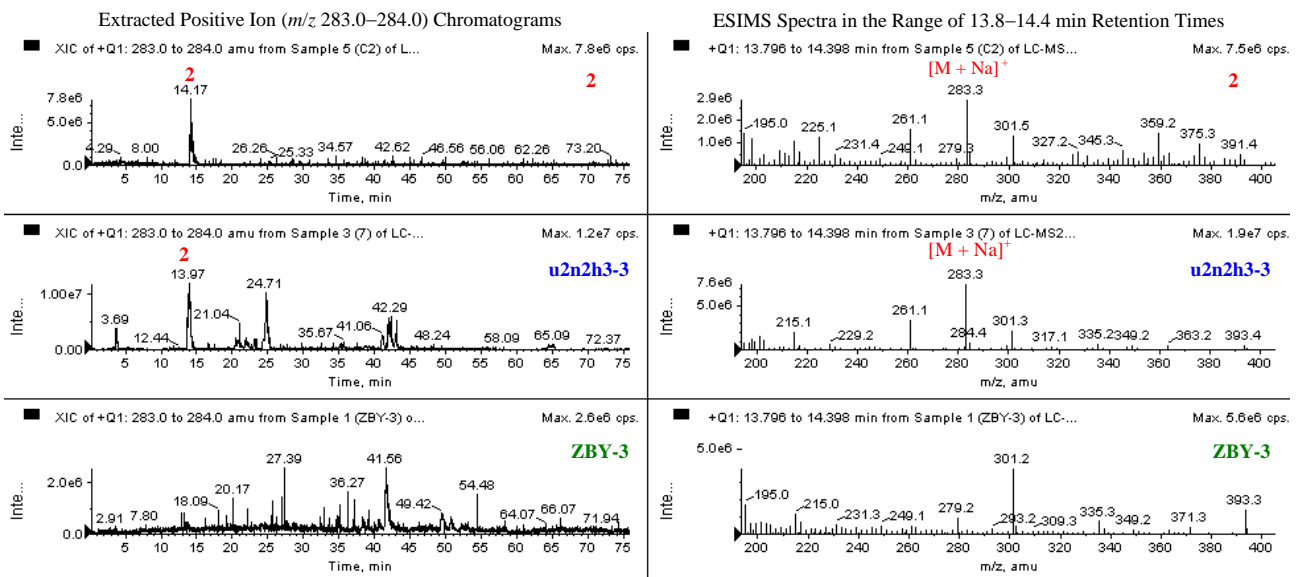

(C)

Figure S4. Cont.

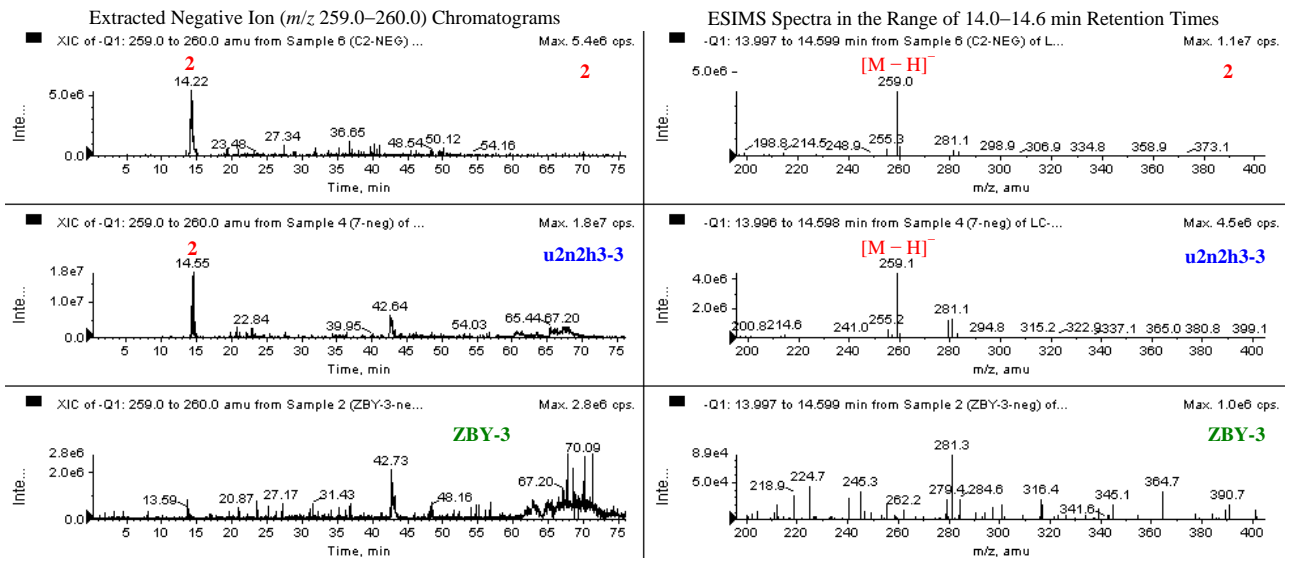

(D)

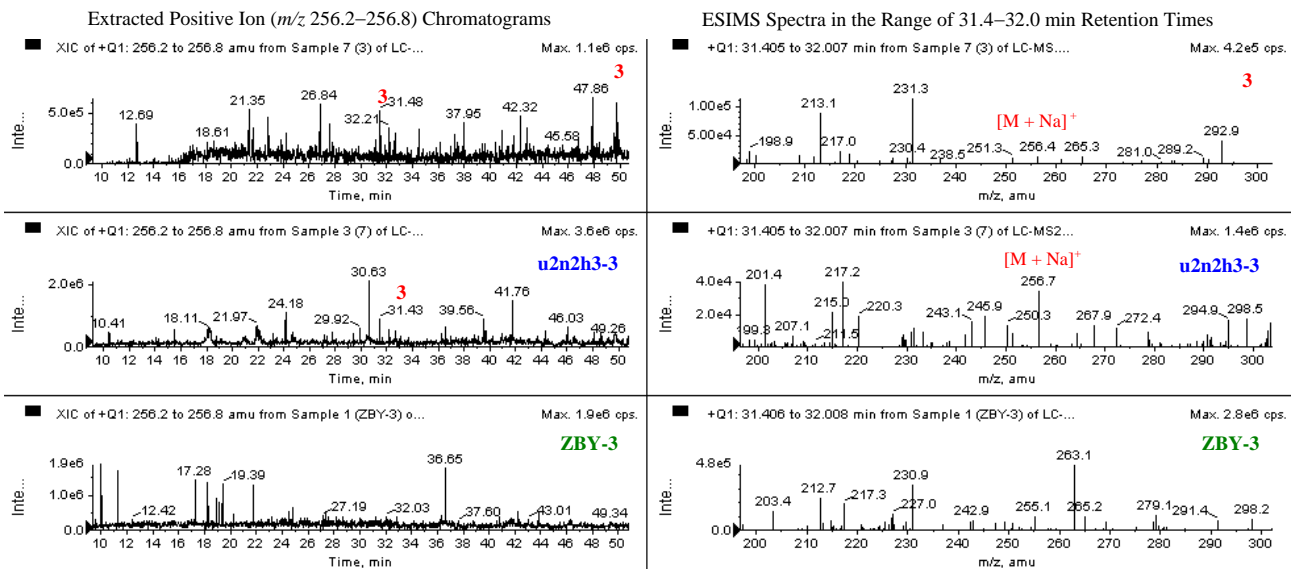

(E)

Figure S4. Cont.

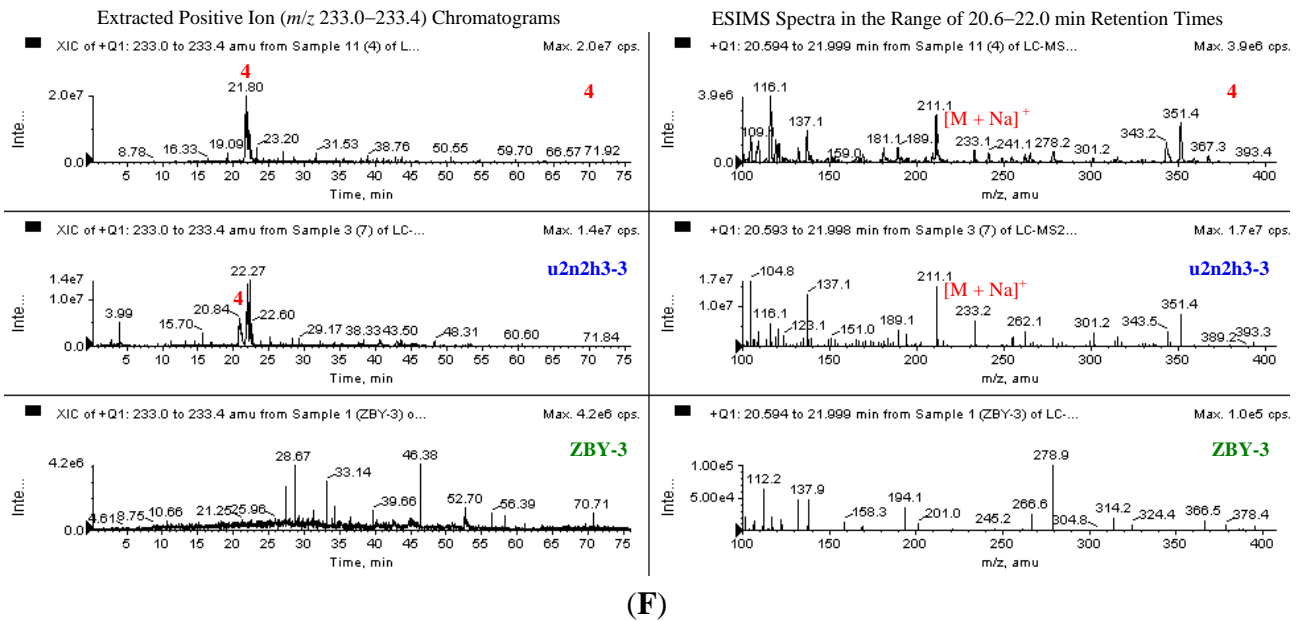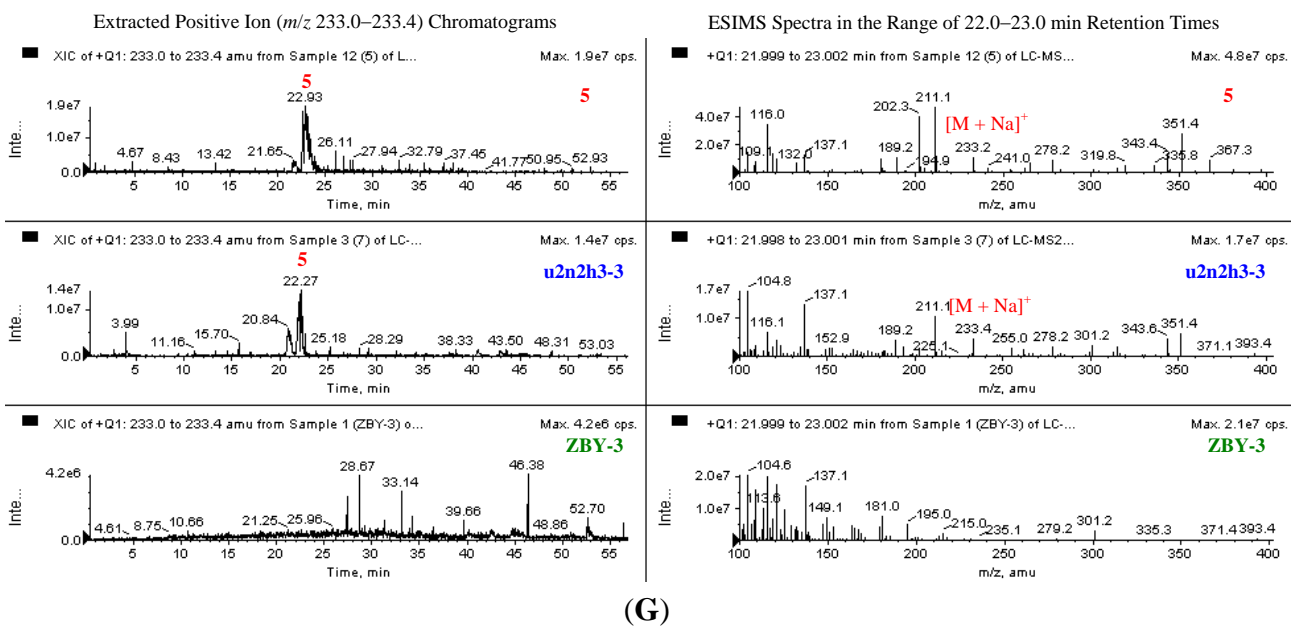

Figure S4. Cont.

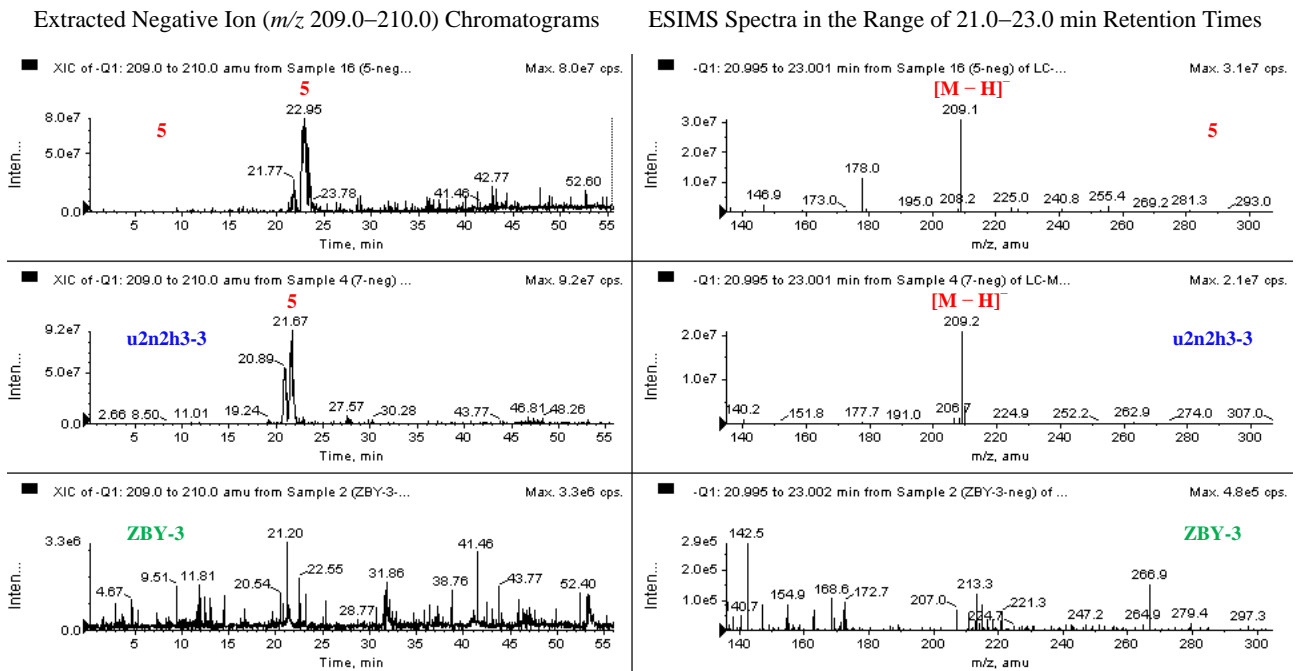

(H)

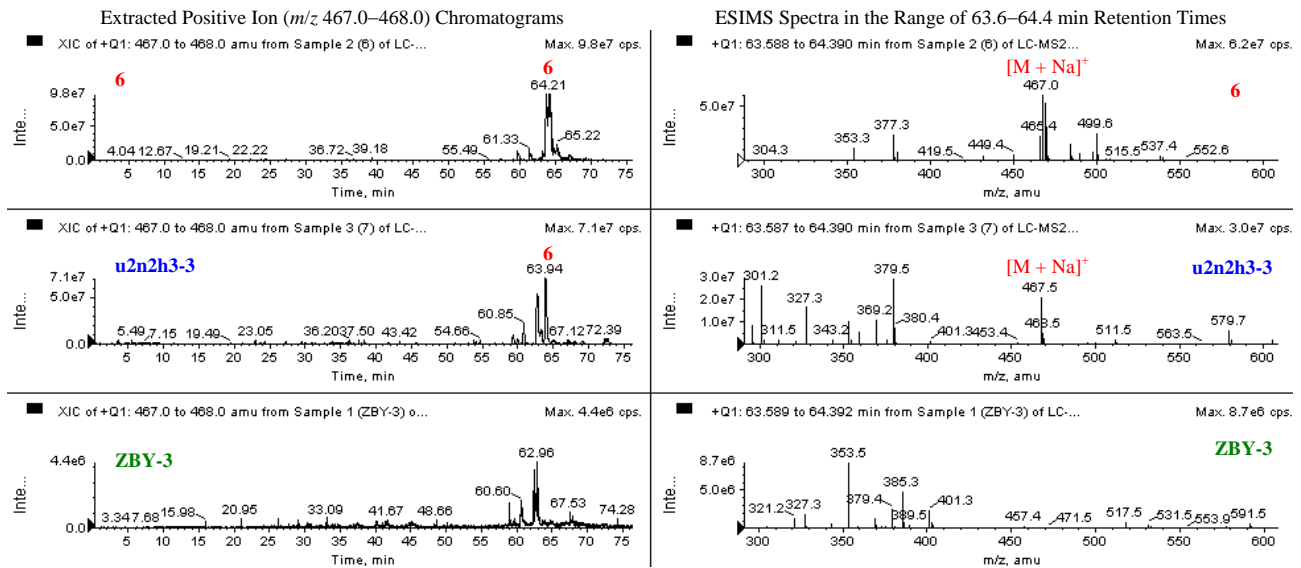

(I)

Figure S4. Cont.

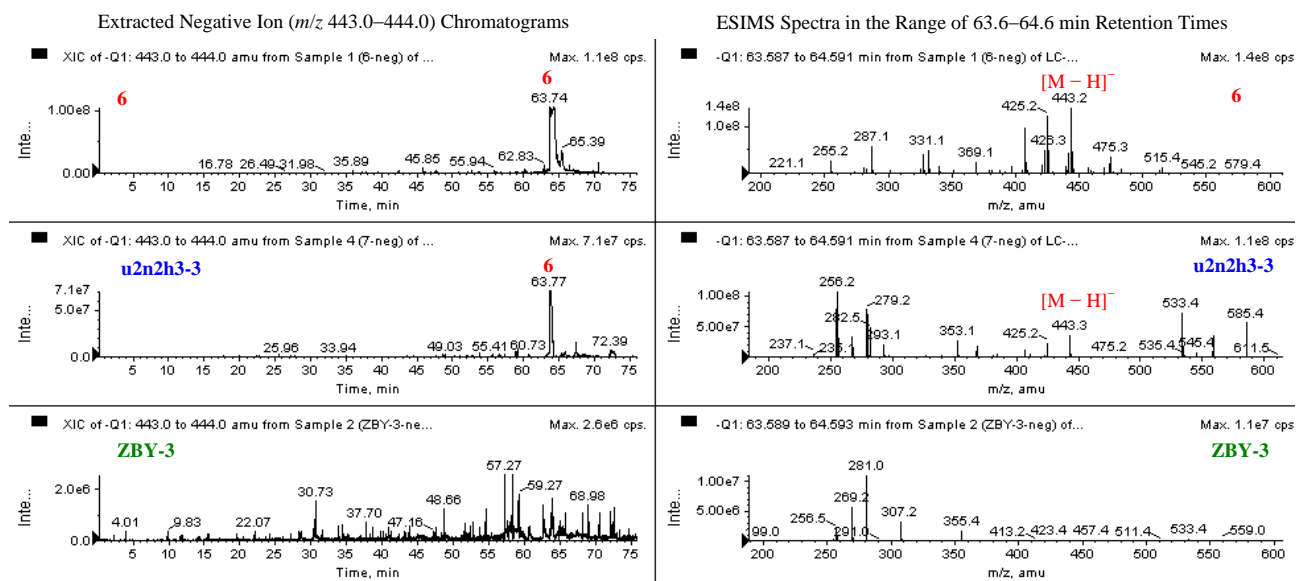

(J)

Figure S5. Positive ESI-MS and HR-ESI-MS of 3.

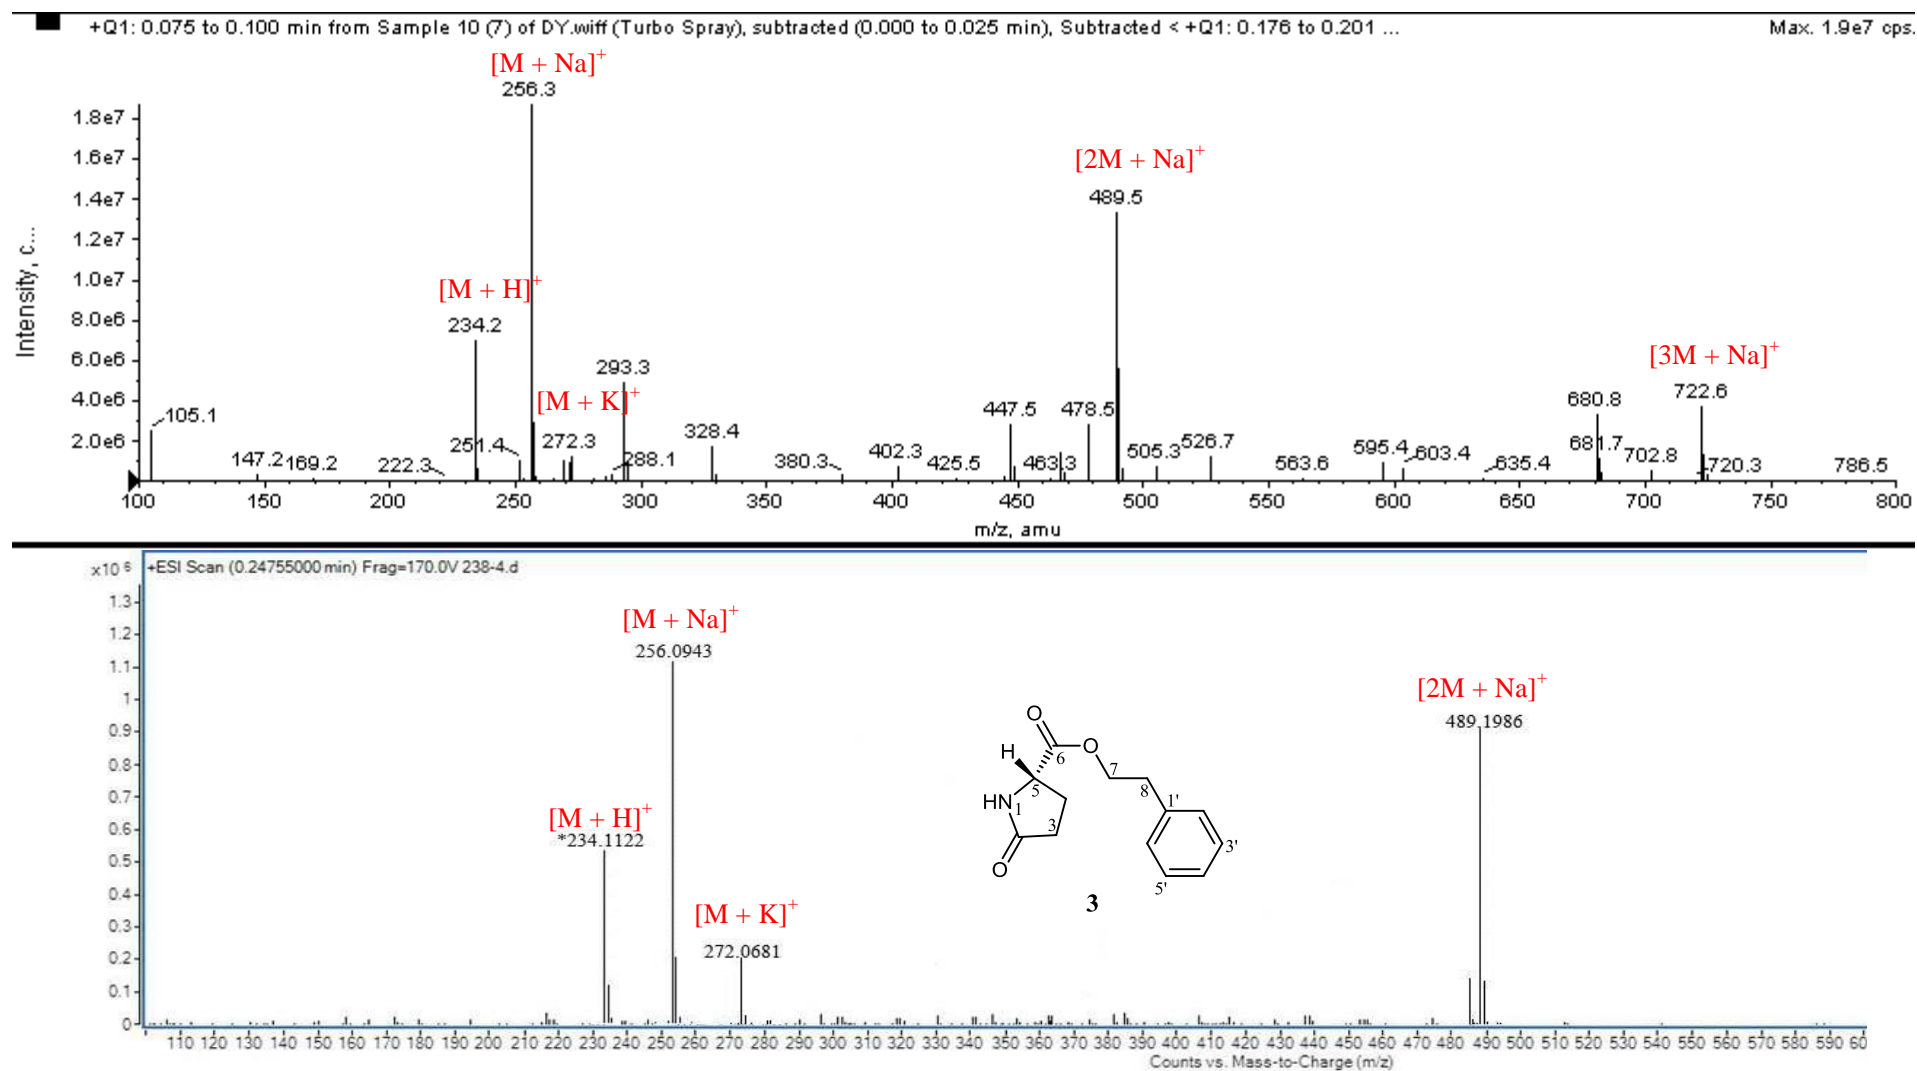



Figure S6. 400 MHz  $^1\text{H}$  NMR of **3** in  $\text{CD}_3\text{OD}$ .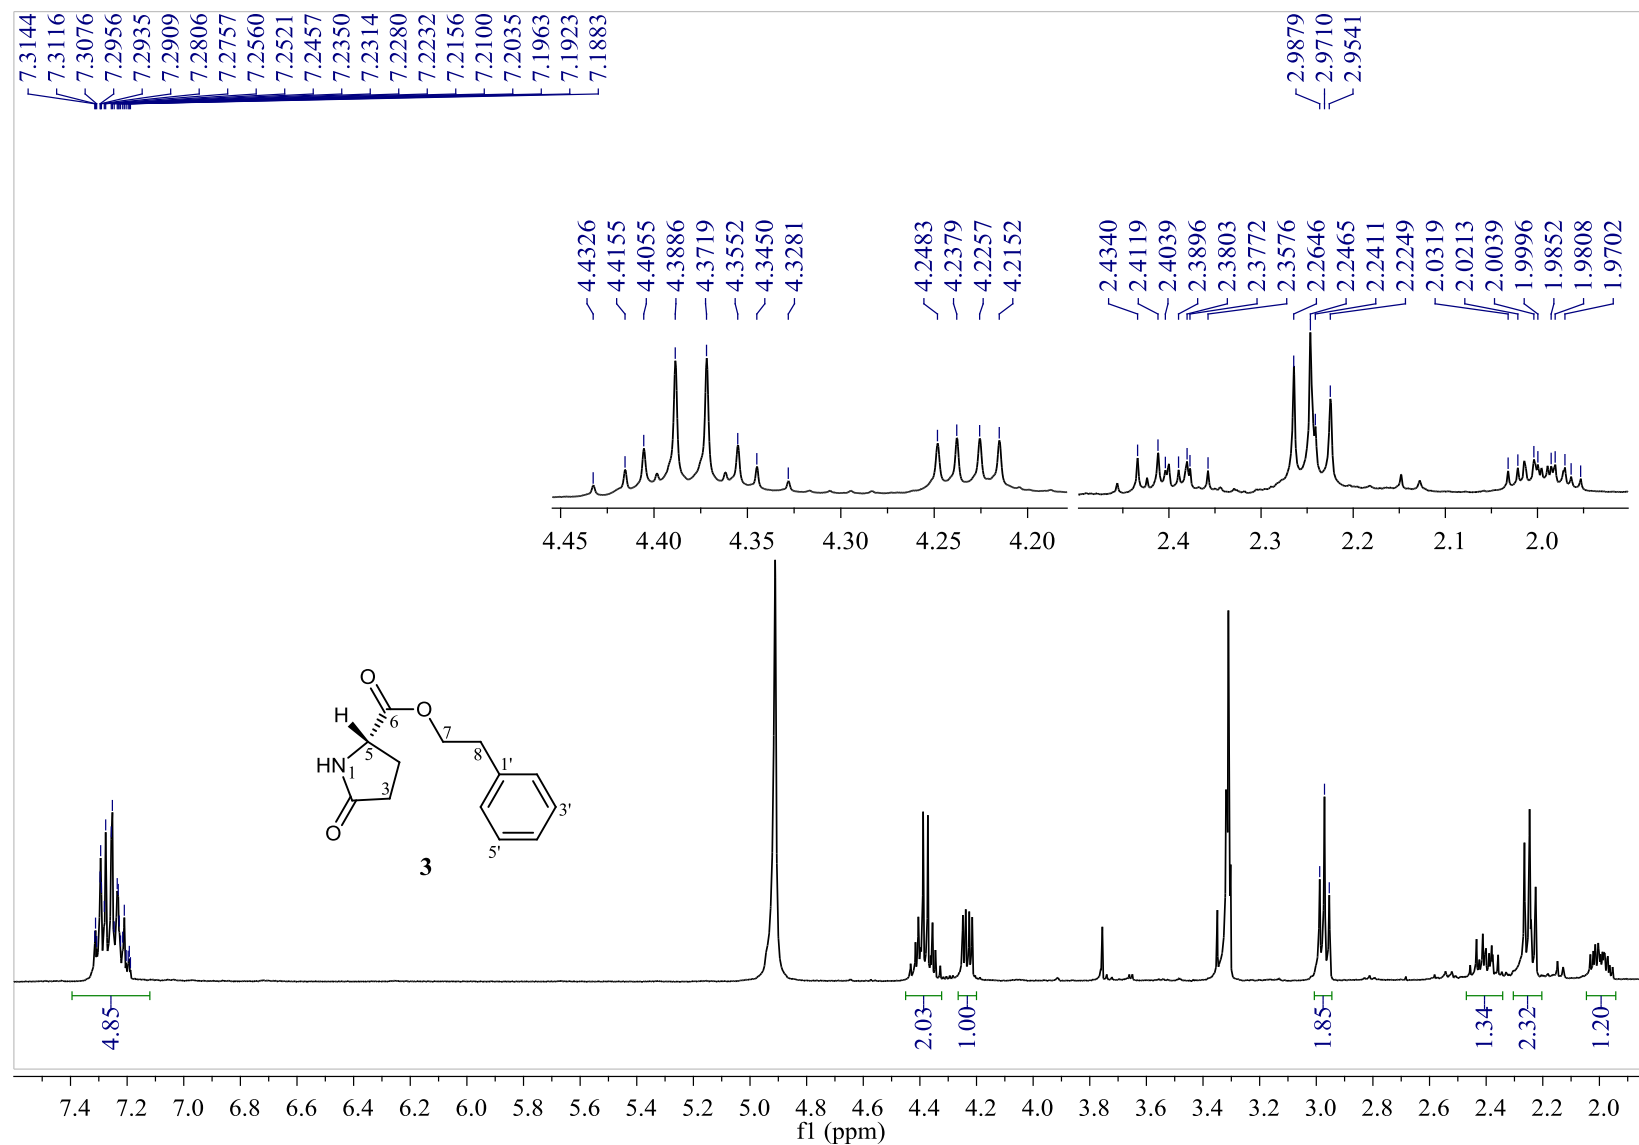

Figure S7. 100 MHz  $^{13}\text{C}$  NMR of **3** in  $\text{CD}_3\text{OD}$ .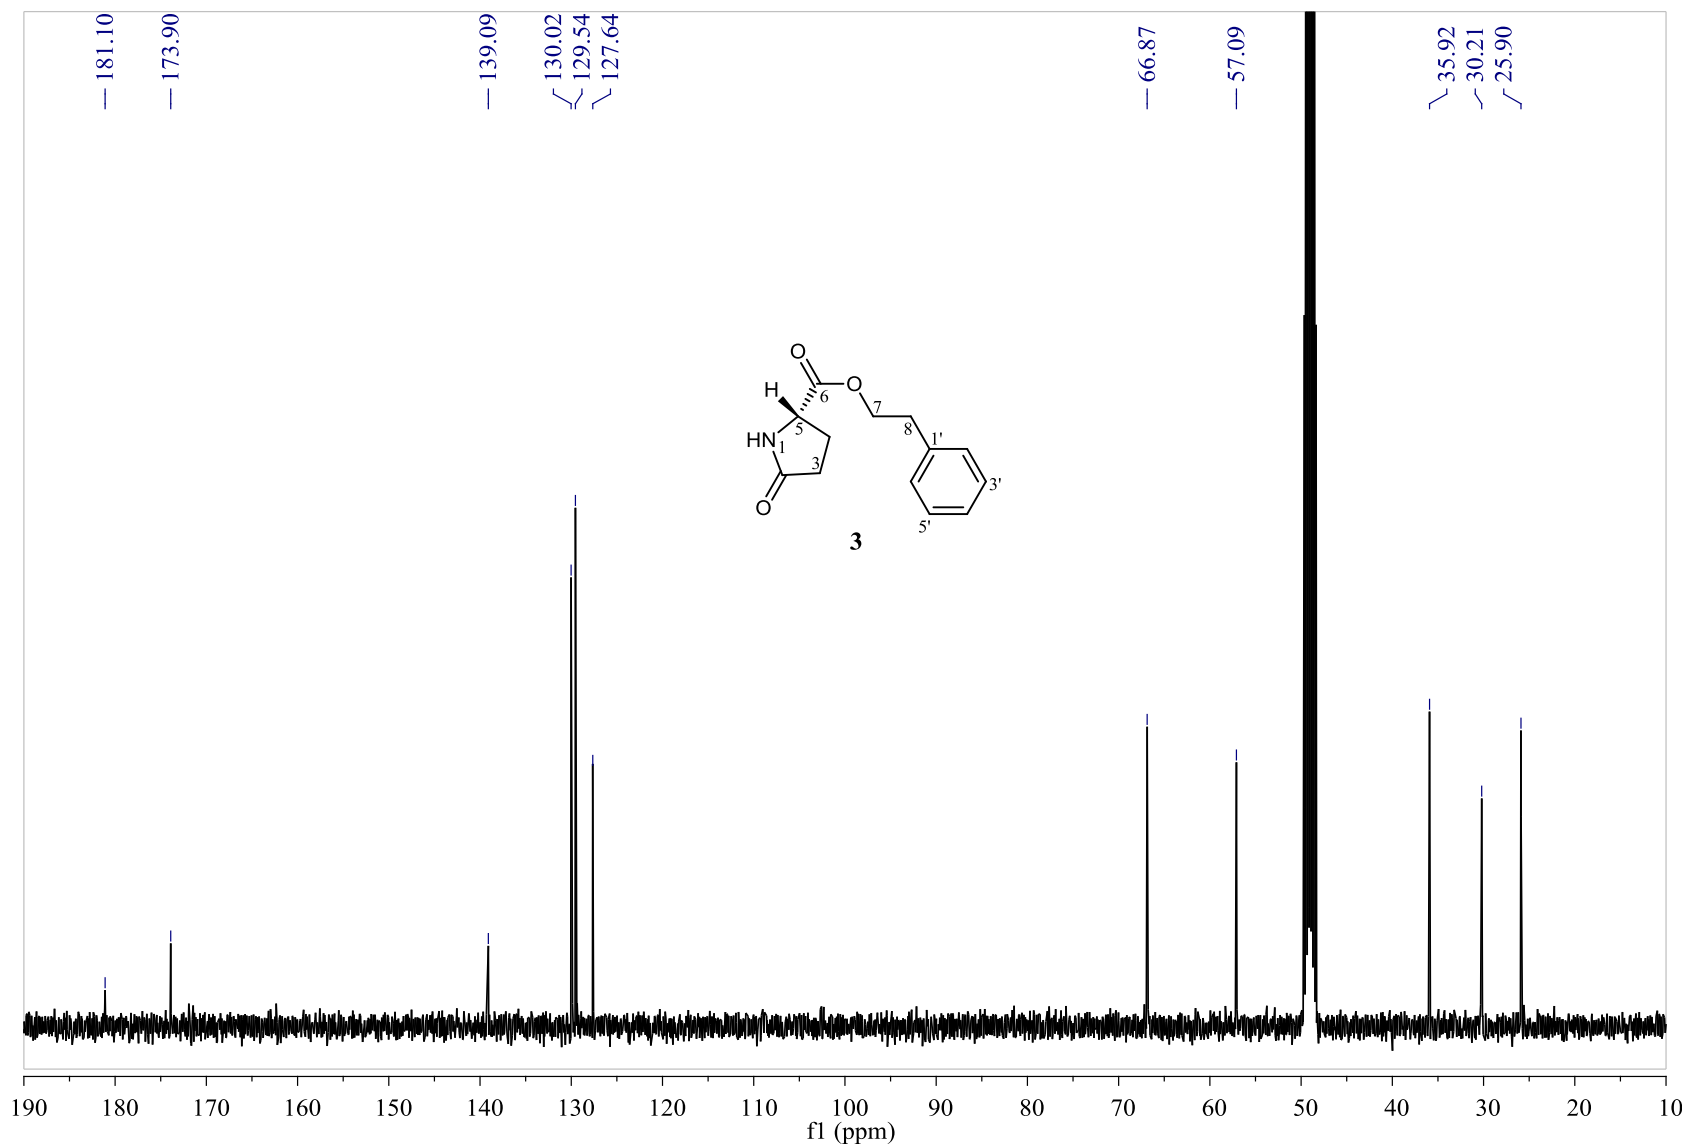

**Figure S8.**  $^1\text{H}$ - $^1\text{H}$  COSY spectrum of **3** in  $\text{CD}_3\text{OD}$ .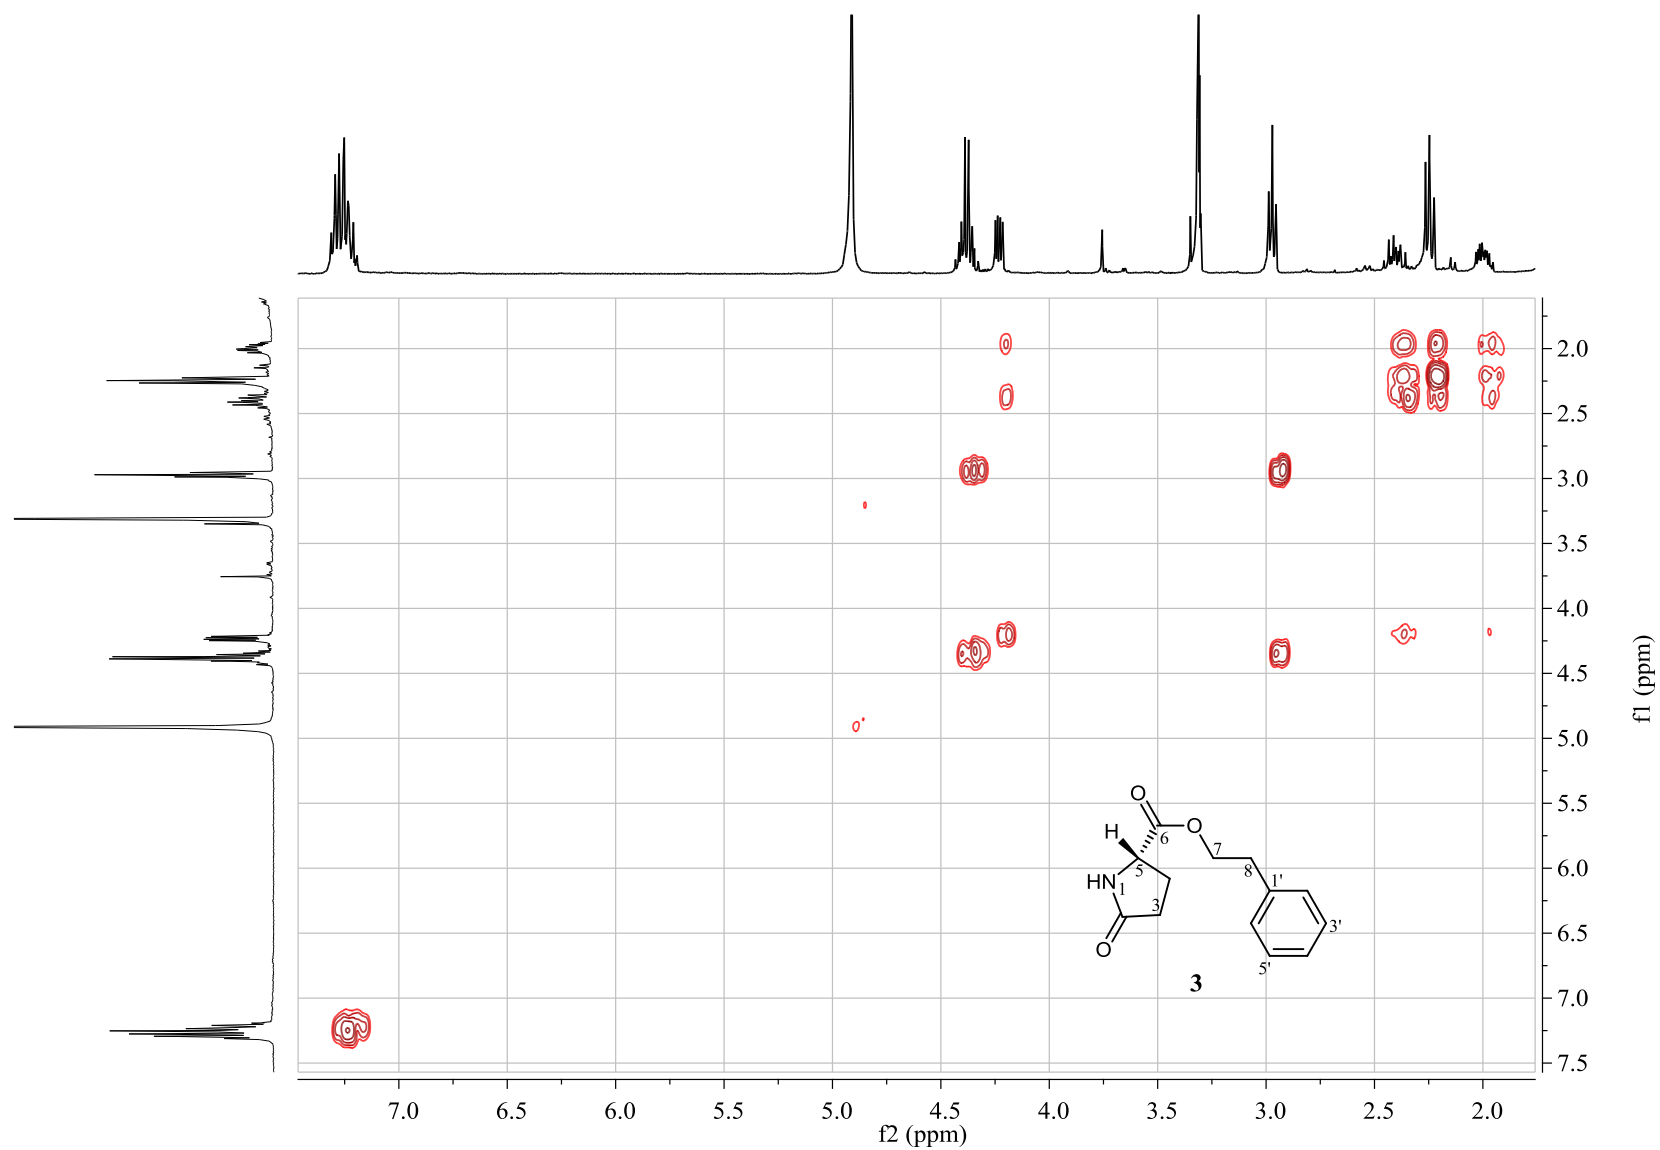

Figure S9. HMQC spectrum of **3** in CD<sub>3</sub>OD.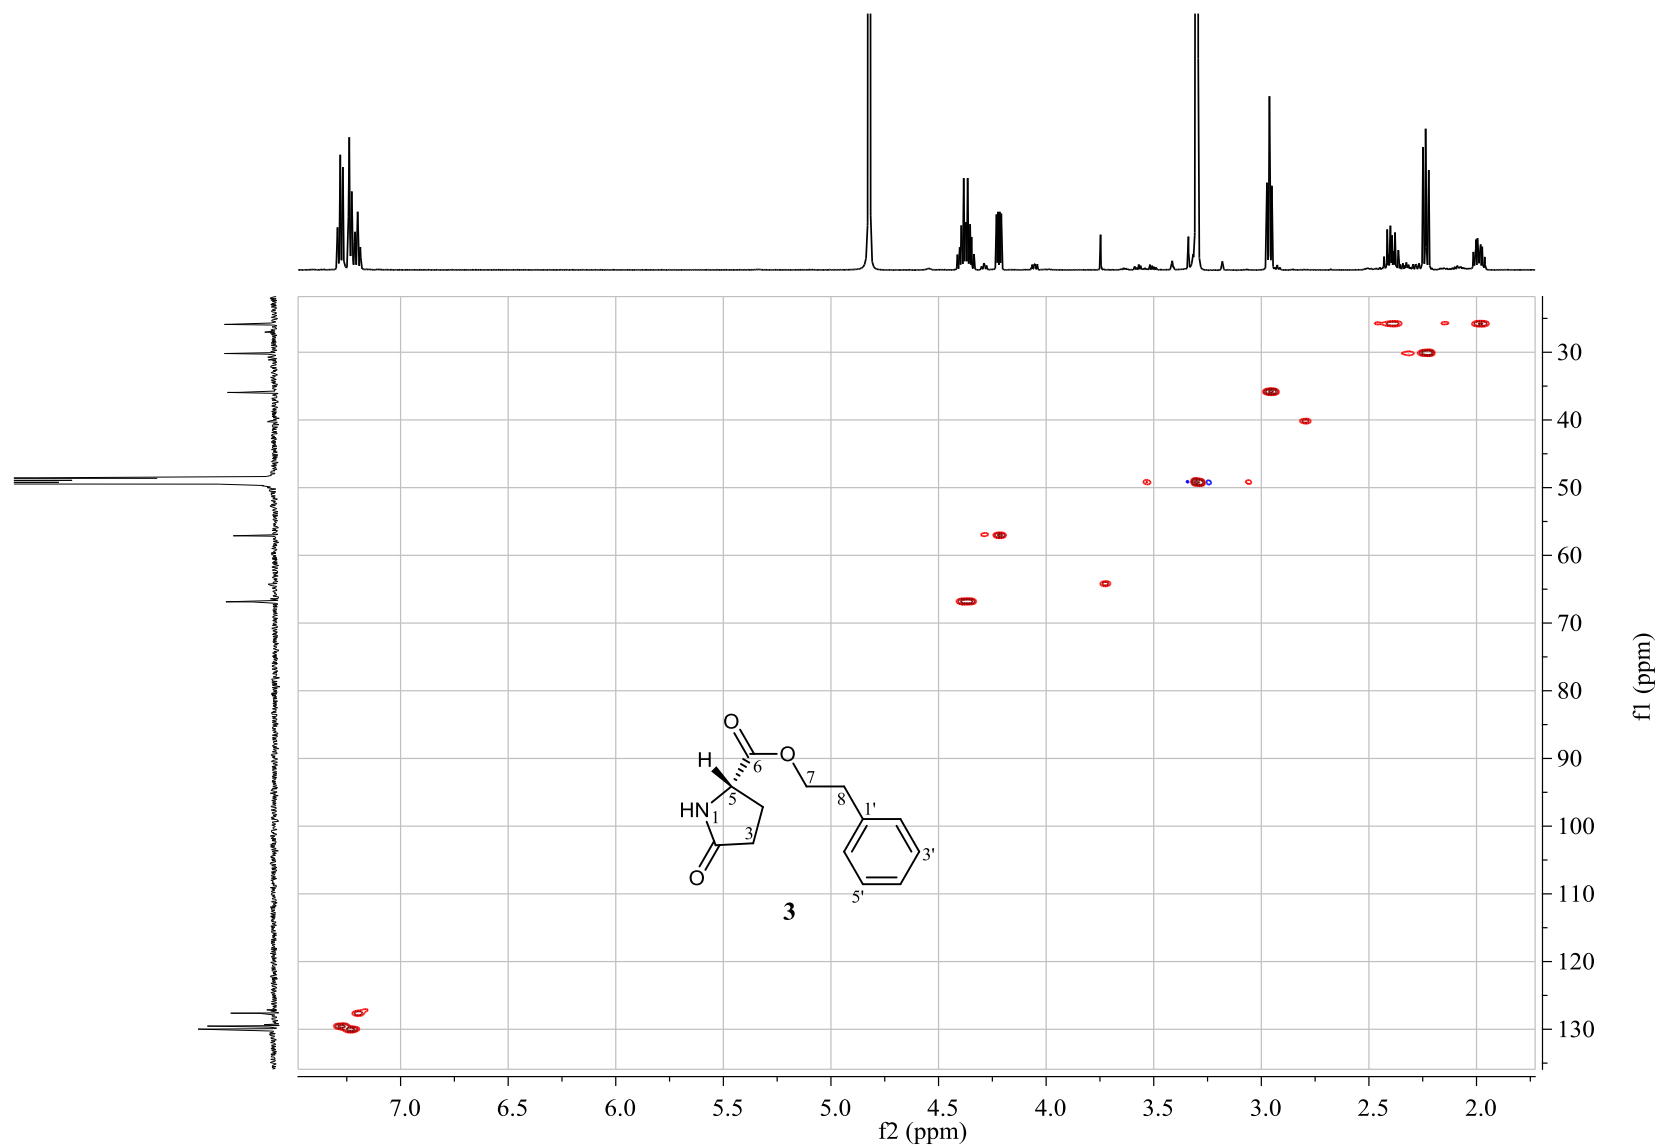

Figure S10. HMBC spectrum of **3** in CD<sub>3</sub>OD.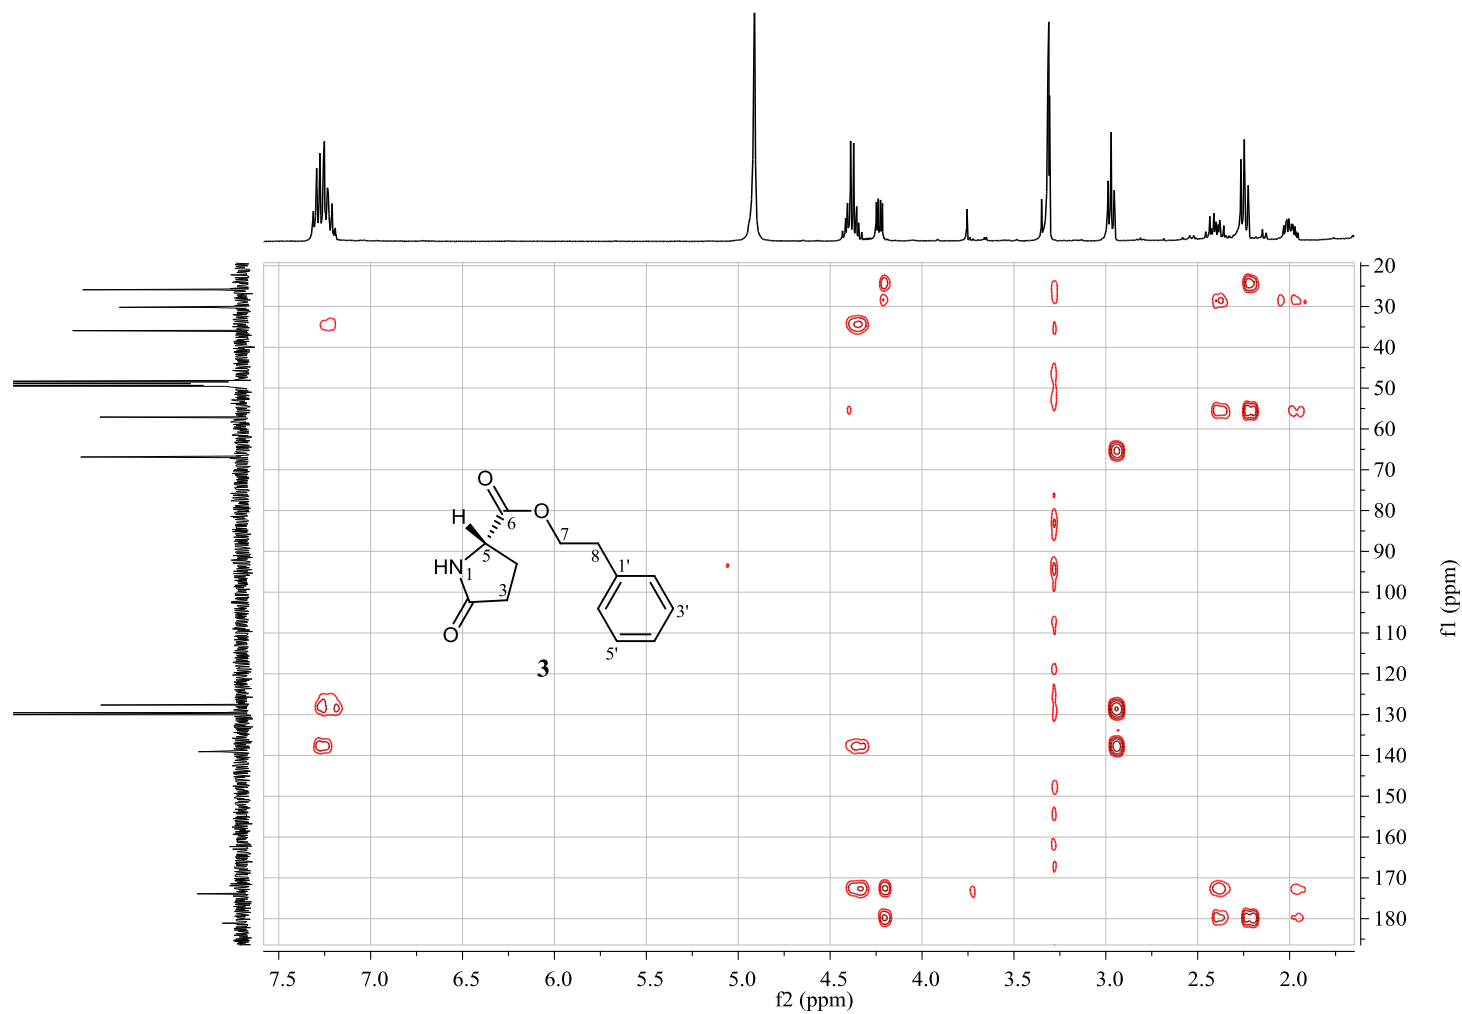

Supplement: marinedrugs-12-04326-s001.pdf [file marinedrugs-12-04326-s001.pdf]
